# Supplementary material for: Transition Metal-Free Synthesis of 3-Acylquinolines through Formal [4+2] Annulation of Anthranils and Enaminones
Source: MDPI journal article supplement (doi:10.3390/catal13040778), 2023-04-20

## ***Supporting Information***

### **Transition Metal-free Synthesis of 3-Substituted Quinolines through Formal [4+2] Annulation of Anthranils and Enaminones**

Kai-Ling Zhang <sup>1, #</sup>, Jia-Cheng Yang <sup>1, #</sup>, Qin Guo <sup>1</sup> and Liang-Hua Zou <sup>1, 2, \*</sup>

<sup>1</sup> Key Laboratory of Carbohydrate Chemistry and Biotechnology, Ministry of Education; School of Life Science and Health Engineering, Jiangnan University, Wuxi 214122, P.R. China

<sup>2</sup> School of Chemistry and Chemical Engineering, Henan Normal University, Xinxiang 453007, China

<sup>#</sup> KLZ and JCY contributed equally to this work.

<sup>\*</sup> Correspondence: zoulianghua@jiangnan.edu.cn

## **Contents**

|                                                |   |
|------------------------------------------------|---|
| <u>1. Table S1. Optimization studies</u> ..... | 2 |
| <u>2. Gram-scale Preparation of 3aa</u> .....  | 2 |
| <u>3. Competition Experiments</u> .....        | 2 |
| <u>4. NMR Spectra</u> .....                    | 4 |

## 1. Table S1. Optimization studies<sup>a</sup>

| Entry | Amount of<br><b>1a</b> (x mmol) | Amount of<br><b>2a</b> (y mmol) | Additive                                         | Solvent           | Temp.<br>(°C) | Yield <sup>b</sup> (%) |
|-------|---------------------------------|---------------------------------|--------------------------------------------------|-------------------|---------------|------------------------|
| 1     | 0.4                             | 0.2                             | TFA                                              | EtOH              | 110           | 27                     |
| 2     | 0.4                             | 0.2                             | MSA                                              | EtOH              | 110           | 31                     |
| 3     | 0.4                             | 0.2                             | Hexanoic acid                                    | EtOH              | 110           | 0                      |
| 4     | 0.4                             | 0.2                             | Acetic anhydride                                 | EtOH              | 110           | 0                      |
| 5     | 0.4                             | 0.2                             | HOAc                                             | EtOH              | 110           | 0                      |
| 6     | 0.4                             | 0.2                             | MSA                                              | HFIP              | 110           | 5                      |
| 7     | 0.4                             | 0.2                             | MSA                                              | DME               | 110           | 11                     |
| 8     | 0.4                             | 0.2                             | MSA                                              | <i>n</i> -Octanol | 110           | 0                      |
| 9     | 0.4                             | 0.2                             | MSA                                              | IPE               | 110           | 26                     |
| 10    | 0.4                             | 0.2                             | MSA                                              | <i>dioxane</i>    | 110           | 18                     |
| 11    | 0.4                             | 0.2                             | MSA                                              | THF               | 110           | 29                     |
| 12    | 0.4                             | 0.2                             | MSA                                              | MOE               | 110           | 2                      |
| 13    | 0.4                             | 0.2                             | MSA                                              | DMSO              | 110           | 0                      |
| 14    | 0.4                             | 0.2                             | /                                                | DMSO              | 110           | 0                      |
| 15    | 0.4                             | 0.2                             | MSA/KBr                                          | EtOH              | 110           | 58                     |
| 16    | 0.4                             | 0.2                             | MSA/KBr                                          | EtOH              | 110           | 37                     |
| 17    | 0.4                             | 0.2                             | MSA/KI                                           | EtOH              | 110           | 89                     |
| 18    | 0.4                             | 0.2                             | MSA/NaI                                          | EtOH              | 110           | 90                     |
| 19    | 0.4                             | 0.2                             | MSA/K <sub>2</sub> S <sub>2</sub> O <sub>8</sub> | EtOH              | 110           | 16                     |
| 20    | 0.4                             | 0.2                             | MSA/NaI                                          | EtOH              | 70            | 43                     |
| 21    | 0.4                             | 0.2                             | MSA/NaI                                          | EtOH              | 80            | 65                     |
| 22    | 0.4                             | 0.2                             | MSA/NaI                                          | EtOH              | 90            | 84                     |
| 23    | 0.4                             | 0.2                             | MSA/NaI                                          | EtOH              | 120           | 90                     |

<sup>a</sup> Reaction conditions: **1a** (x mmol), **2a** (y mmol), additive (1.5 equiv), solvent (2 mL), 110 °C, under air 12 h. <sup>b</sup> Isolated yield.

## 2. Gram-scale Preparation of **3aa**

A mixture of benzo[c]isoxazole (**1a**) (12 mmol, 2.0 equiv), (*E*)-3-(dimethylamino)-1-phenylprop-2-en-1-one (**2a**) (1050.6 mg, 6.0 mmol, 1.0 equiv) and NaI (1350 mg, 1.5 equiv) were added in a 100 mL round bottom flask equipped with a stirring bar. Dry EtOH (20 mL) and methanesulfonic acid (MSA) (9 mmol, 1.5 equiv) were added and the mixture was stirred at 110 °C in a preheated oil bath for 12 h under air atmosphere. Then the mixture was cooled to room temperature and concentrated in vacuo and the resulting residue was purified by flash column chromatography on silica gel with EtOAc/petroleum ether, affording product **3aa** as a yellow solid in 85% yield (1.192 g, 5.1 mmol).

## 3. Competition Experiments

A mixture of (*E*)-3-(dimethylamino)-1-(*p*-tolyl)prop-2-en-1-one (**2b**) (37.8 mg, 0.2 mmol, 1.0 equiv), (*E*)-3-(dimethylamino)-1-(4-fluorophenyl)prop-2-en-1-one (**2g**) (38.6 mg, 0.2 mmol, 1.0 equiv), benzo[c]isoxazole (**1a**) (23.8 mg, 0.2 mmol, 1.0 equiv) and NaI (45 mg, 0.3 mmol, 1.5 equiv) were added in a Schlenk sealed tube equipped with a stirring bar. Dry EtOH (2.0 mL) and MSA (0.3 mmol, 1.5 equiv) were added and the mixture was stirred at 110 °C in a pre-heated oil bath for 12 h under air atmosphere. Then, the mixture was cooled to room temperature and concentrated in vacuo and the resulting residue was purified by flash column chromatography on

silica gel with EtOAc/petroleum ether to give a mixture of products **3ab** and **3ag** at a ratio of 1:0.64.

A mixture of (*E*)-3-(dimethylamino)-1-(p-tolyl)prop-2-en-1-one (**2b**) (37.8 mg, 0.2 mmol, 1.0 equiv), (*E*)-3-(dimethylamino)-1-(4-(trifluoromethyl)phenyl)prop-2-en-1-one (**2m**) (48.6 mg, 0.2 mmol, 1.0 equiv), benzo[*c*]isoxazole (**1a**) (23.8 mg, 0.2 mmol, 1.0 equiv) and NaI (45 mg, 0.3 mmol, 1.5 equiv) were added in a Schlenk sealed tube equipped with a stirring bar. Dry EtOH (2.0 mL) and MSA (0.3 mmol, 1.5 equiv) were added and the mixture was stirred at 110 °C in a pre-heated oil bath for 12 h under air atmosphere. Then the mixture was cooled to room temperature and concentrated in vacuo and the resulting residue was purified by flash column chromatography on silica gel with EtOAc/petroleum ether to give a mixture of products **3ab** and **3am** at a ratio of 1:0.62.

## 4.NMR Spectra

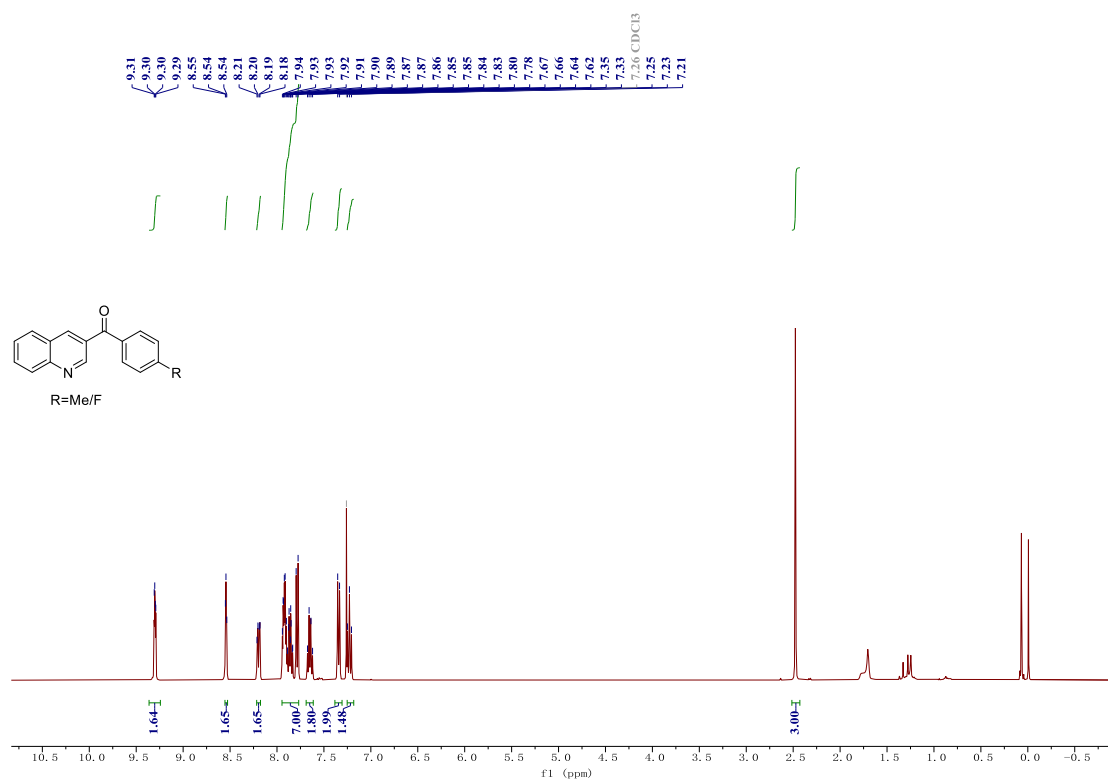

<sup>1</sup>H NMR of the mixture of **3ab** and **3ag** for the competition experiment

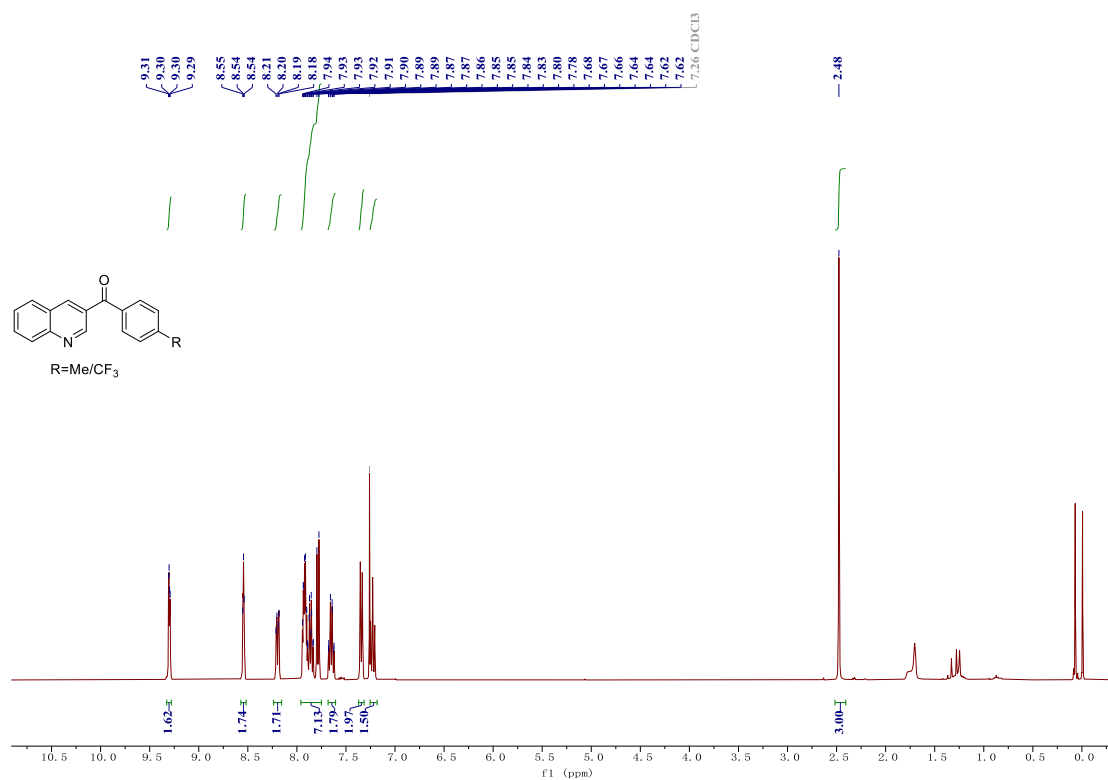

<sup>1</sup>H NMR of the mixture of **3ab** and **3am** for the competition experiment

# <sup>1</sup>H NMR and <sup>13</sup>C NMR for **3aa**

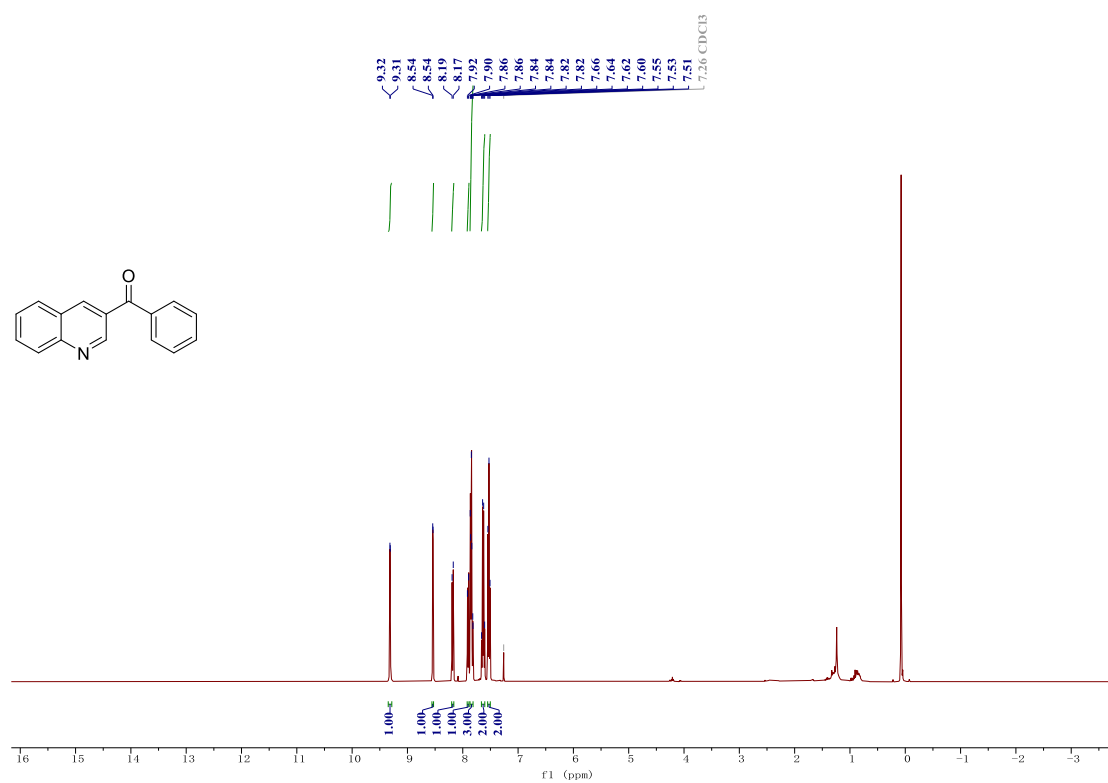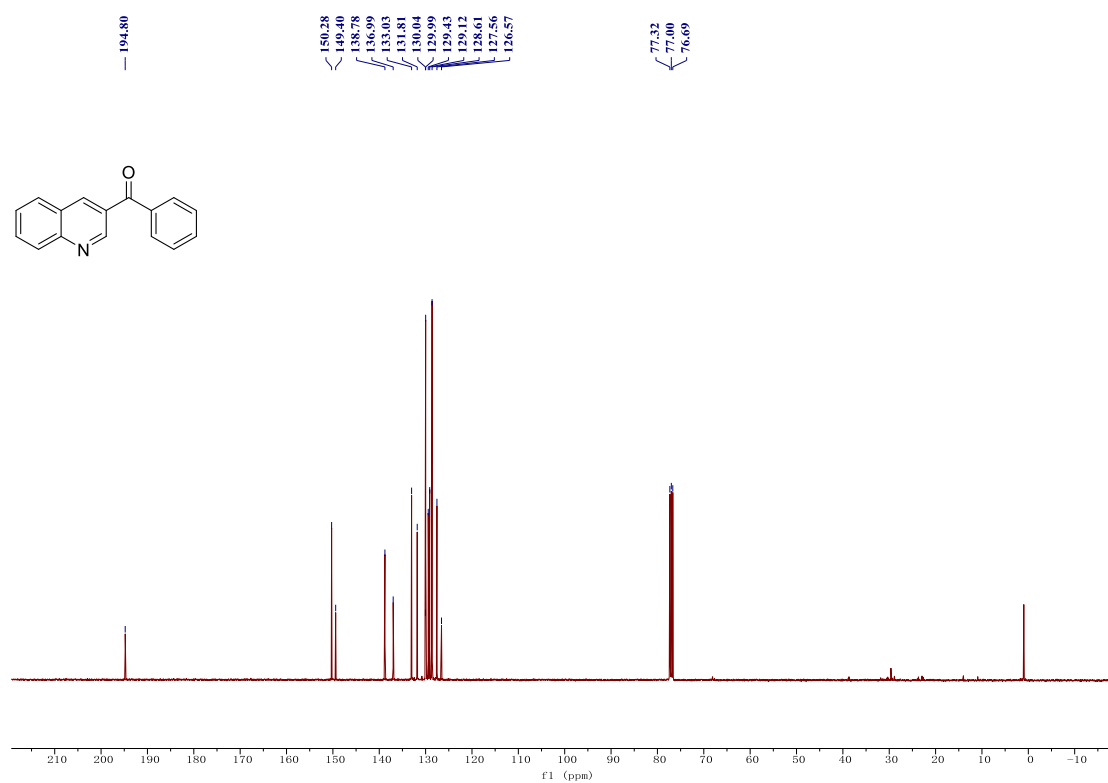

# <sup>1</sup>H NMR and <sup>13</sup>C NMR for **3ab**

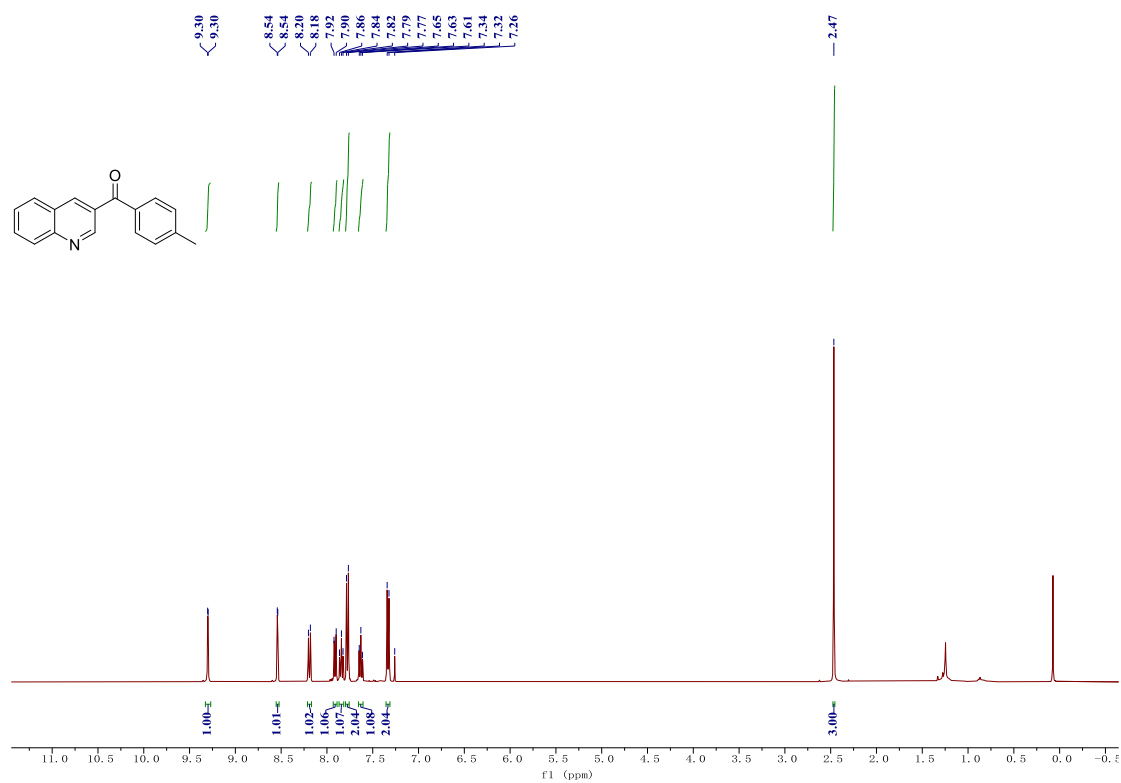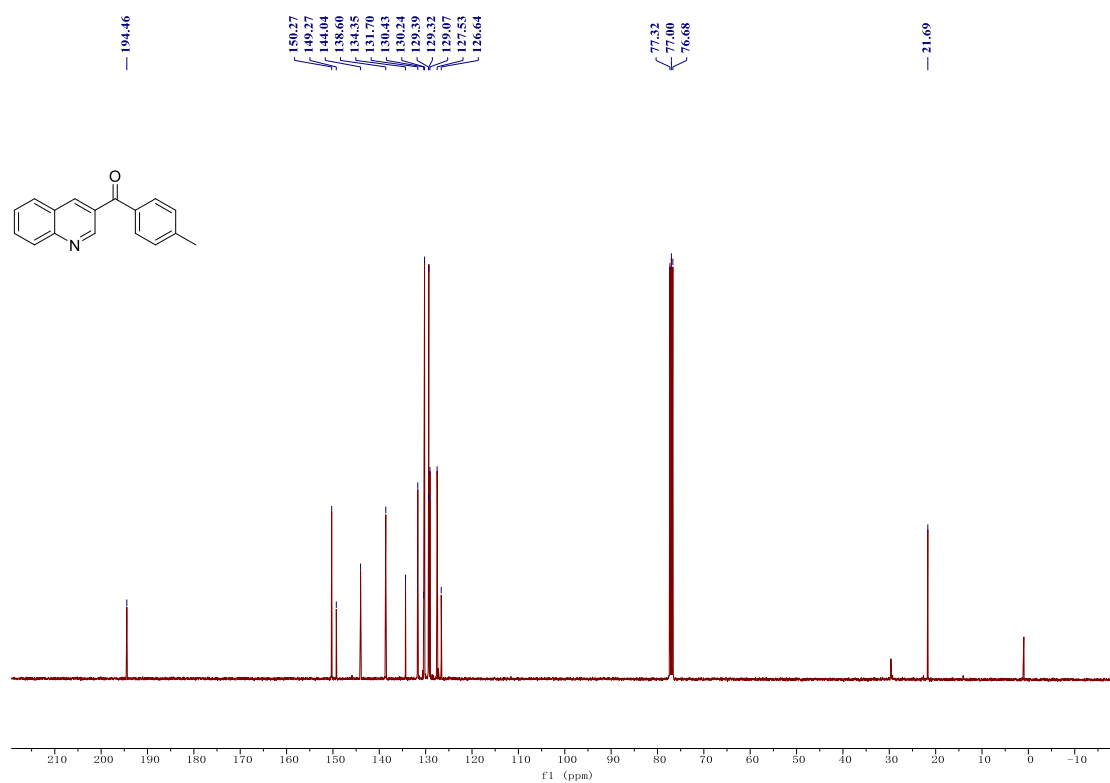

<sup>1</sup>H NMR and <sup>13</sup>C NMR for **3ac**

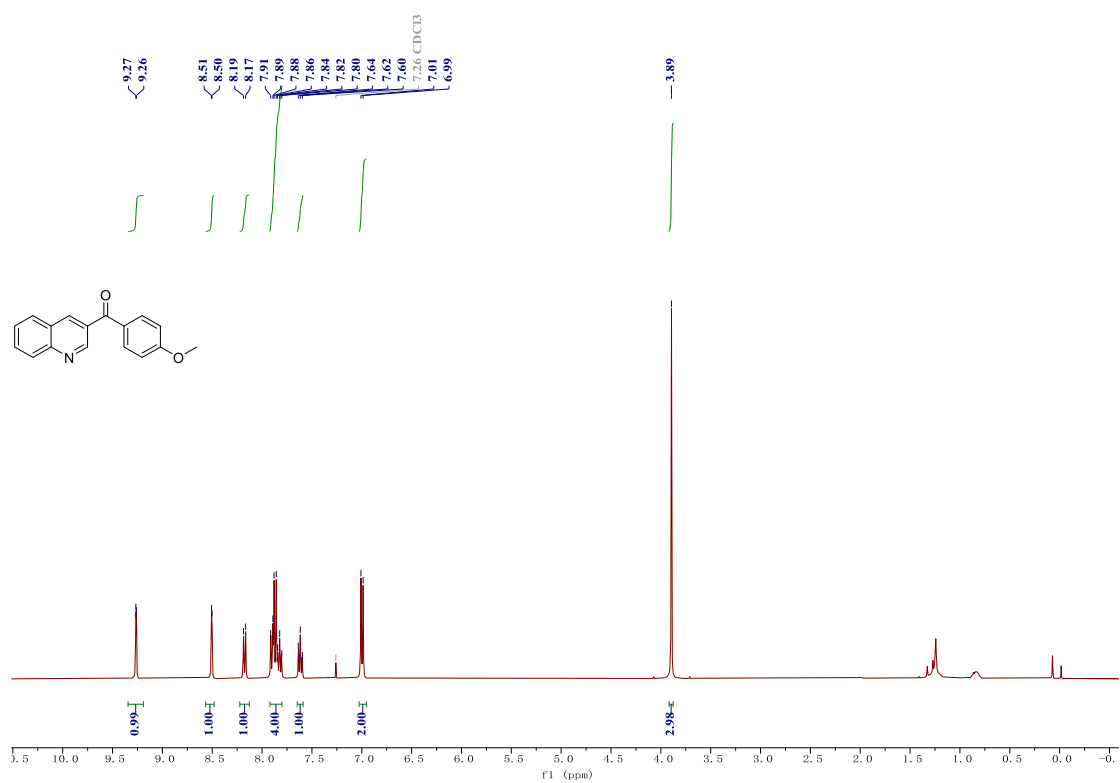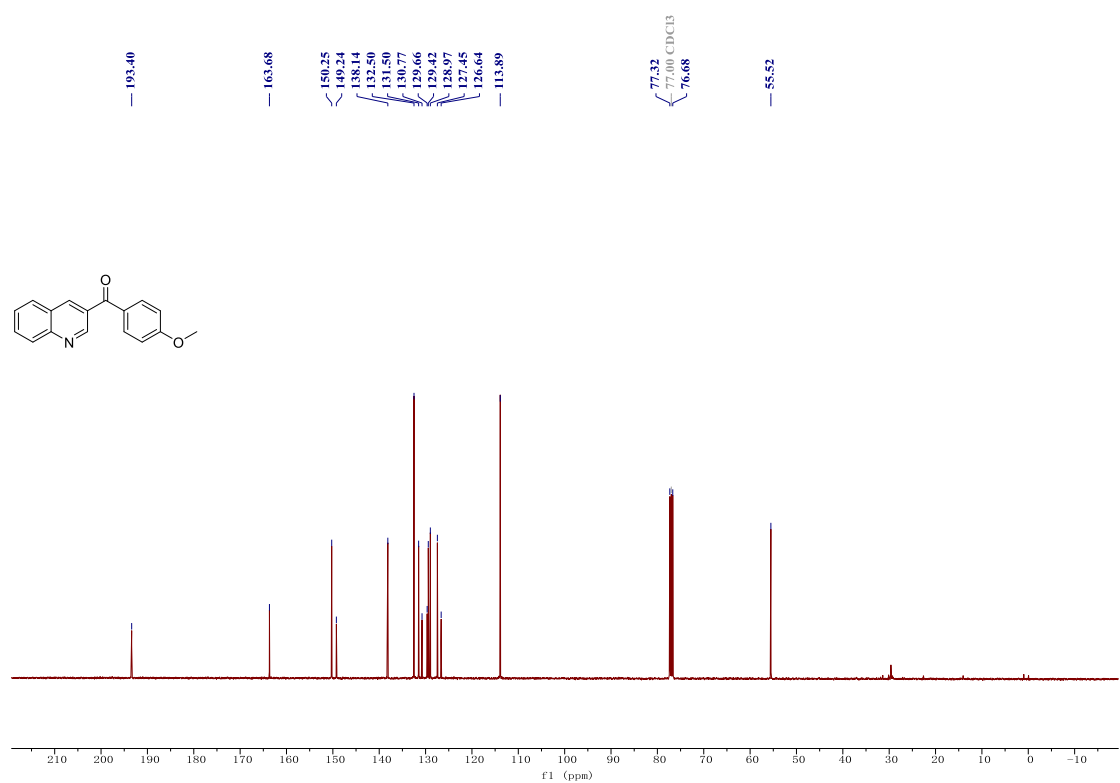

# <sup>1</sup>H NMR and <sup>13</sup>C NMR for **3ad**

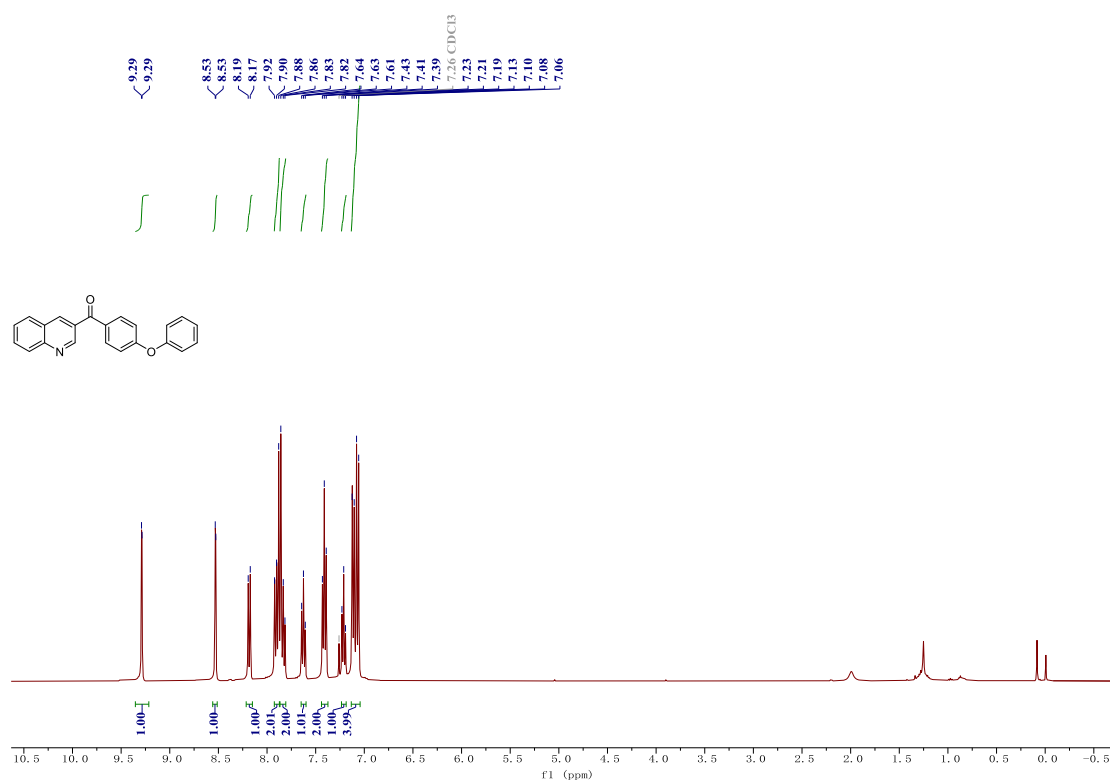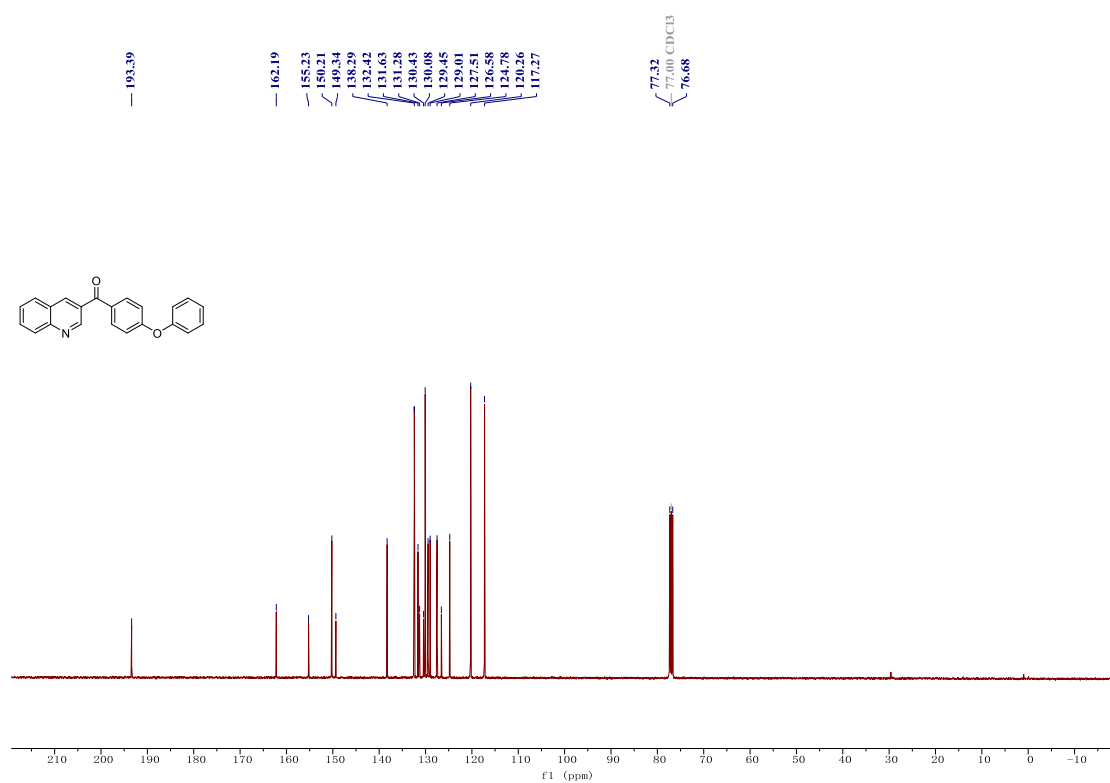

# <sup>1</sup>H NMR and <sup>13</sup>C NMR for **3ae**

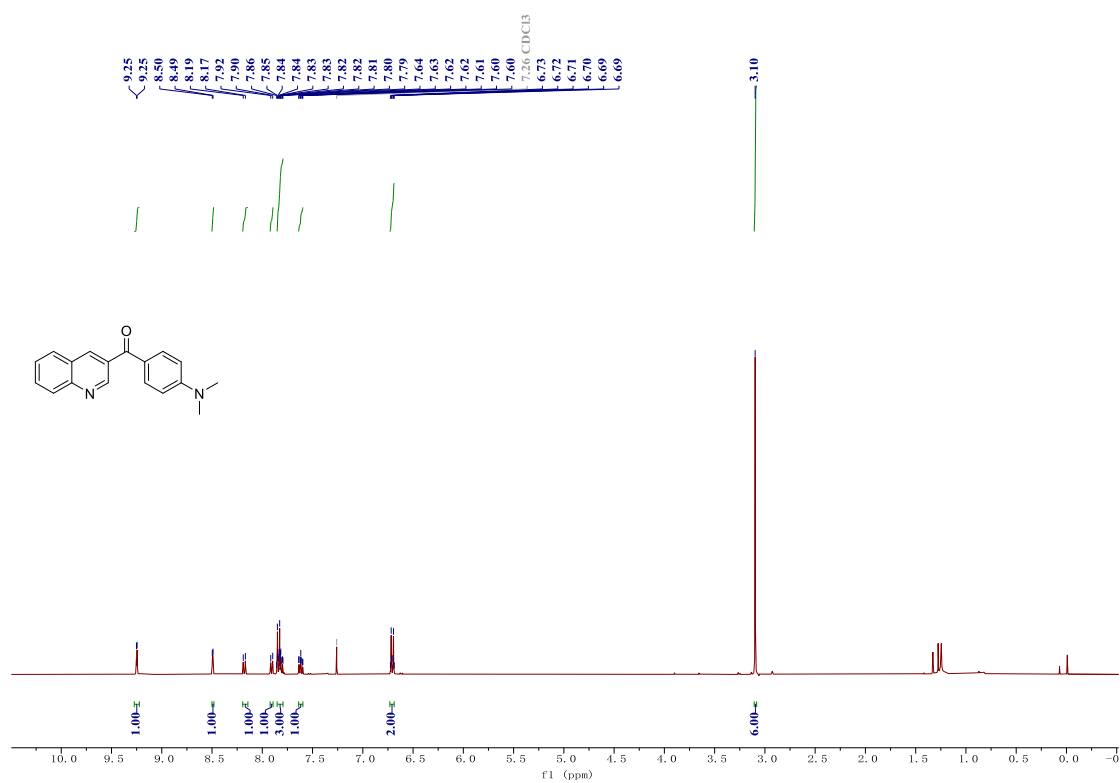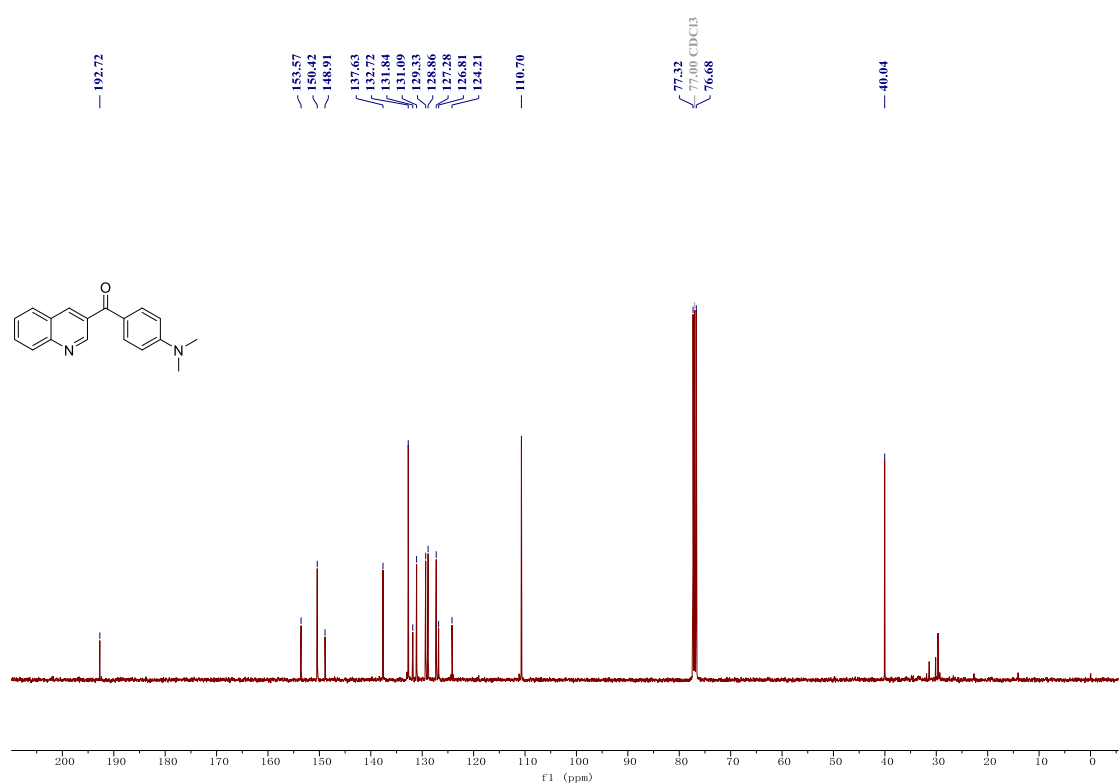

<sup>1</sup>H NMR and <sup>13</sup>C NMR for **3af**

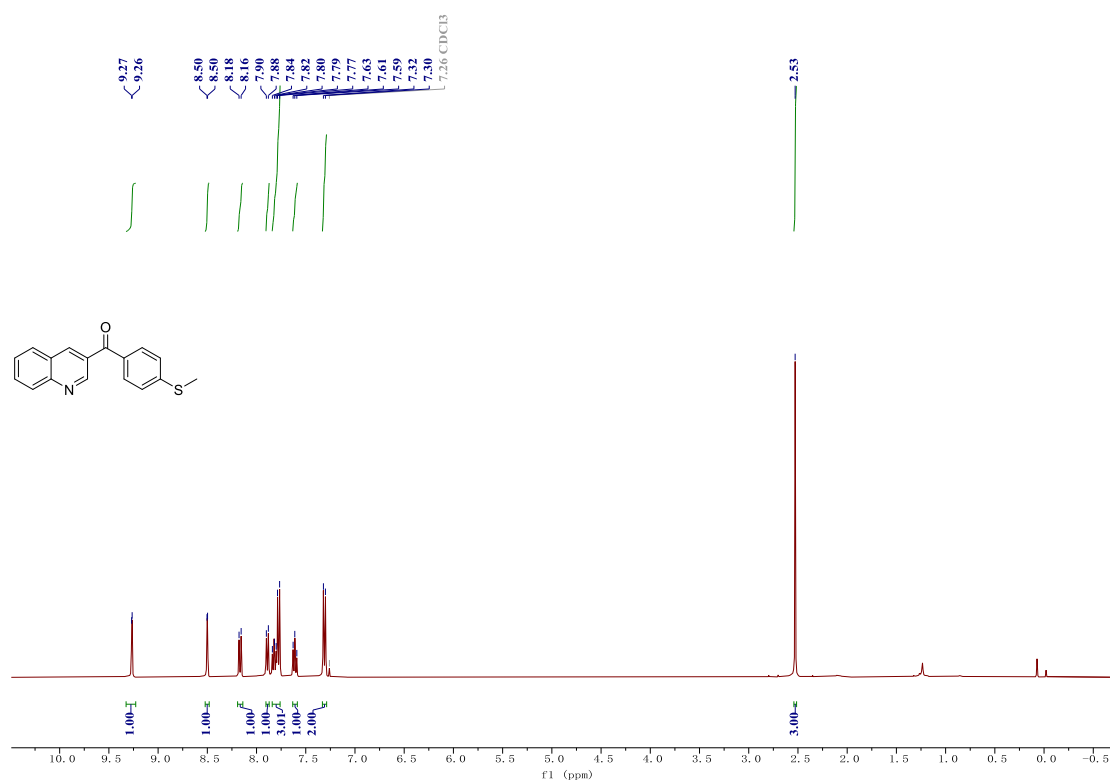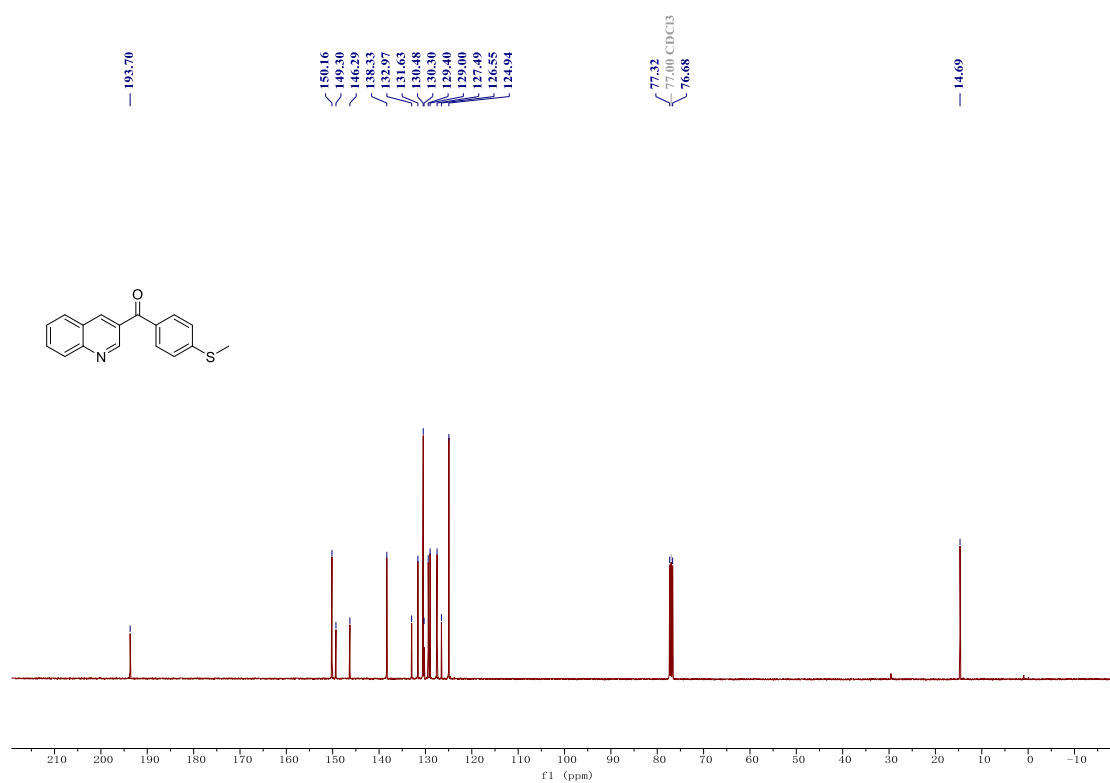

<sup>1</sup>H NMR, <sup>13</sup>C NMR and <sup>19</sup>F NMR for **3ag**

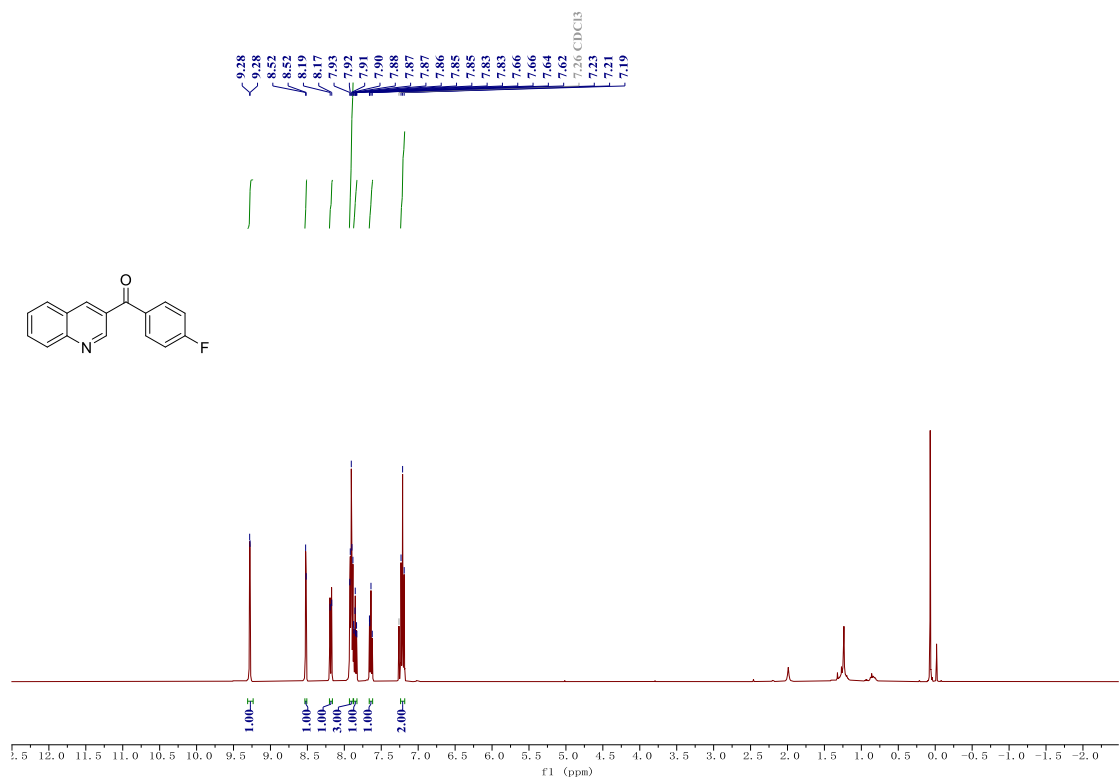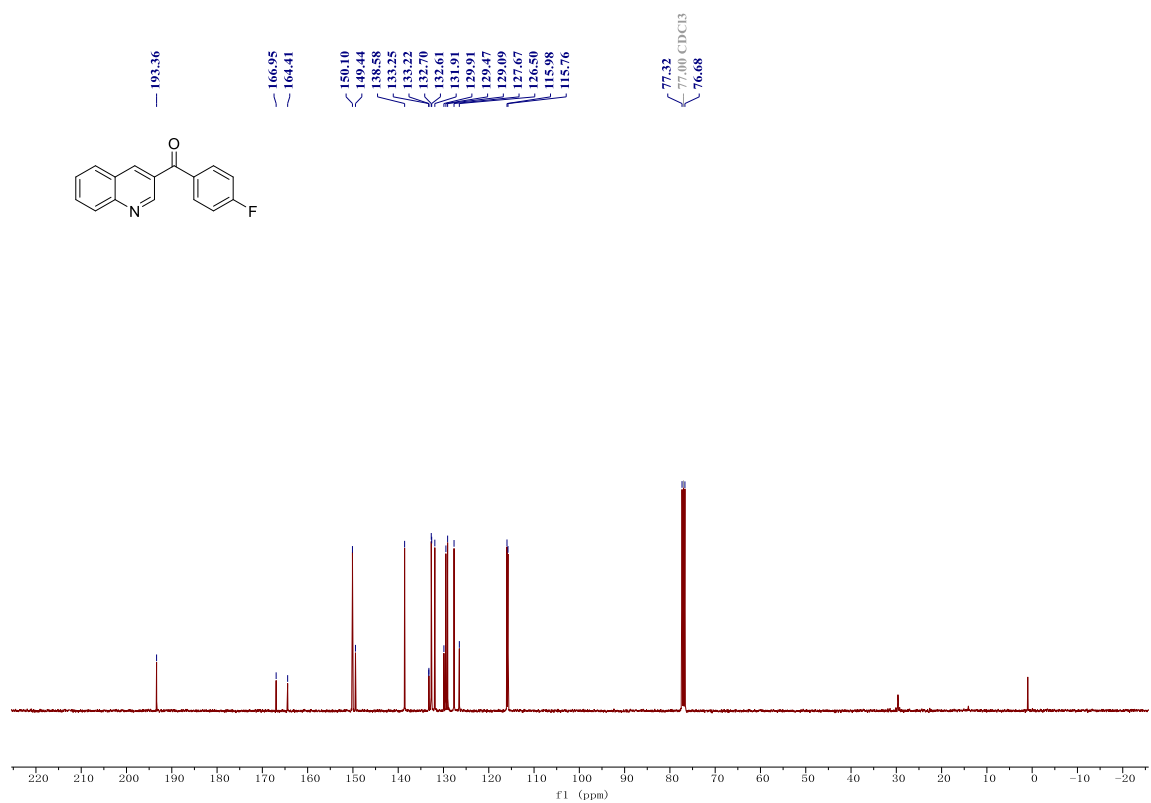

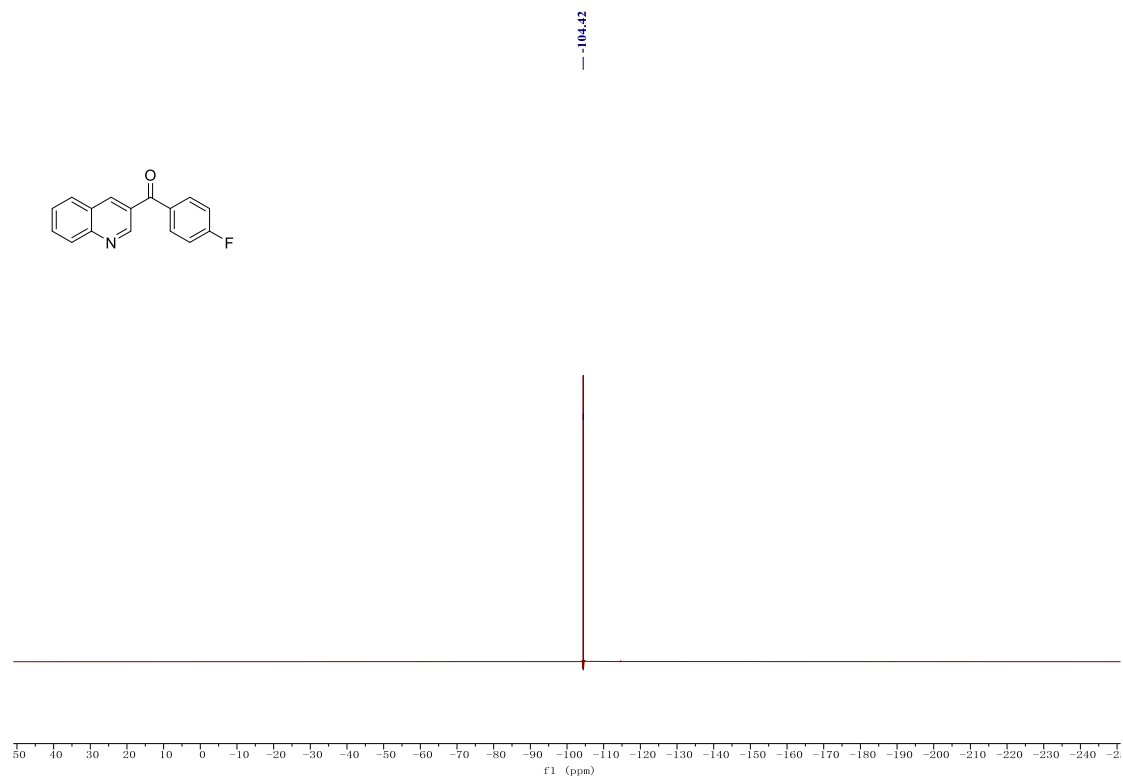

# <sup>1</sup>H NMR and <sup>13</sup>C NMR for **3ah**

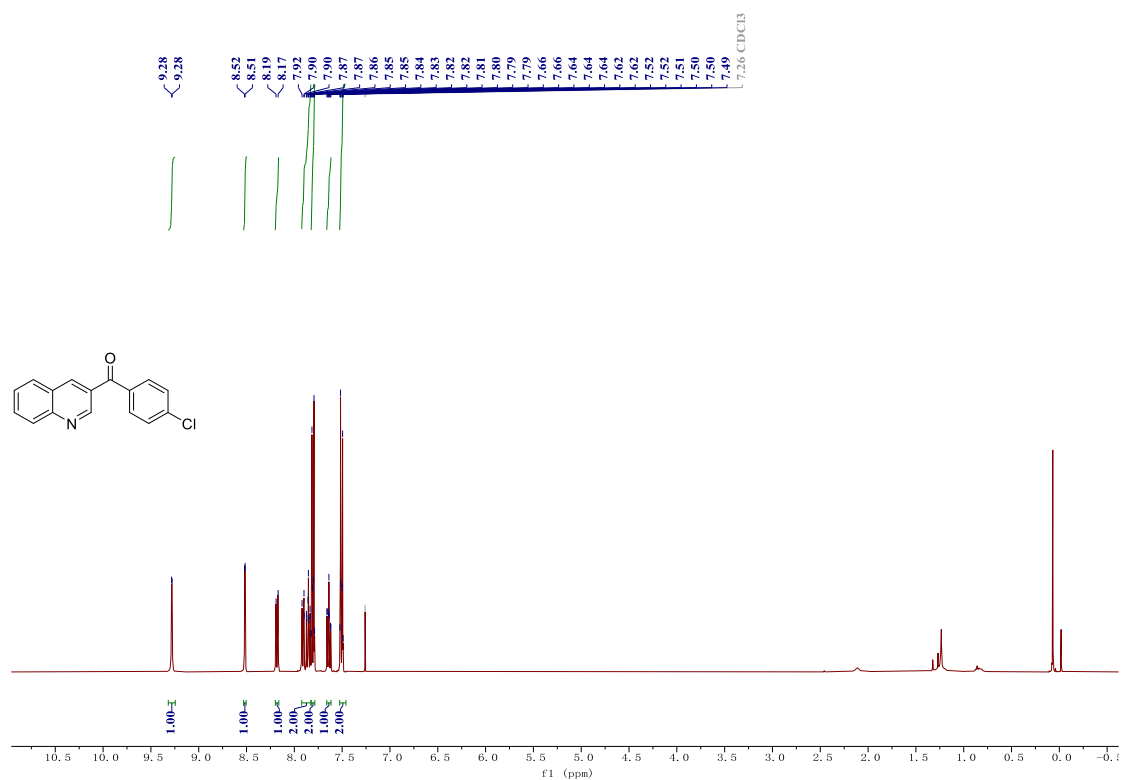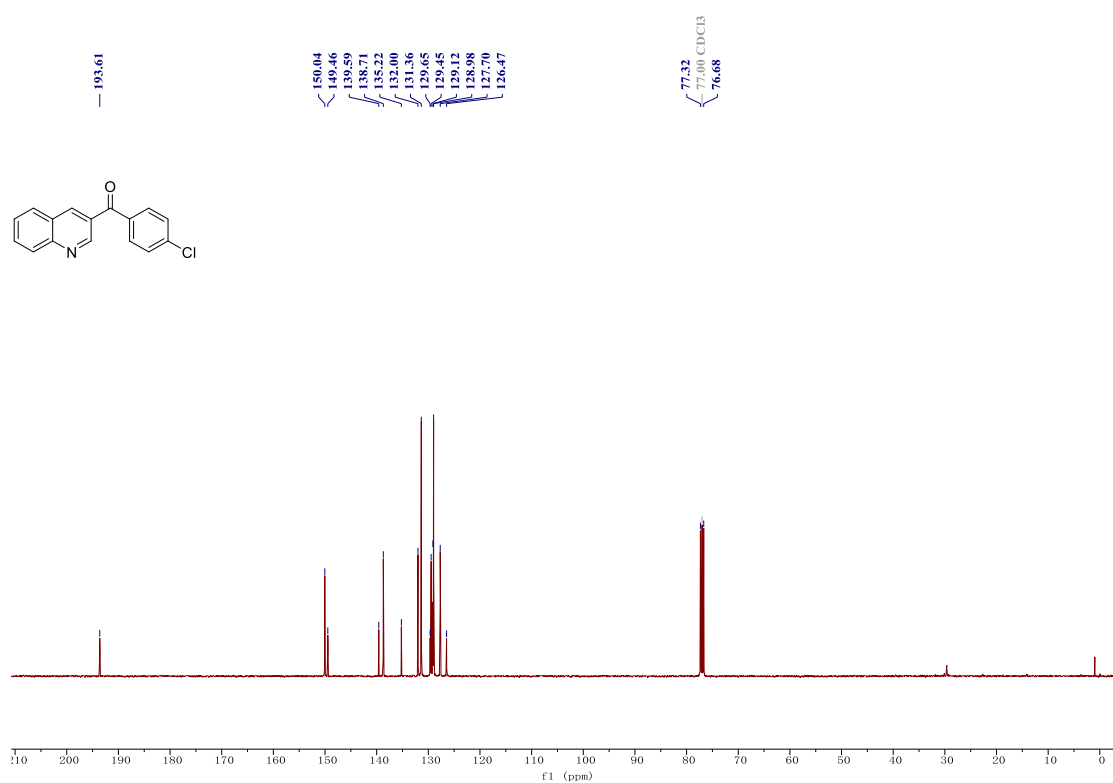

# <sup>1</sup>H NMR and <sup>13</sup>C NMR for **3ai**

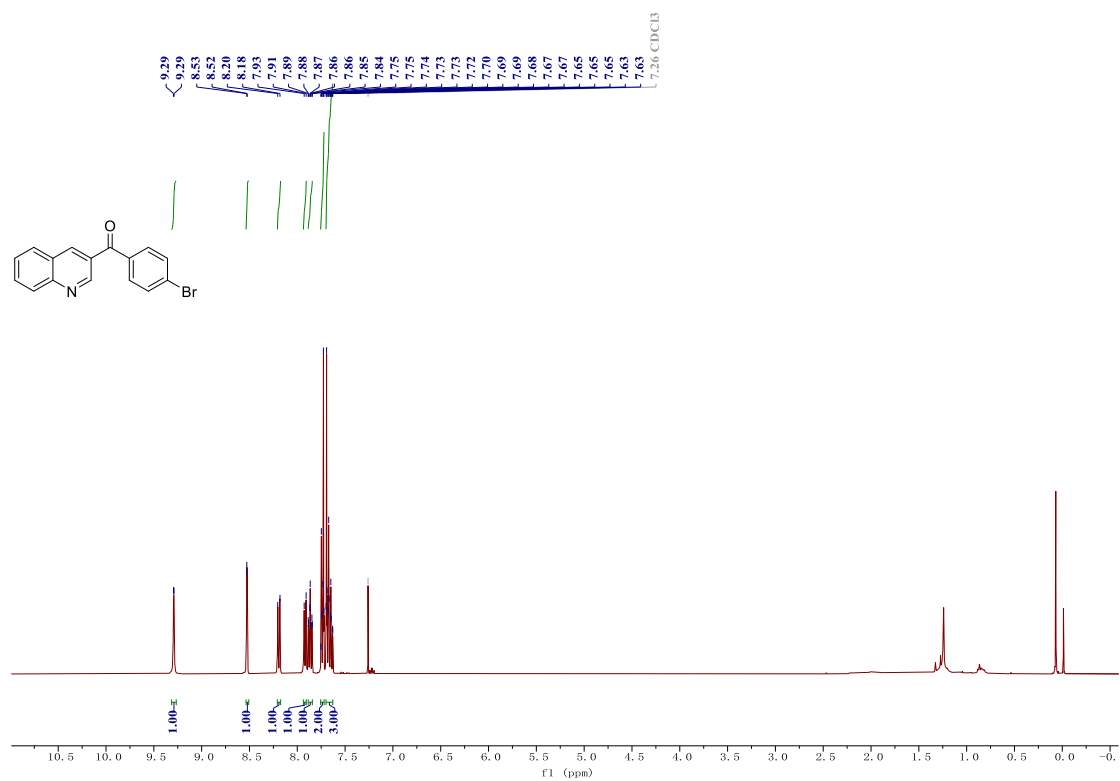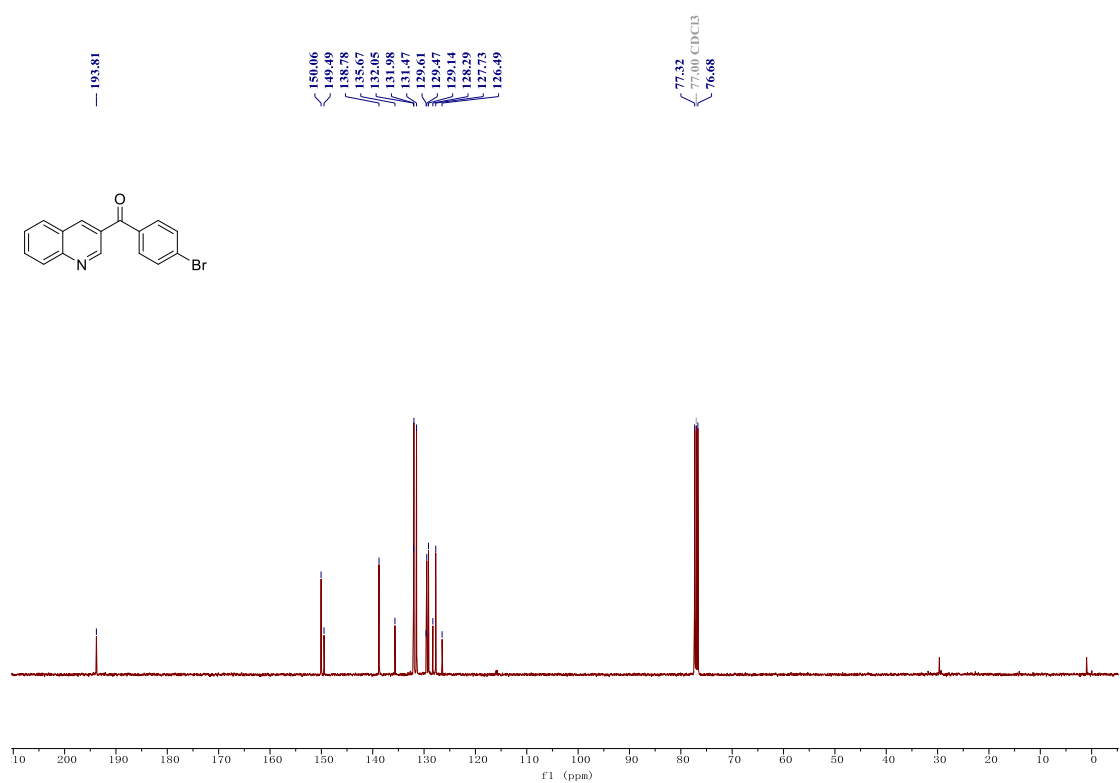

# <sup>1</sup>H NMR and <sup>13</sup>C NMR for **3aj**

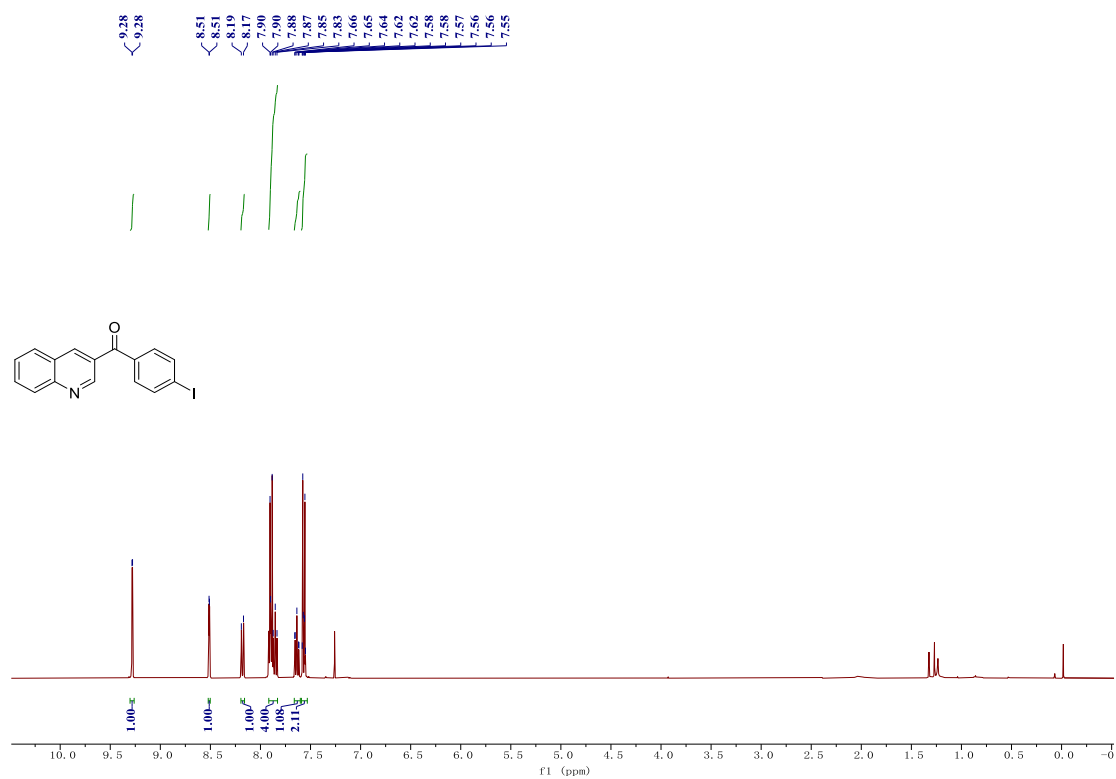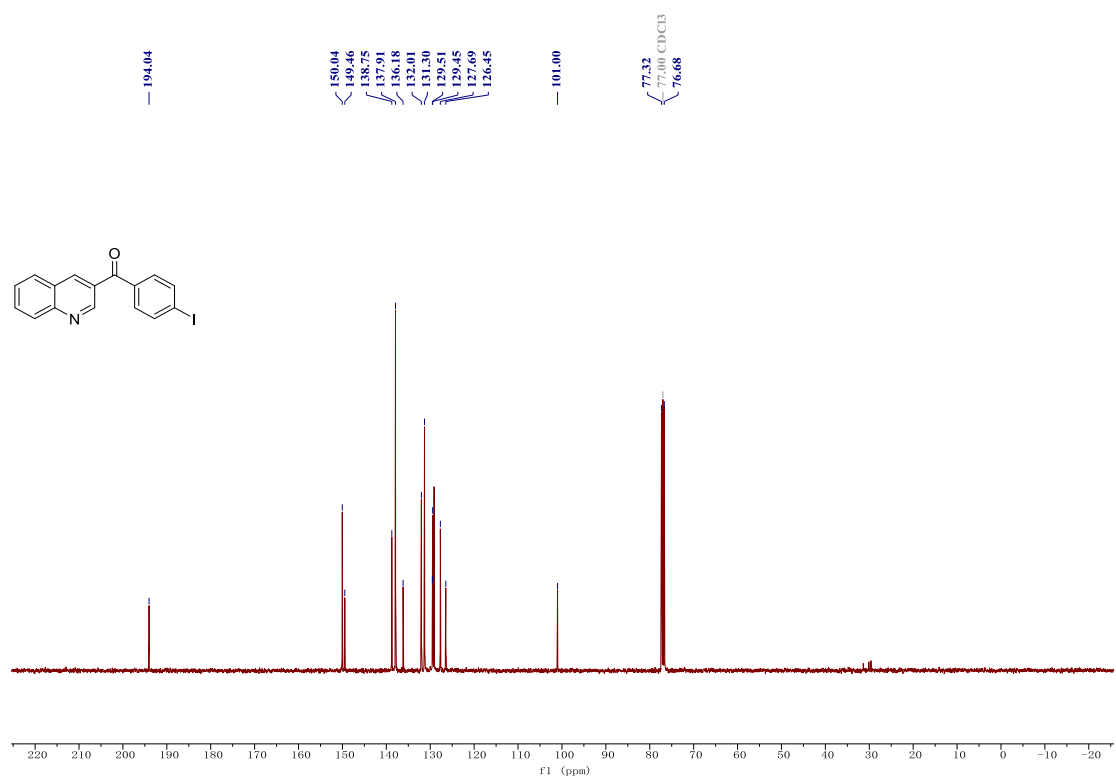

<sup>1</sup>H NMR and <sup>13</sup>C NMR for **3ak**

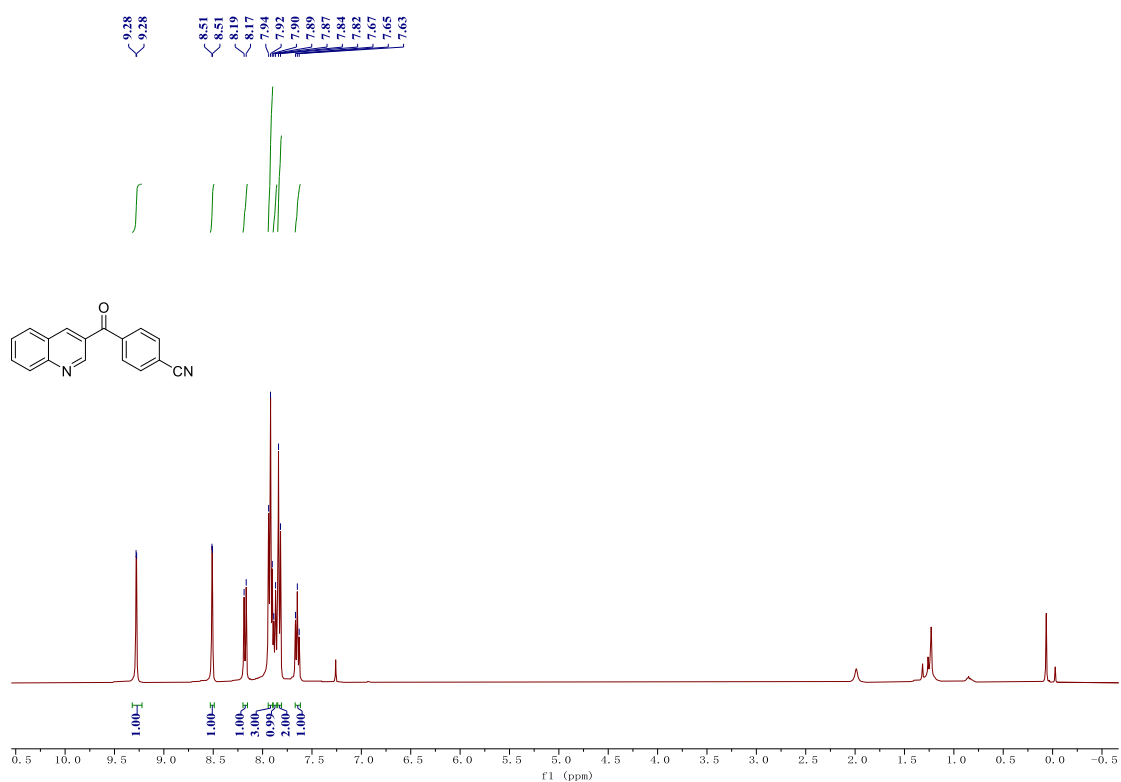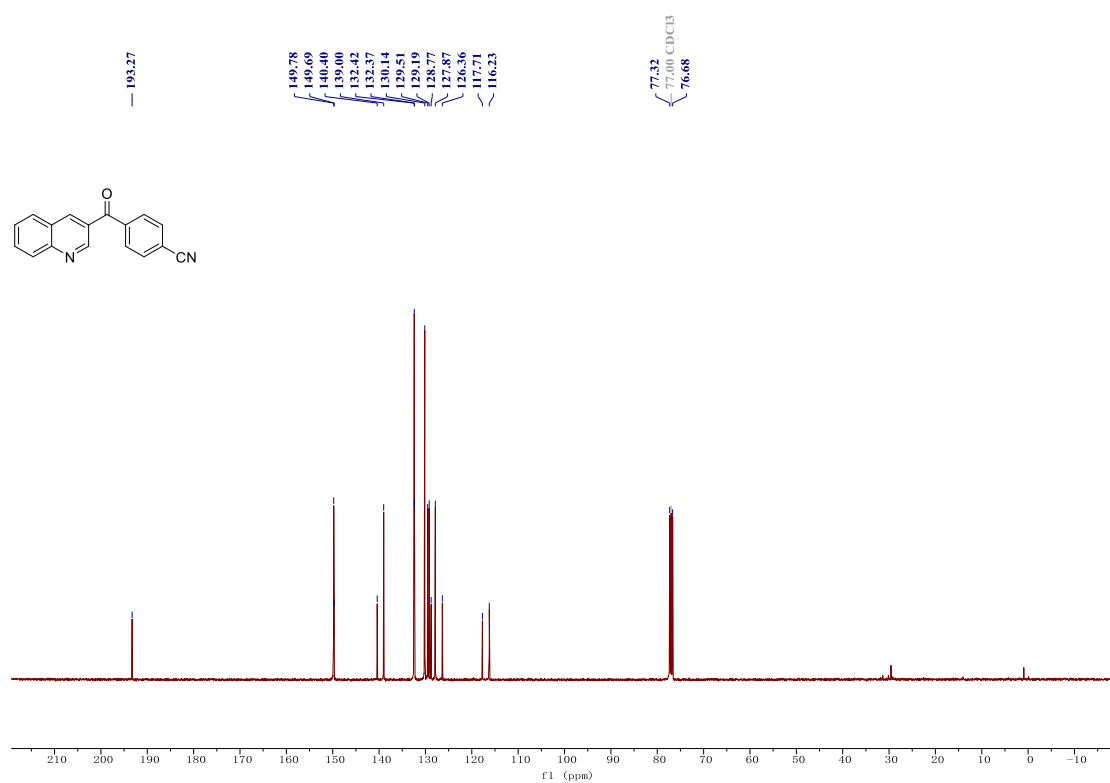

# <sup>1</sup>H NMR and <sup>13</sup>C NMR for **3al**

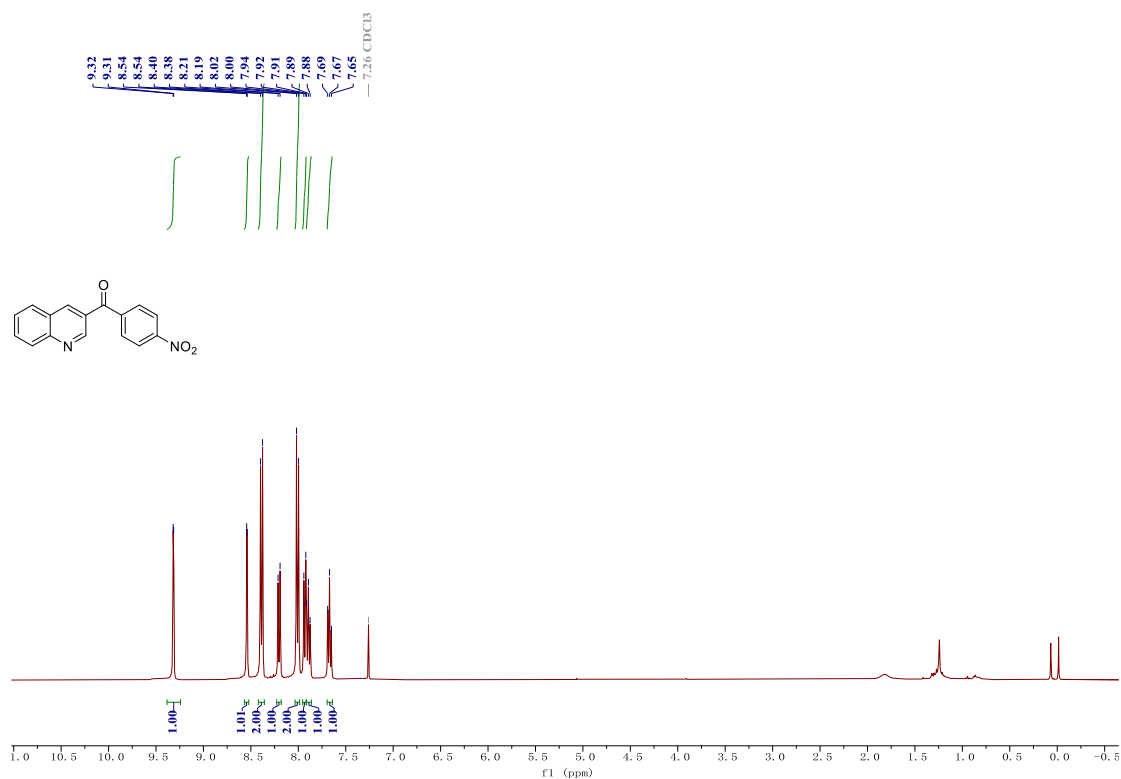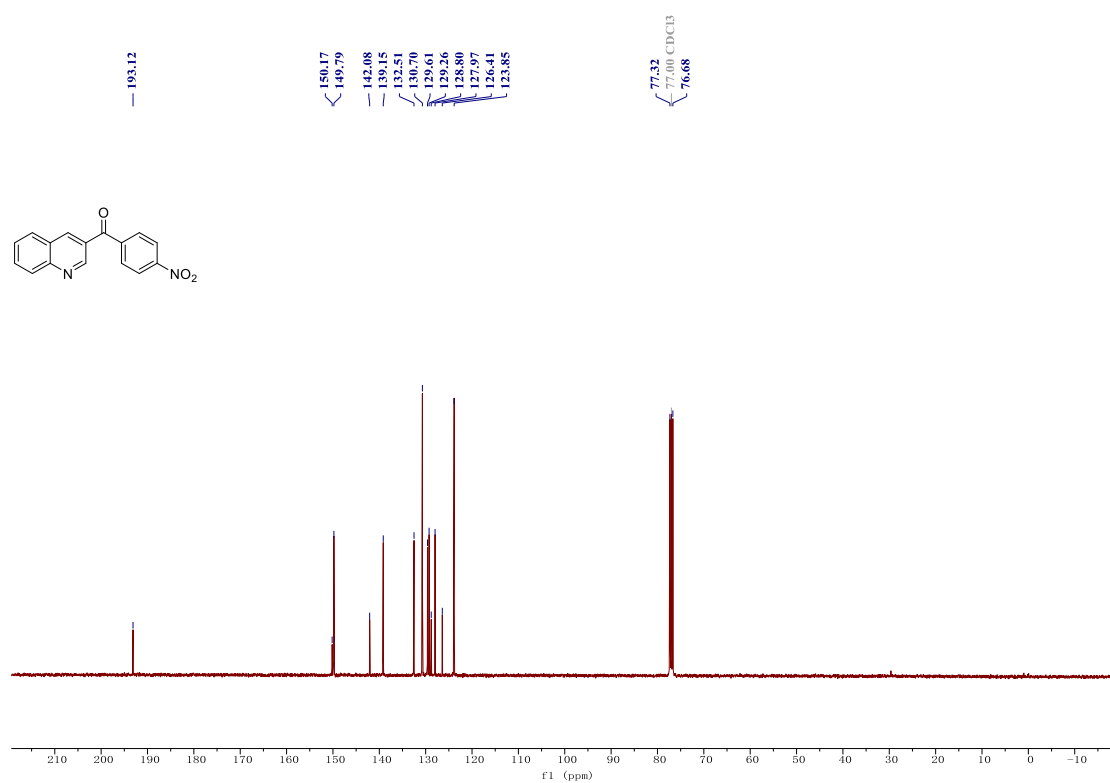

<sup>1</sup>H NMR, <sup>13</sup>C NMR and <sup>19</sup>F NMR for **3am**

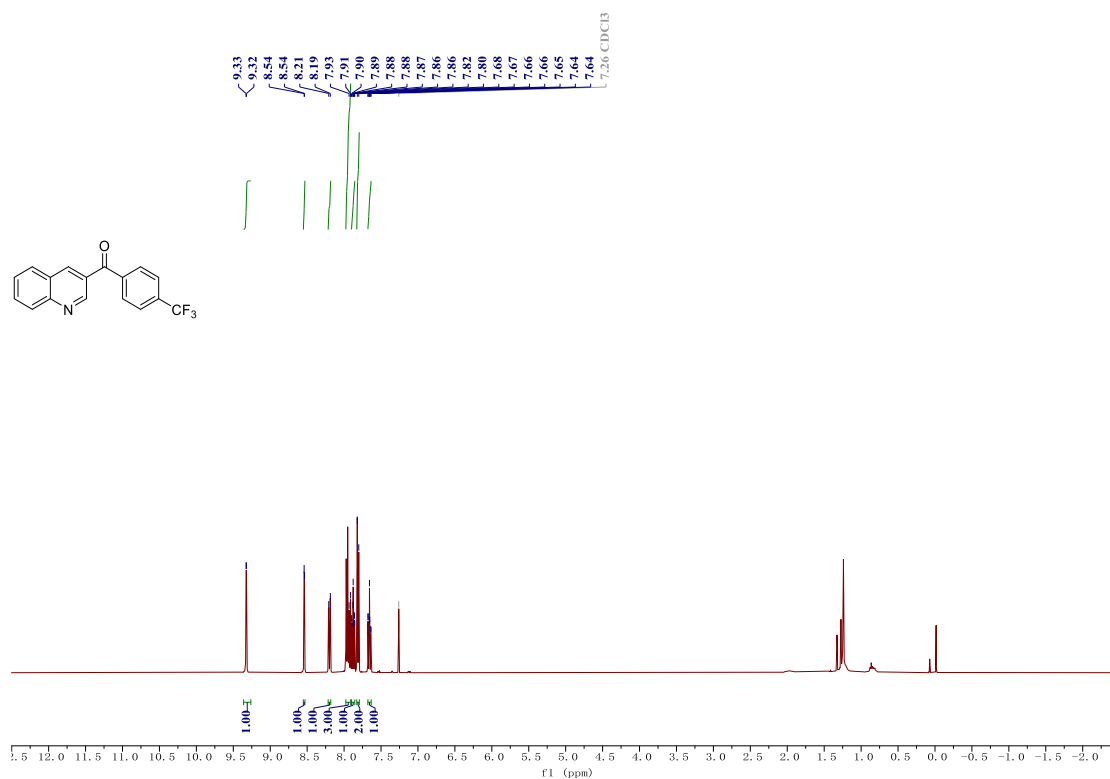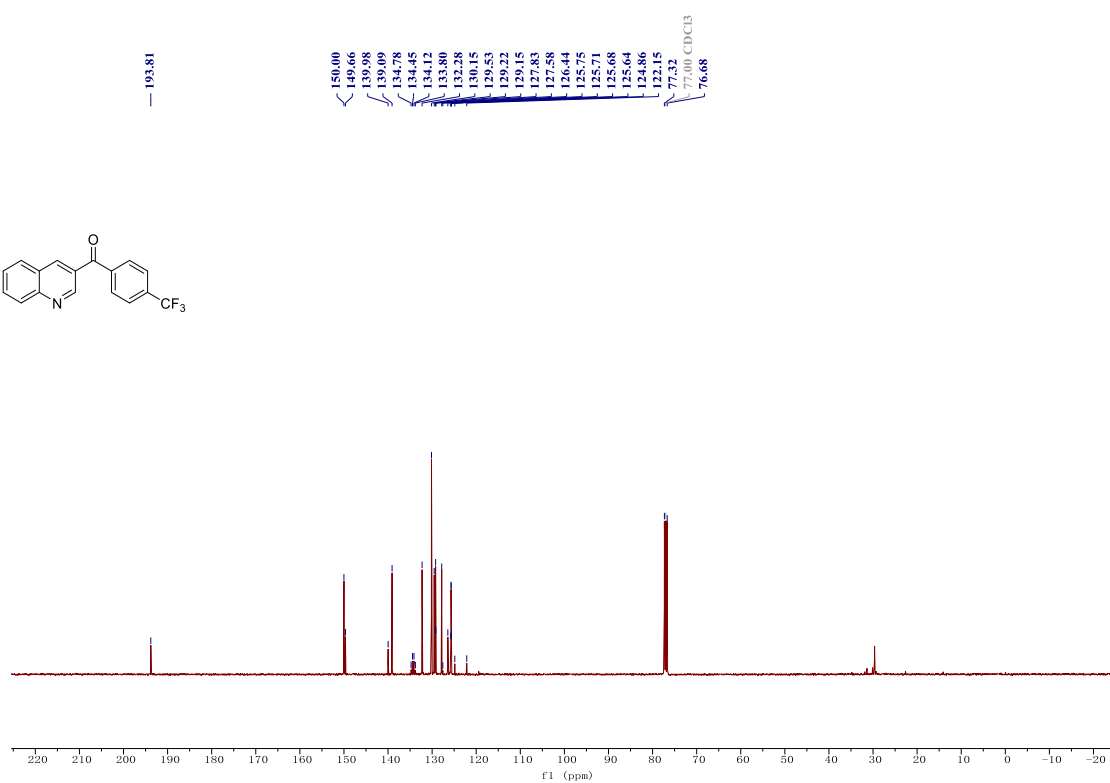

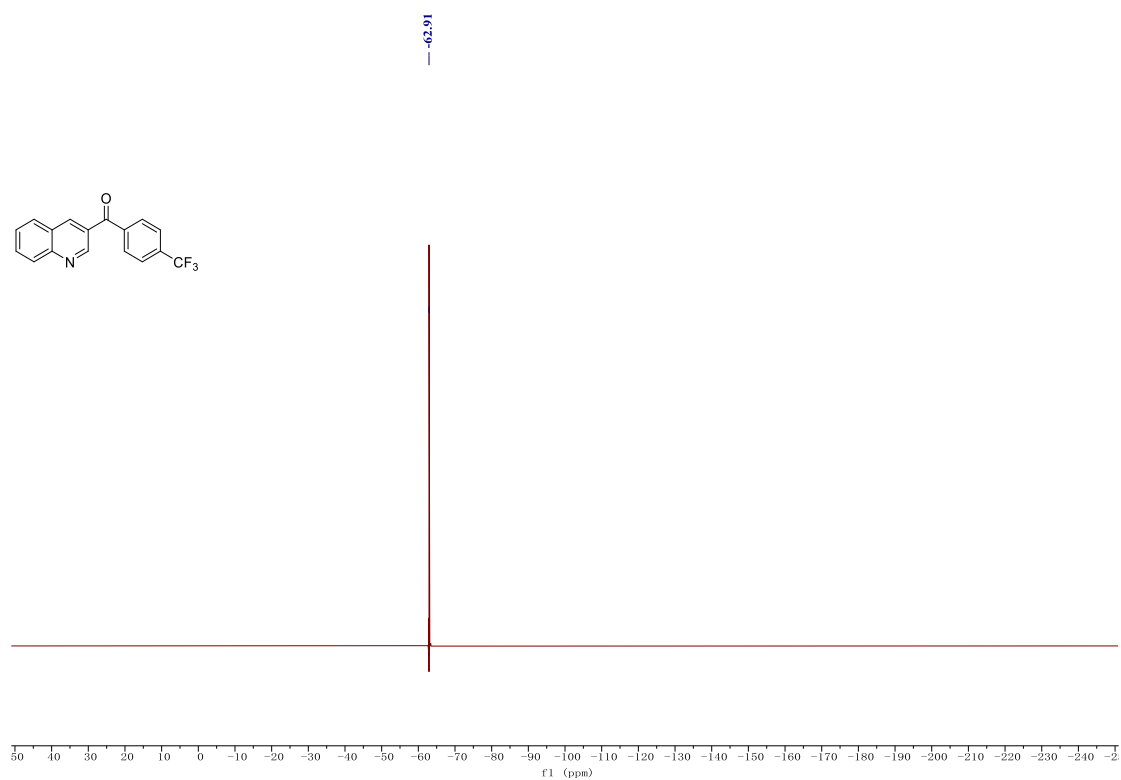

$^1\text{H}$  NMR and  $^{13}\text{C}$  NMR for **3an**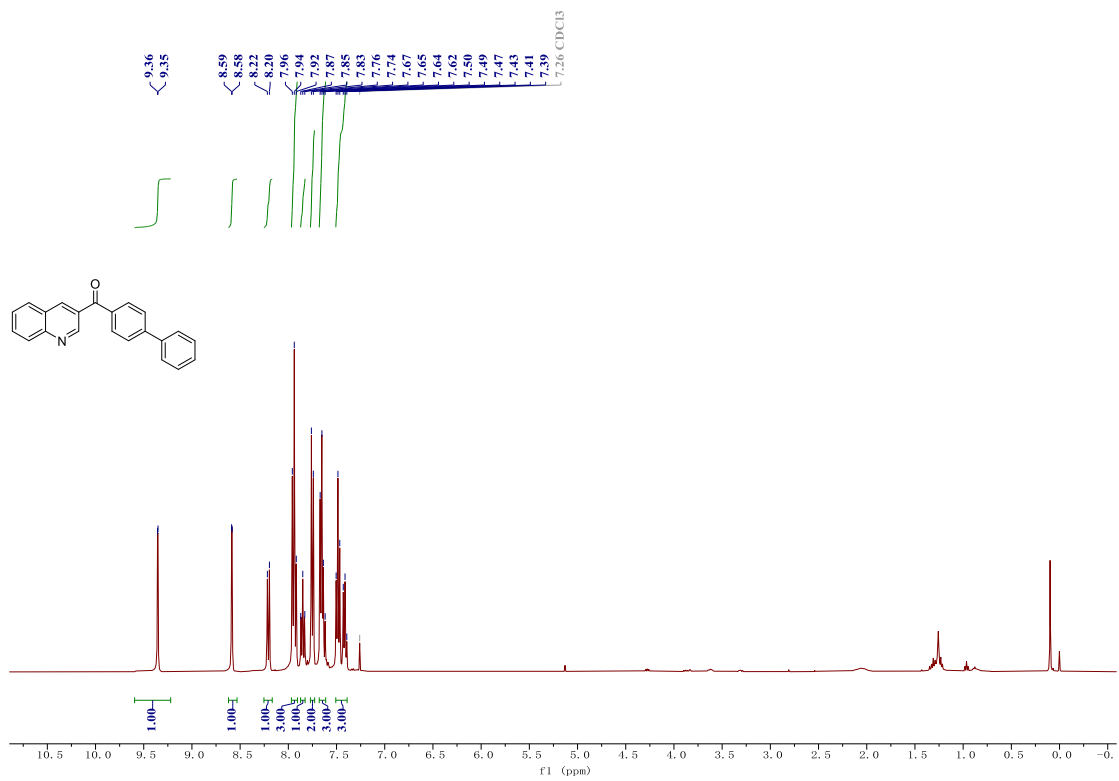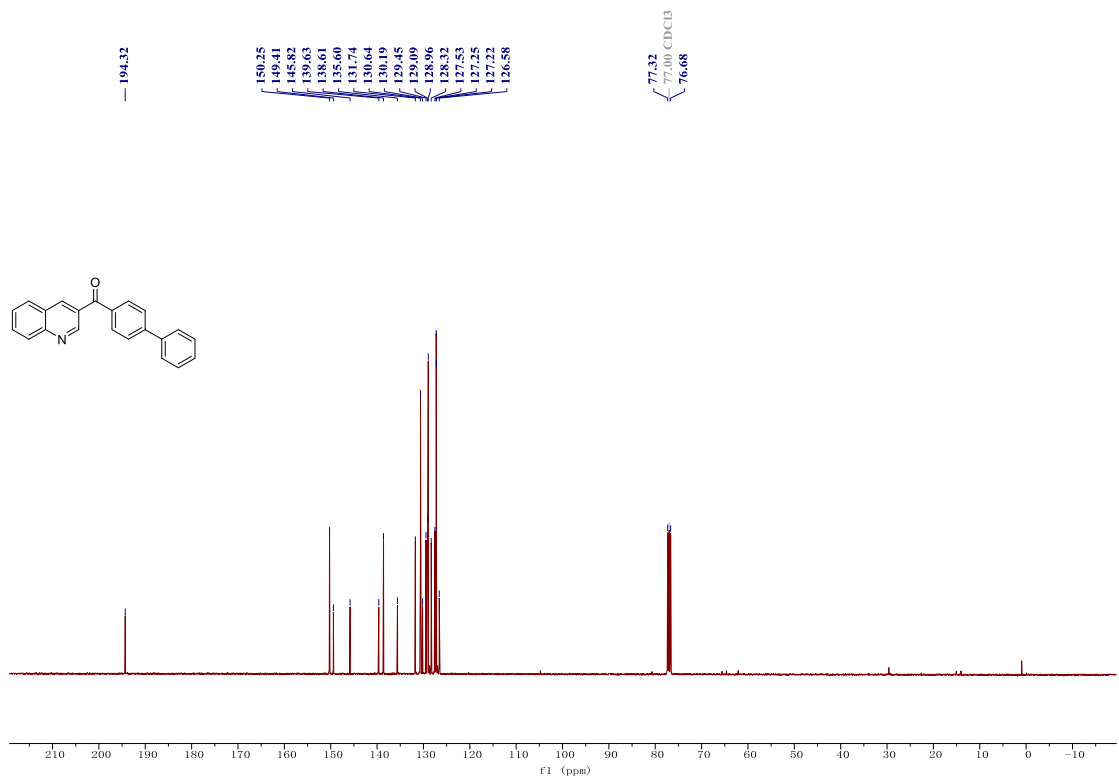

<sup>1</sup>H NMR and <sup>13</sup>C NMR for **3ao**

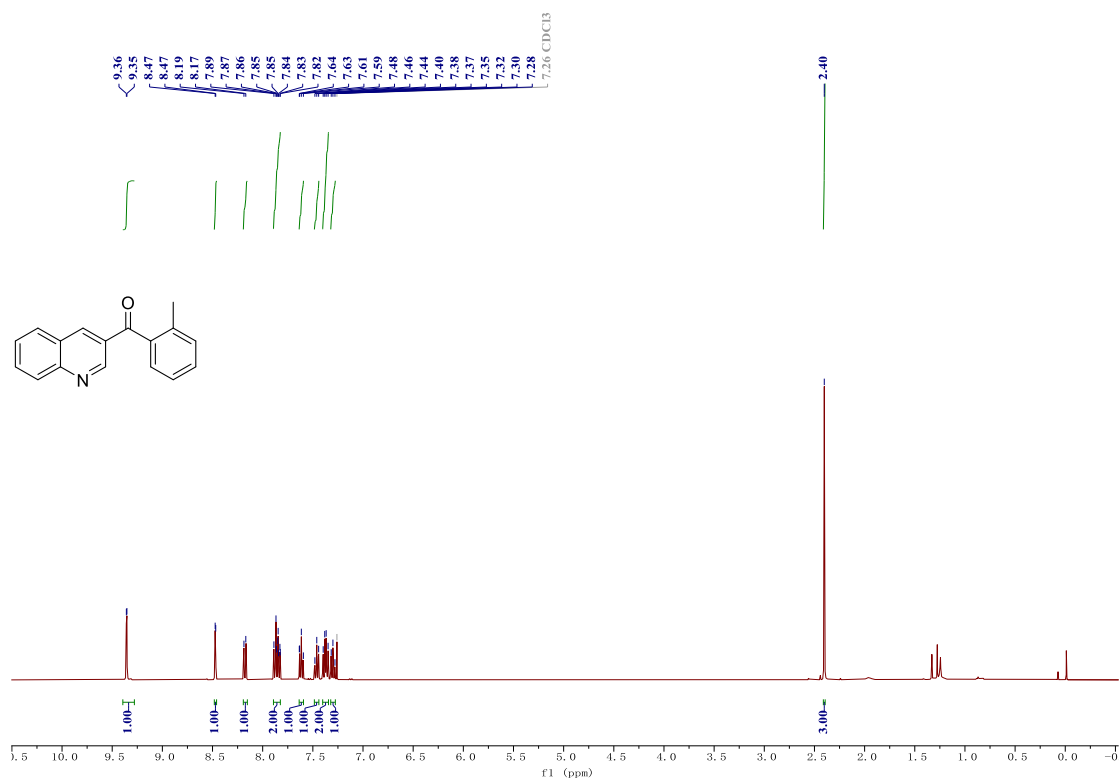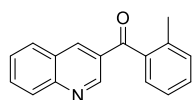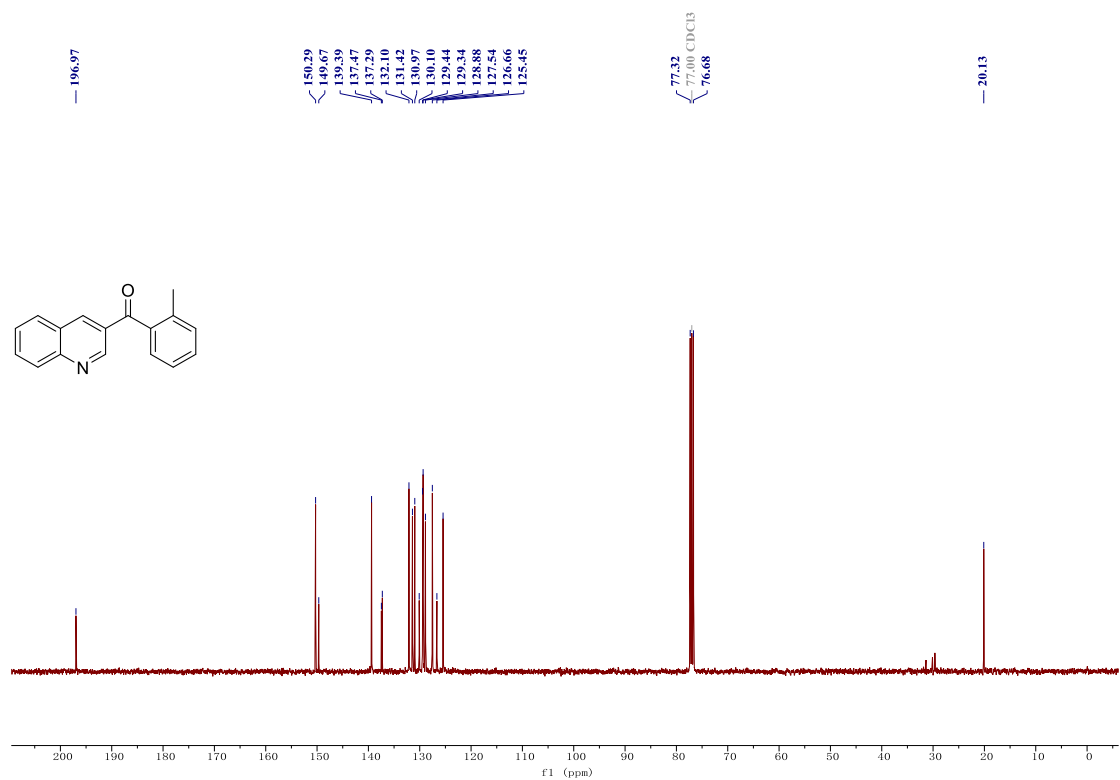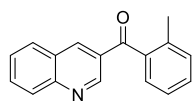

$^1\text{H}$  NMR,  $^{13}\text{C}$  NMR and  $^{19}\text{F}$  NMR for **3ap**

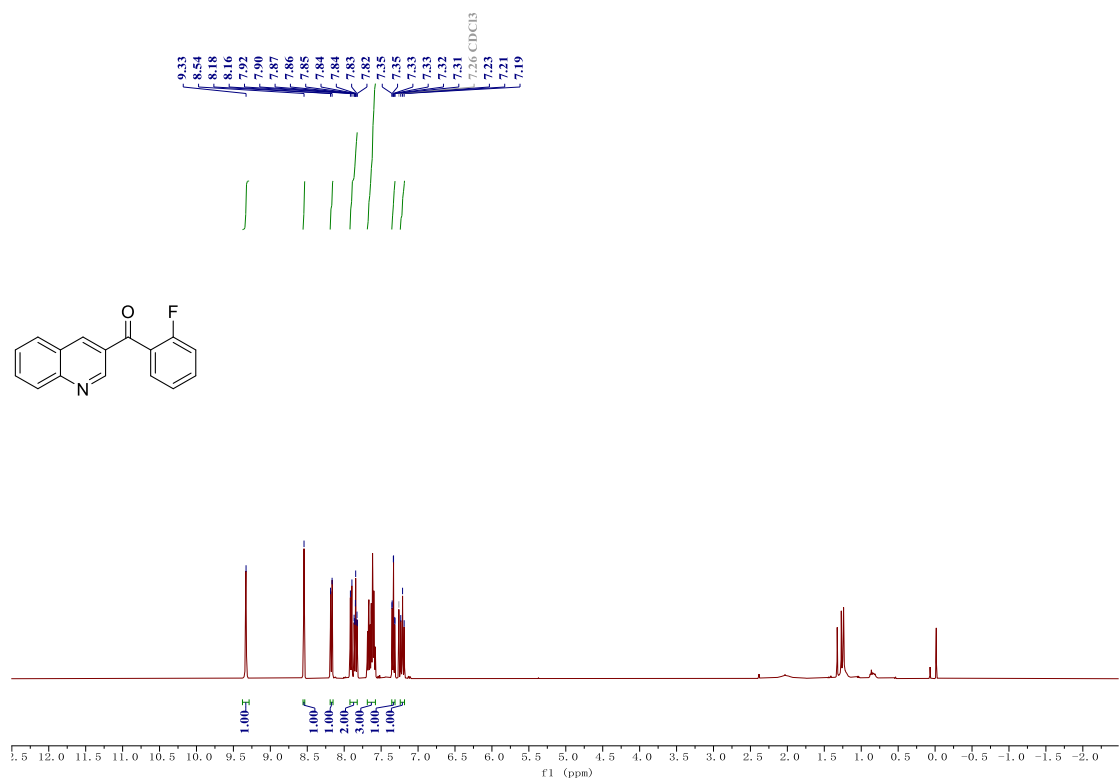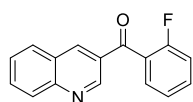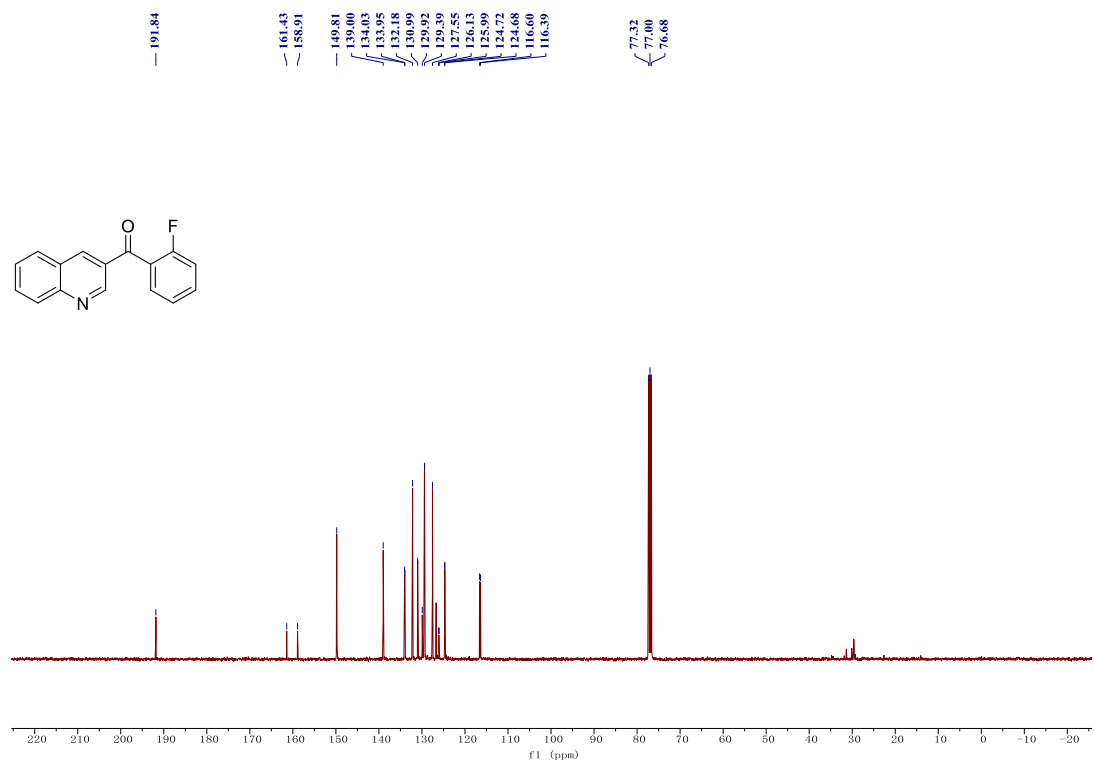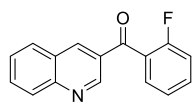

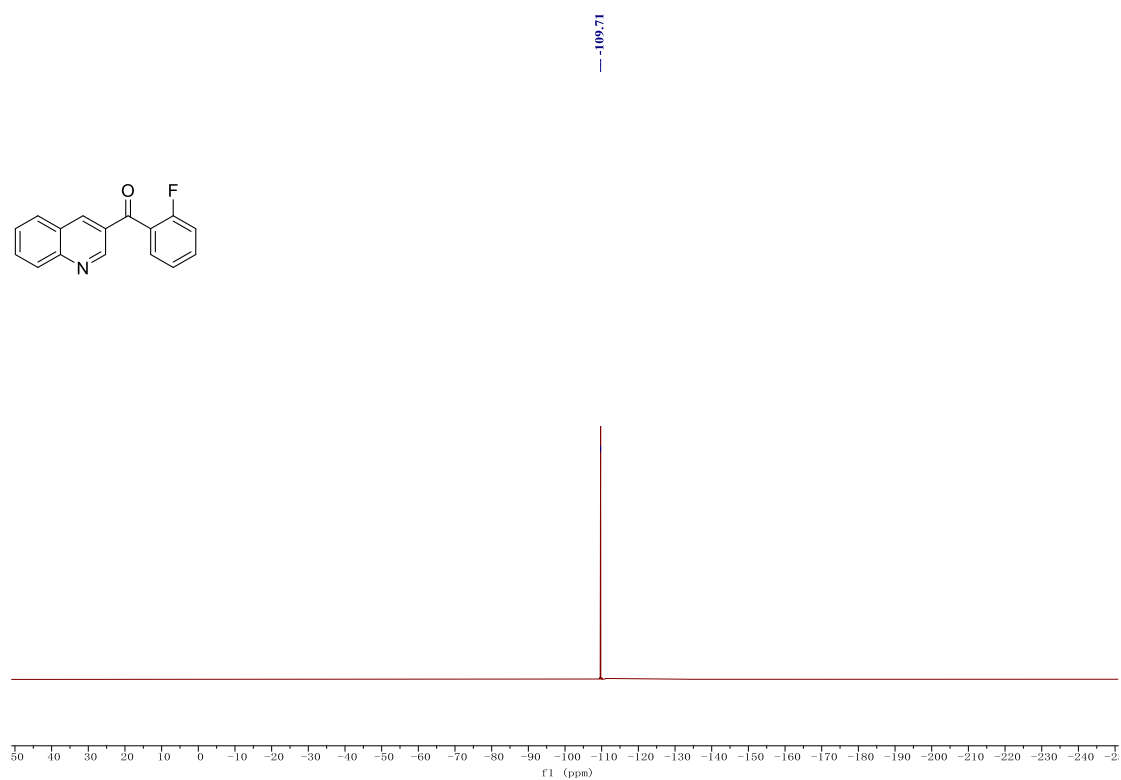

# <sup>1</sup>H NMR and <sup>13</sup>C NMR for **3aq**

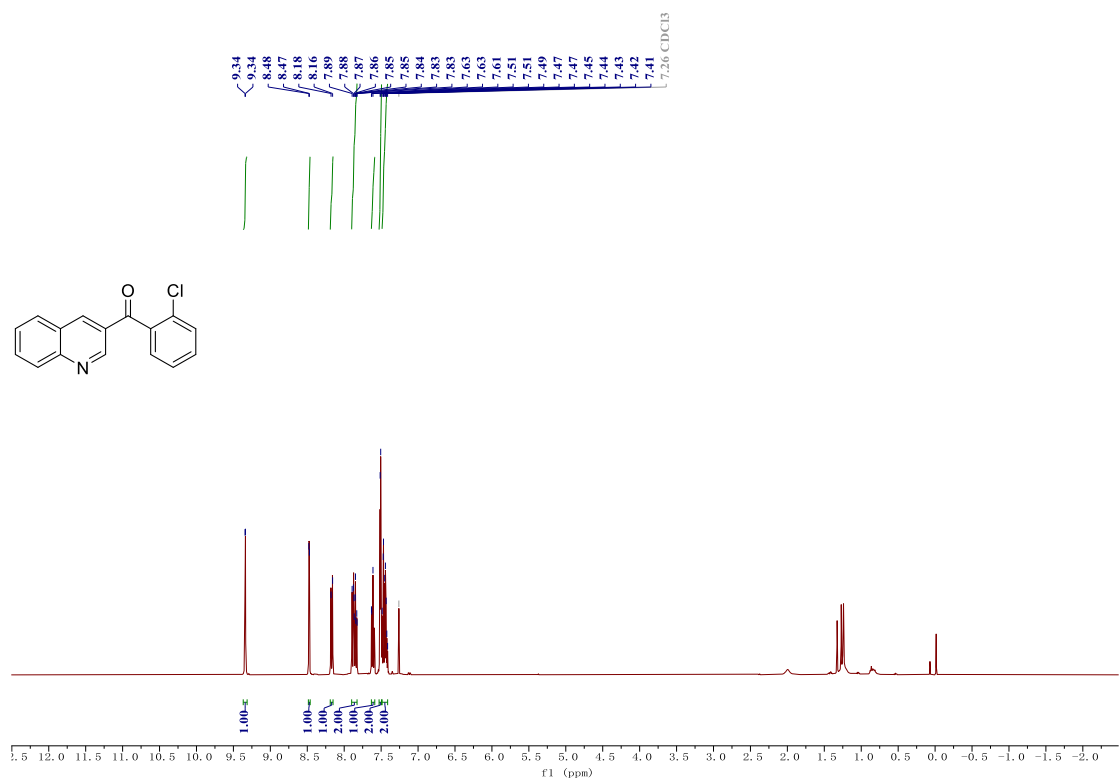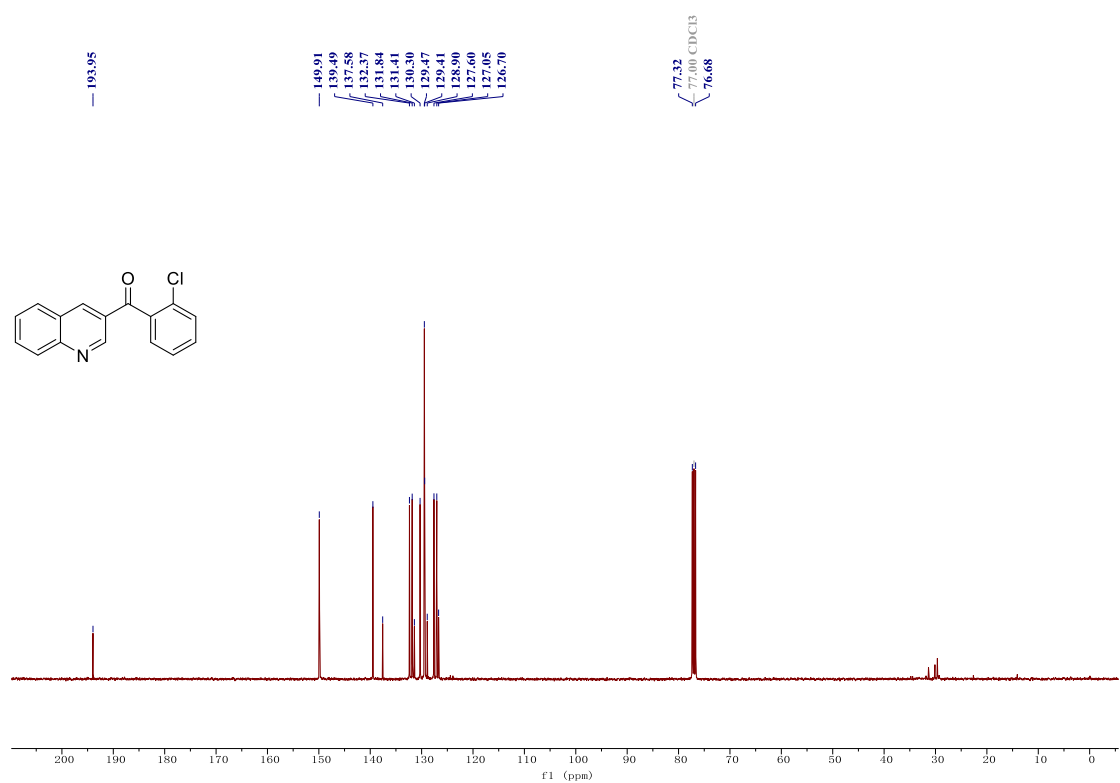

$^1\text{H}$  NMR and  $^{13}\text{C}$  NMR for **3ar**

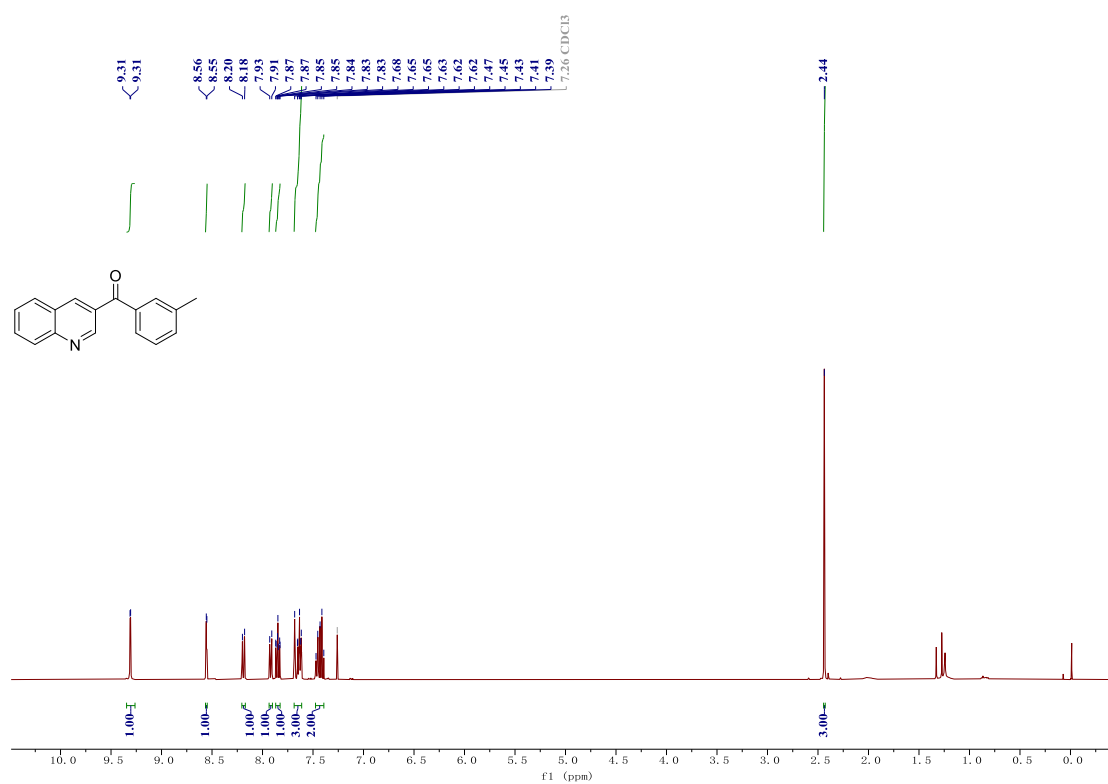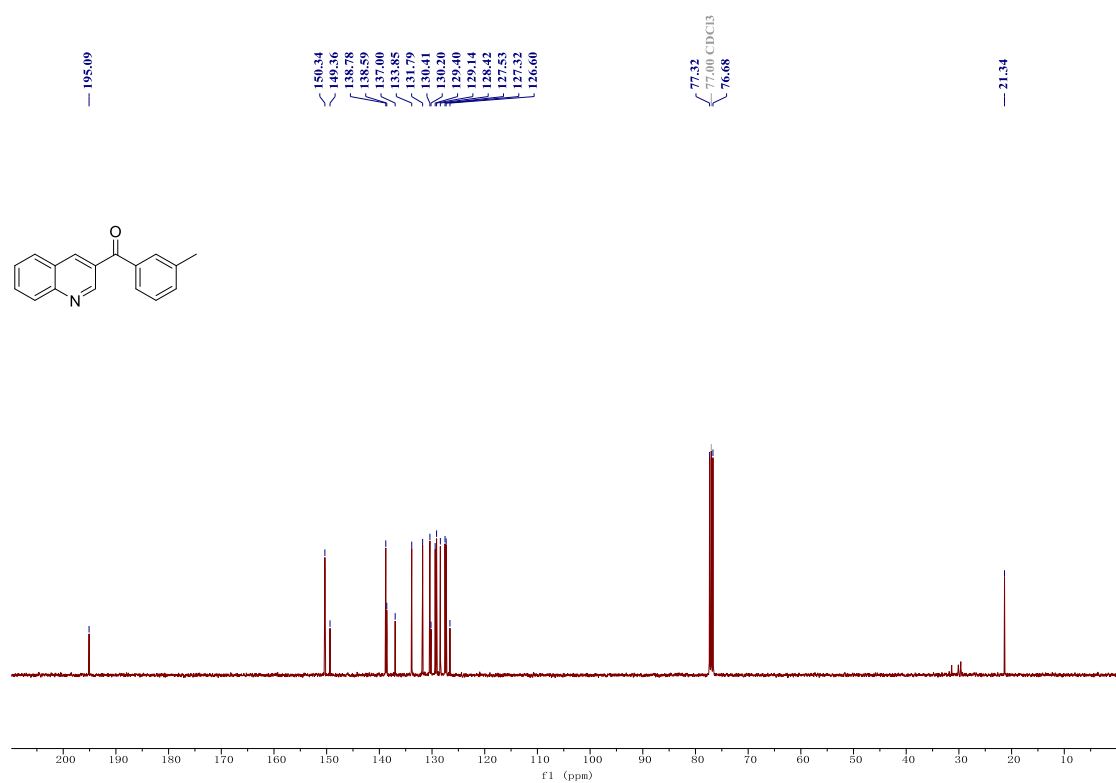

<sup>1</sup>H NMR and <sup>13</sup>C NMR for **3as**

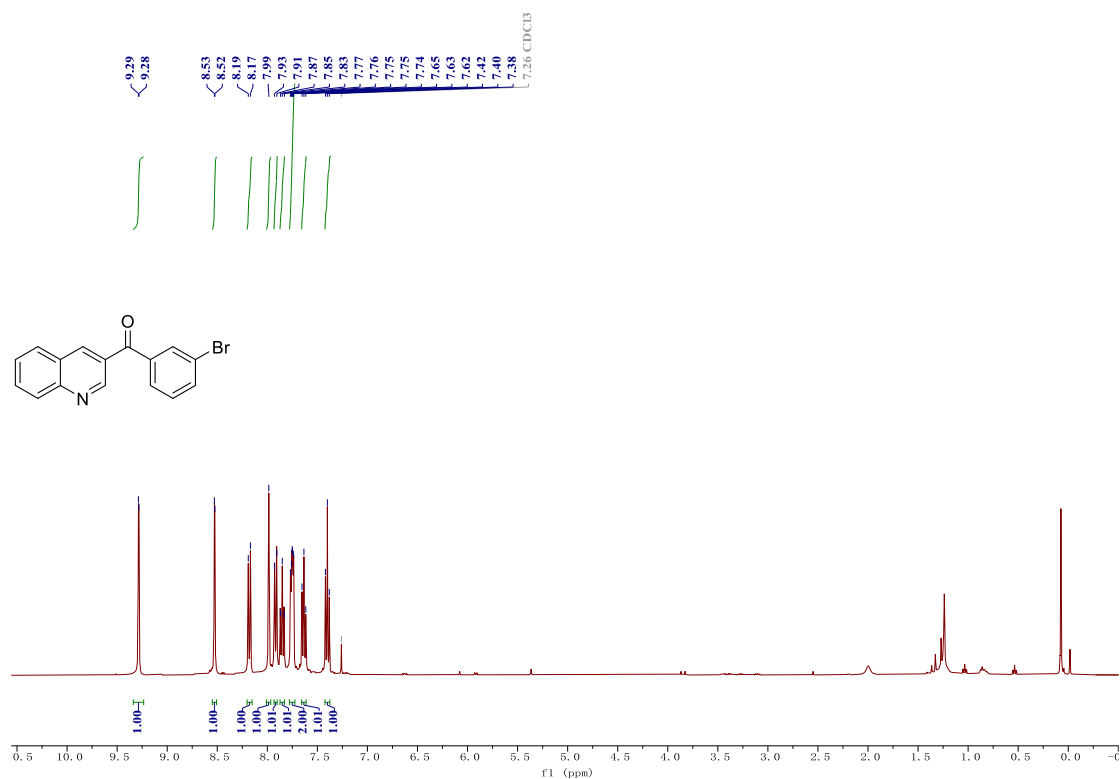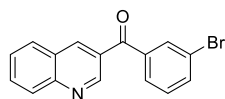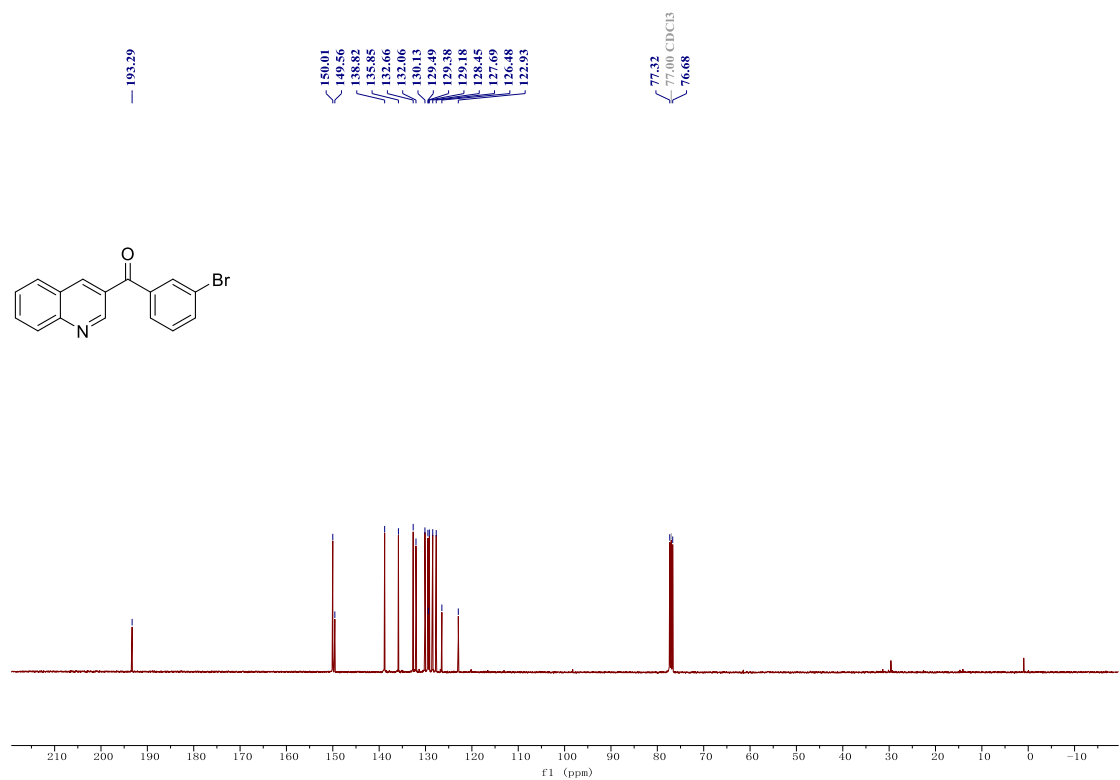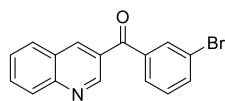

<sup>1</sup>H NMR and <sup>13</sup>C NMR for **3at**

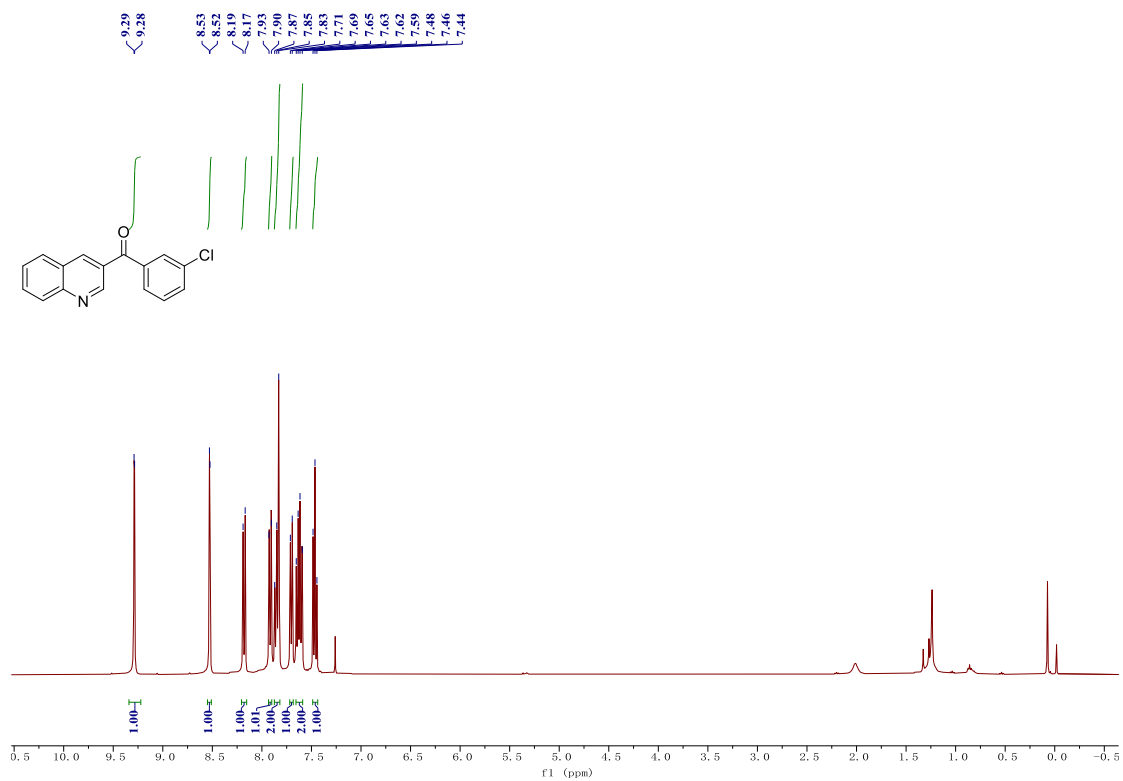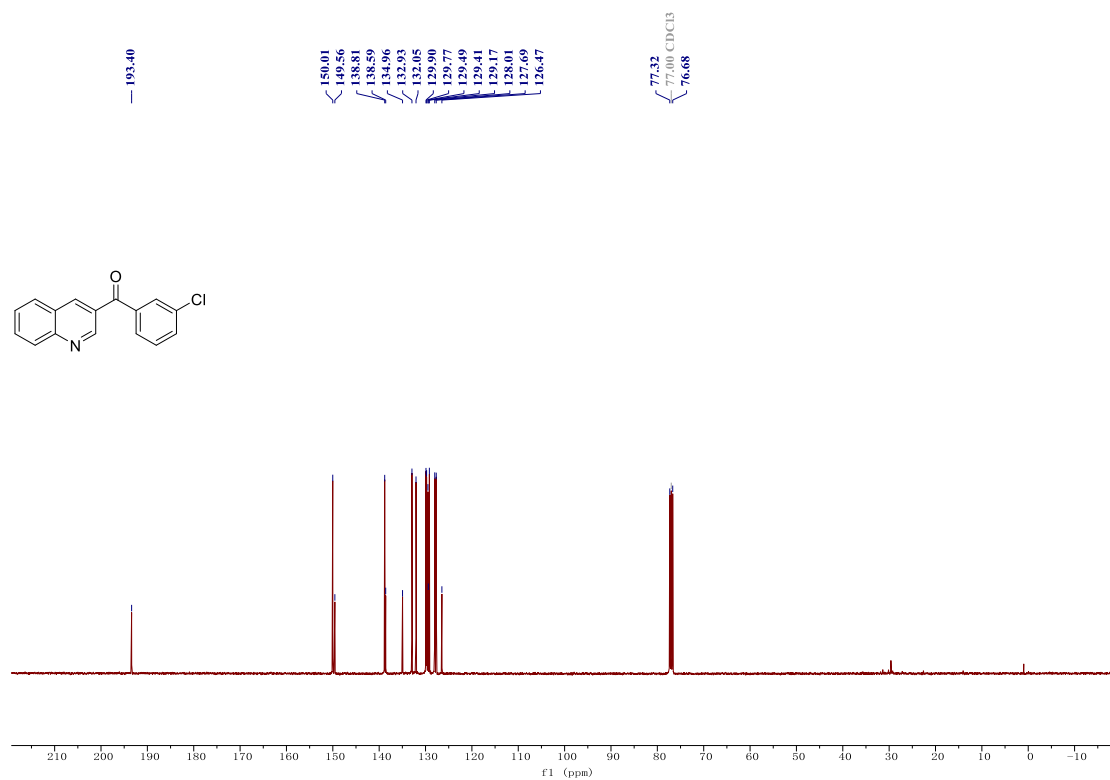

<sup>1</sup>H NMR and <sup>13</sup>C NMR for **3au**

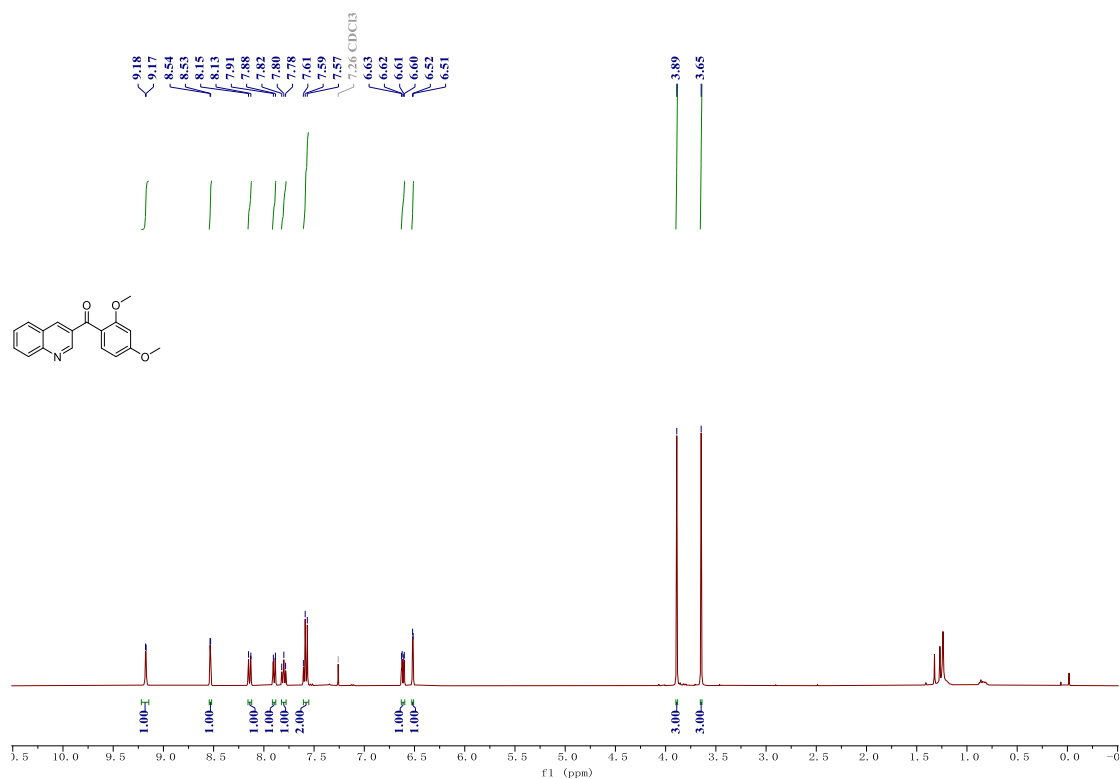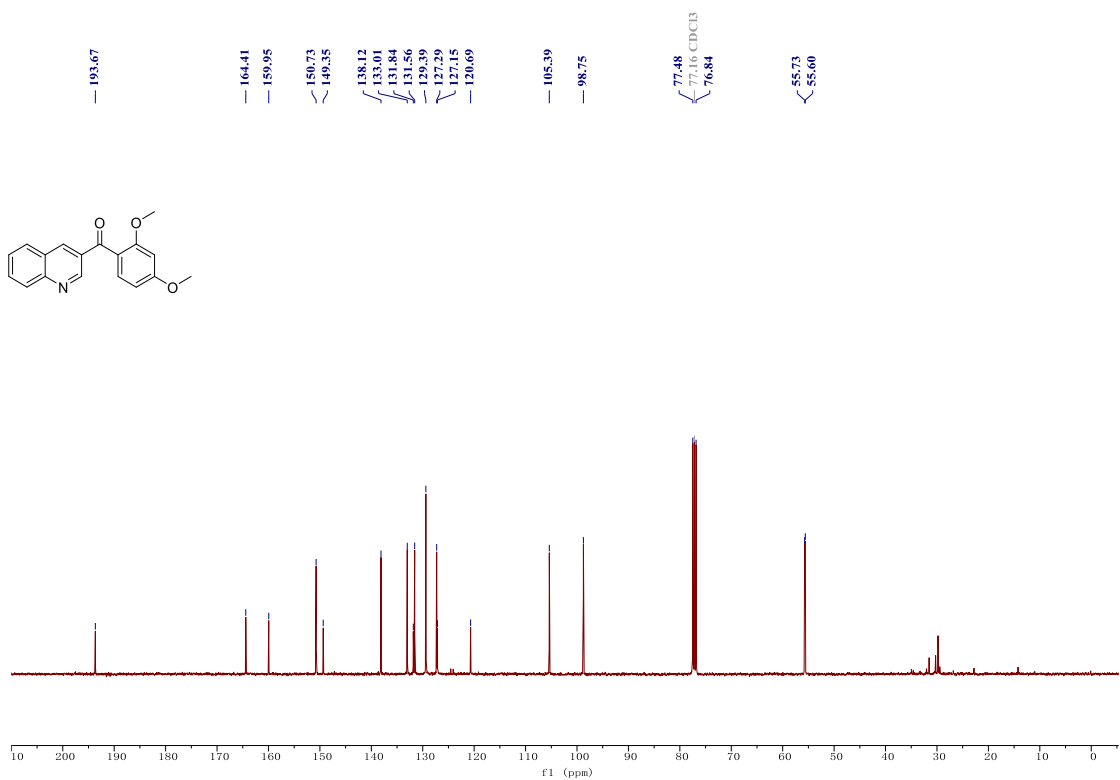

<sup>1</sup>H NMR, <sup>13</sup>C NMR and <sup>19</sup>F NMR for **3av**

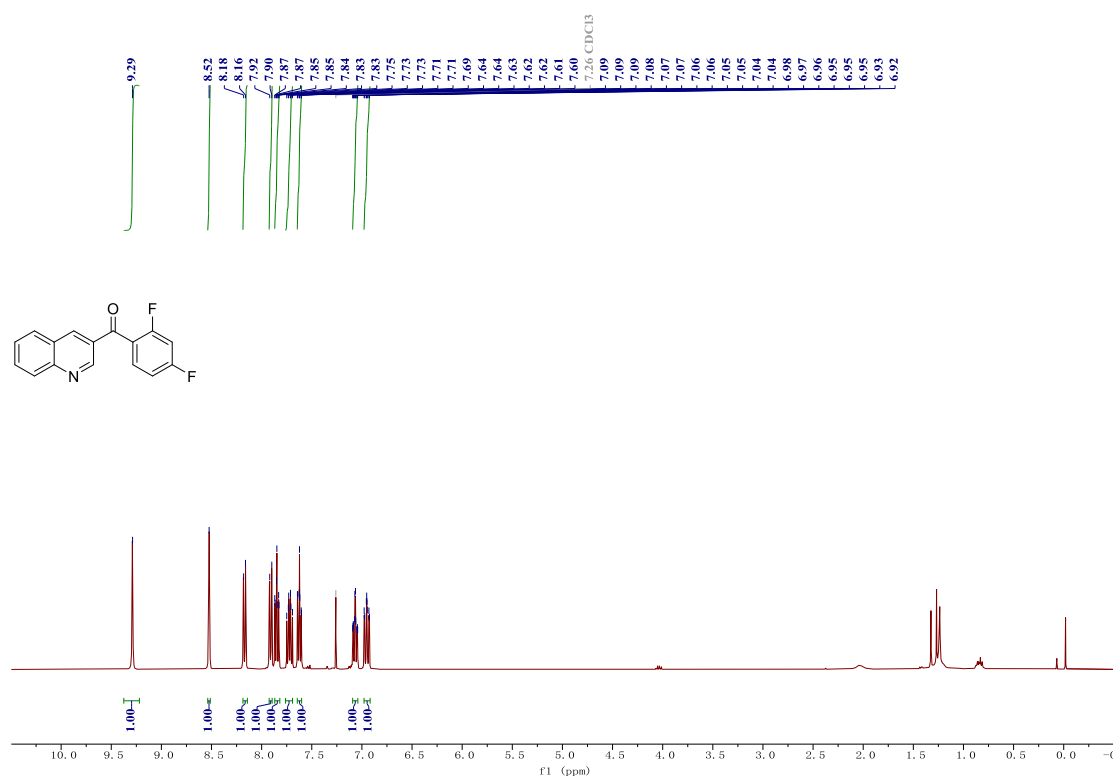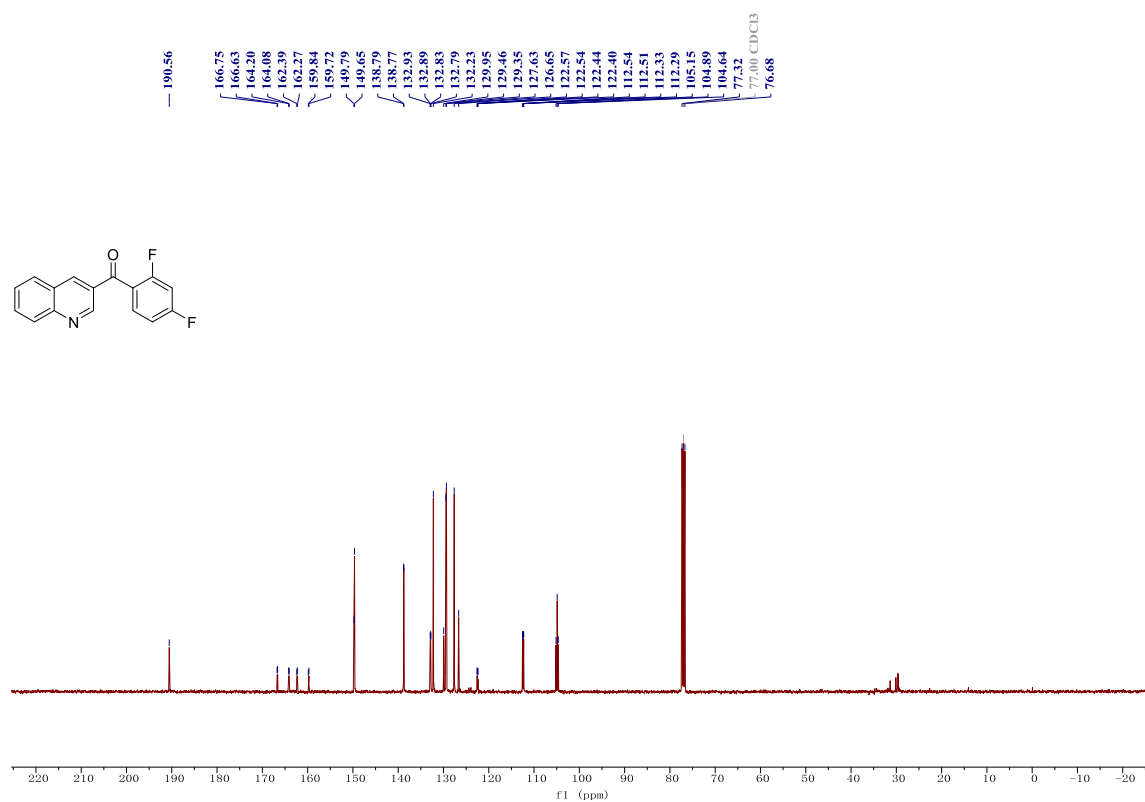

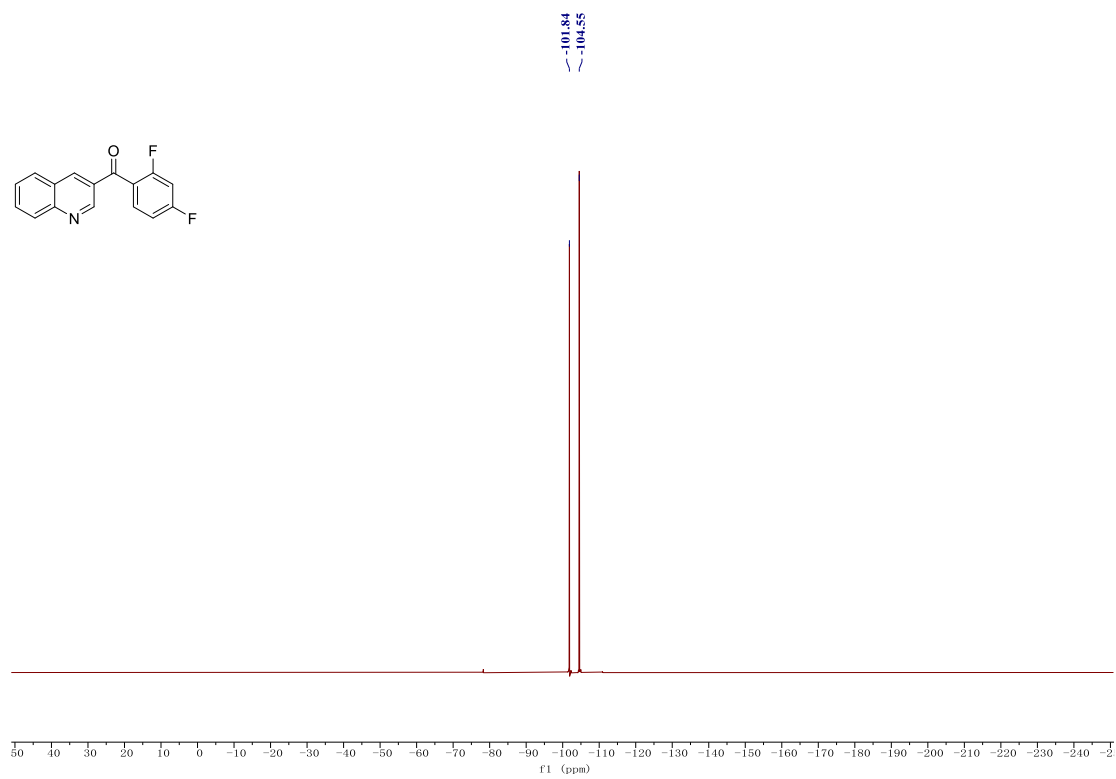

<sup>1</sup>H NMR and <sup>13</sup>C NMR for **3aw**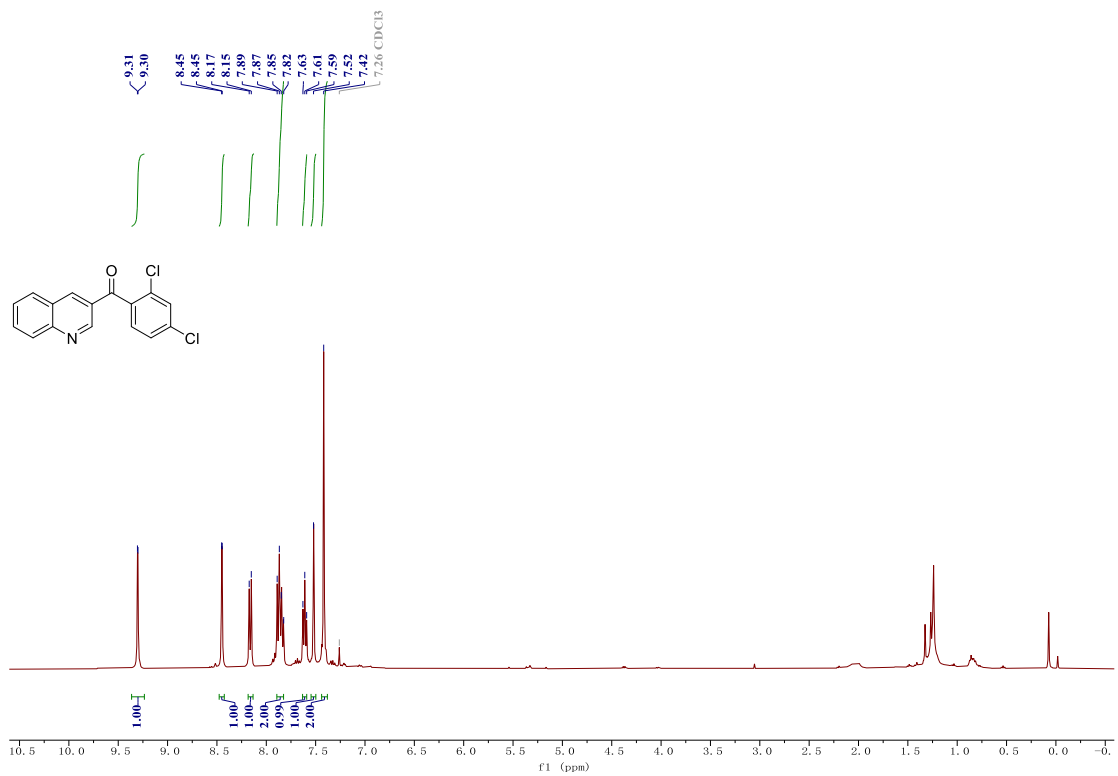

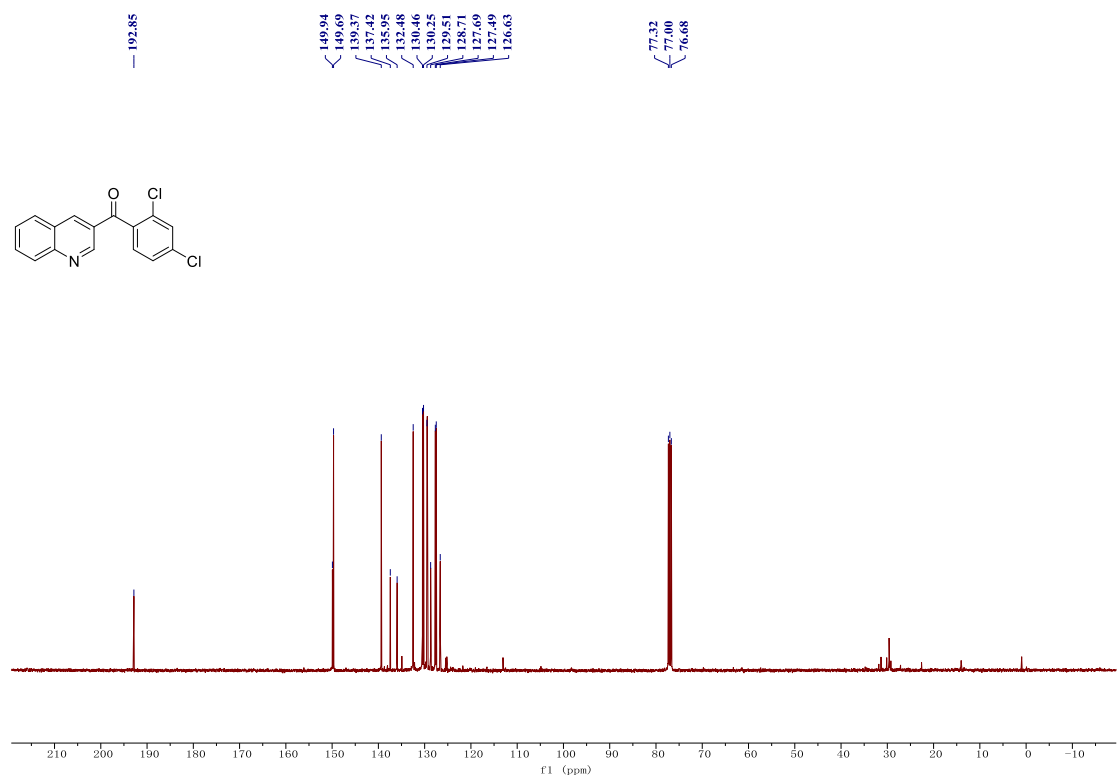

<sup>1</sup>H NMR and <sup>13</sup>C NMR for **3ax**

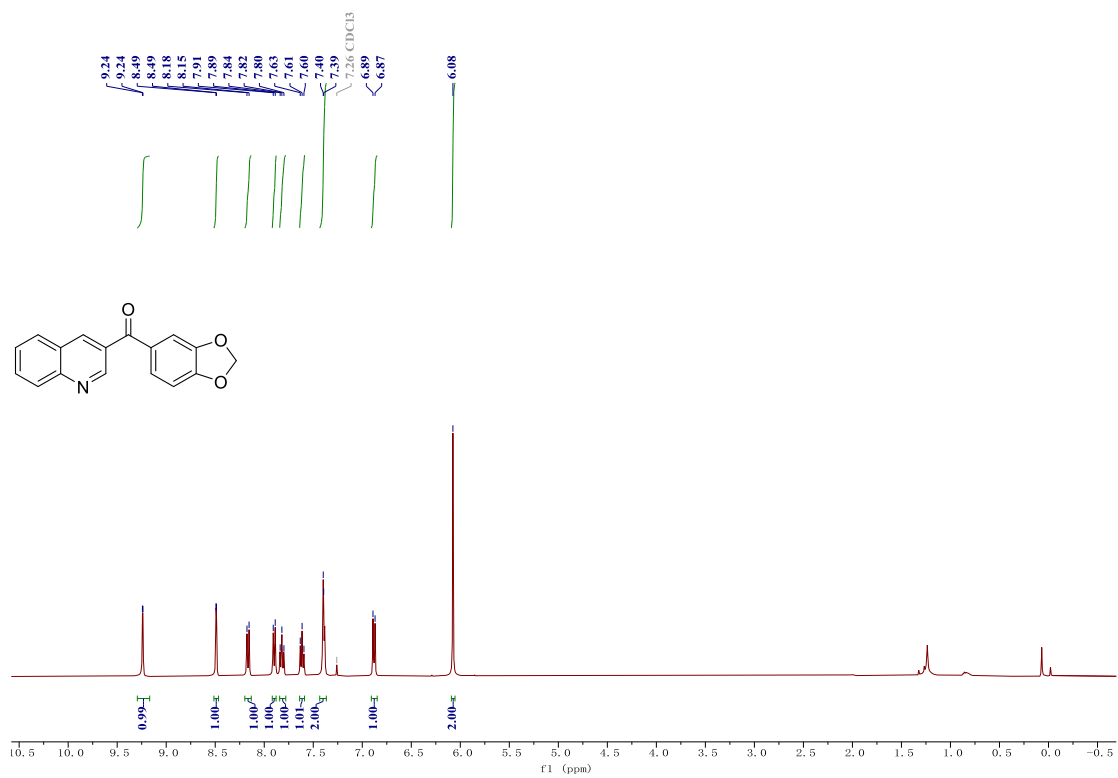

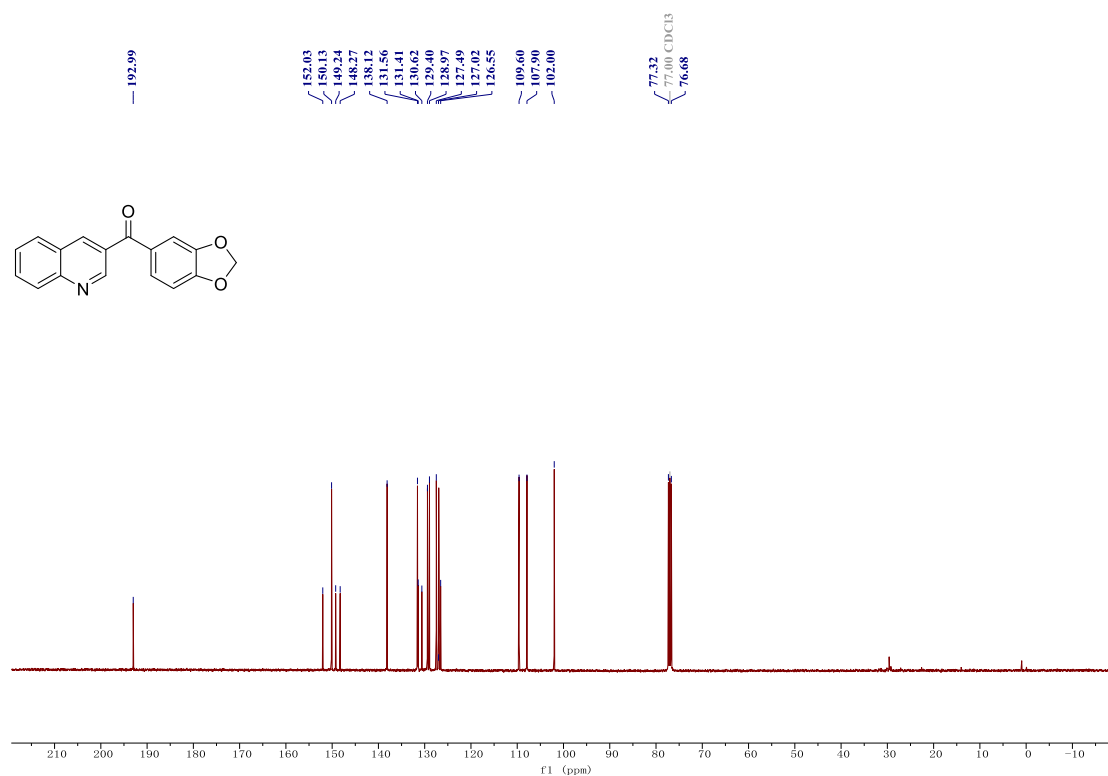

# **<sup>1</sup>H NMR and <sup>13</sup>C NMR for 3ay**

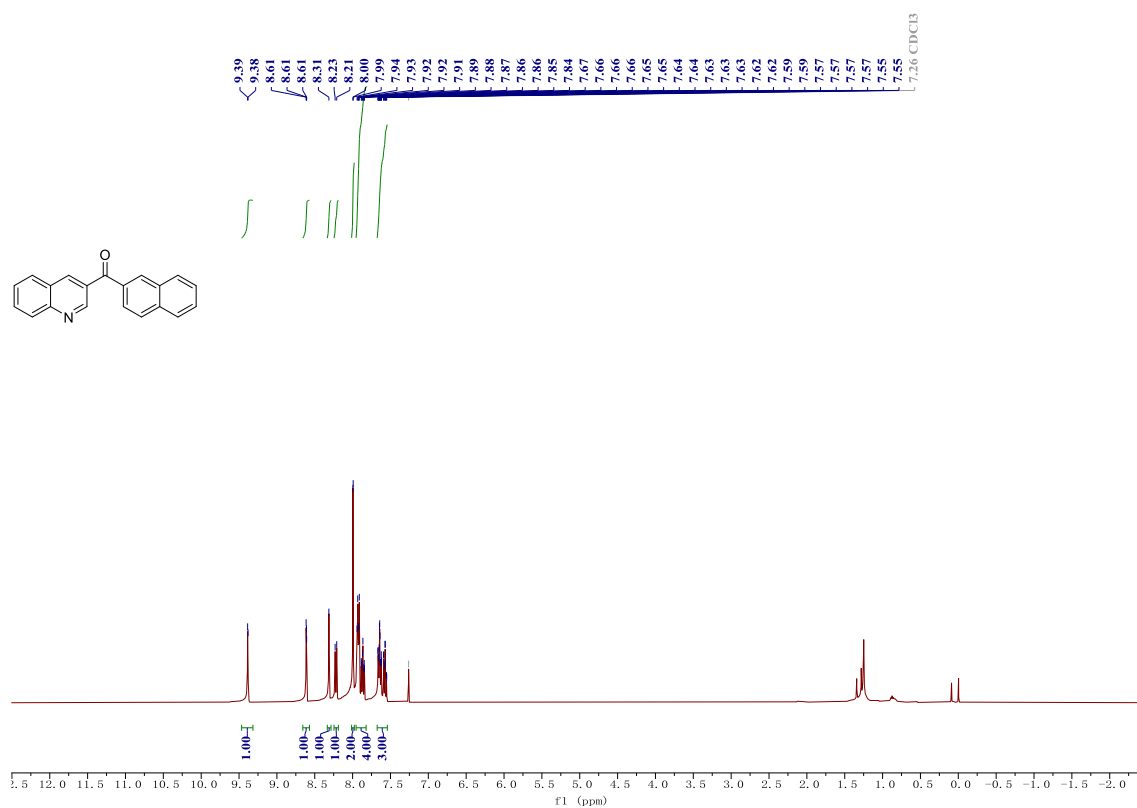

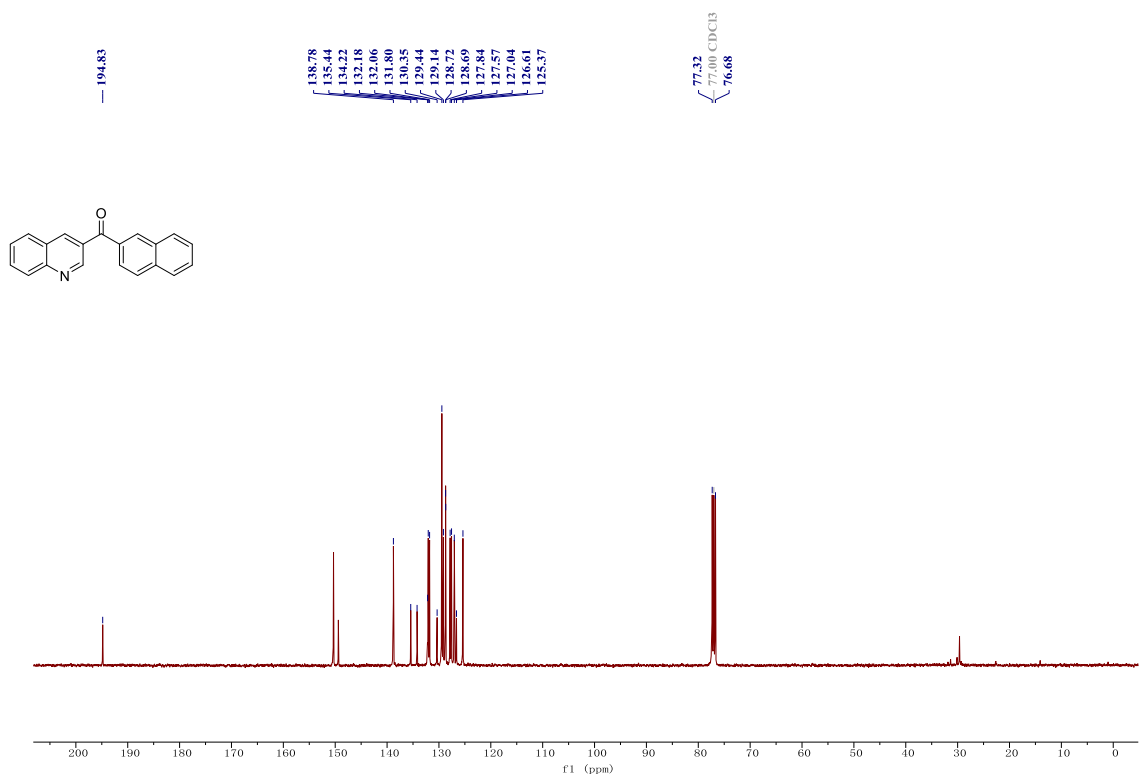

# <sup>1</sup>H NMR and <sup>13</sup>C NMR for 3az

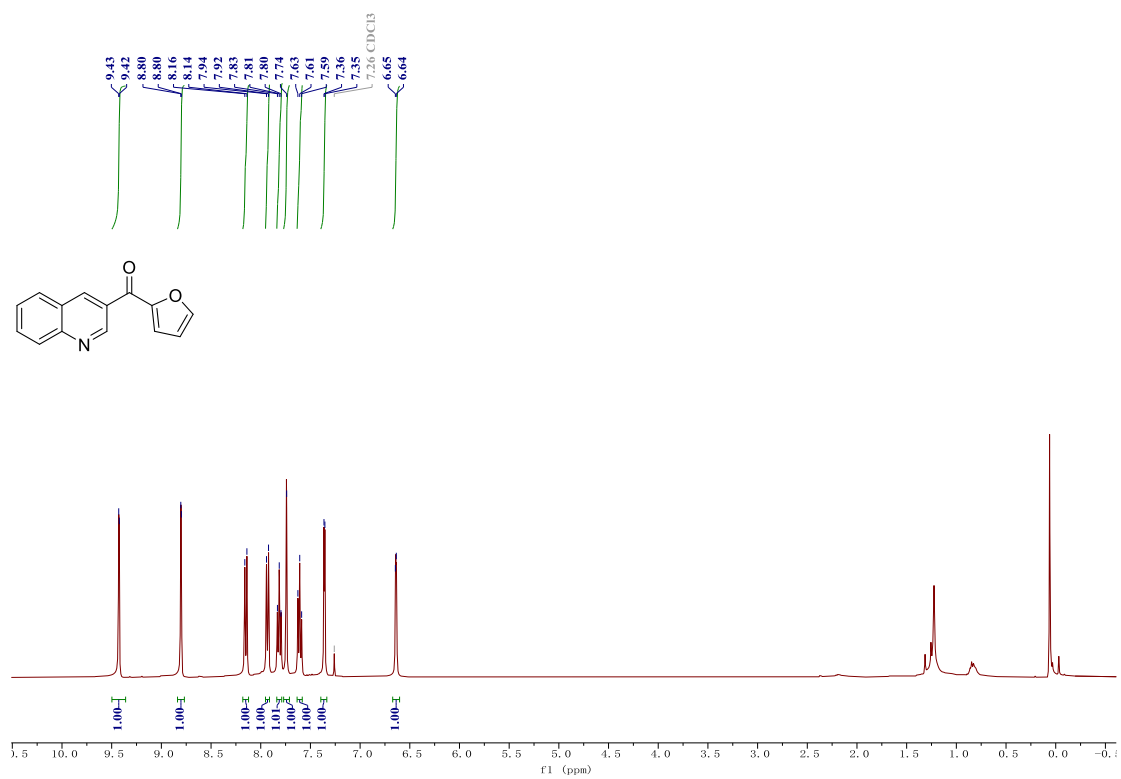

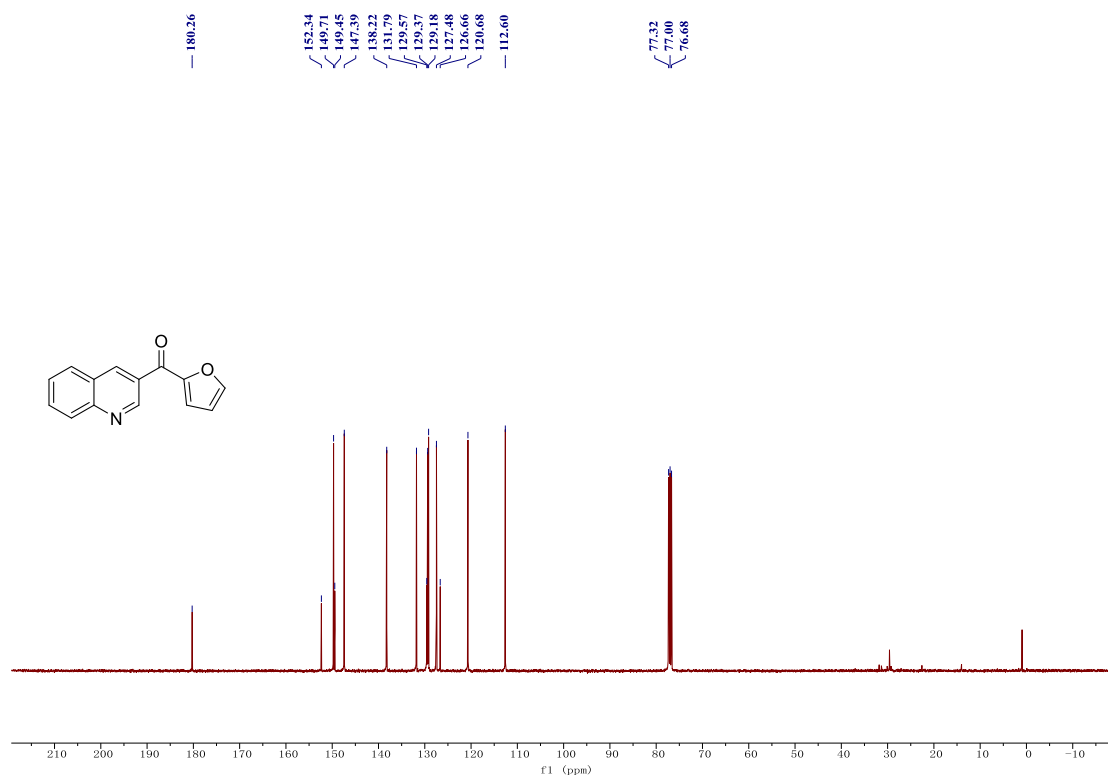

<sup>1</sup>H NMR and <sup>13</sup>C NMR for **3az'**

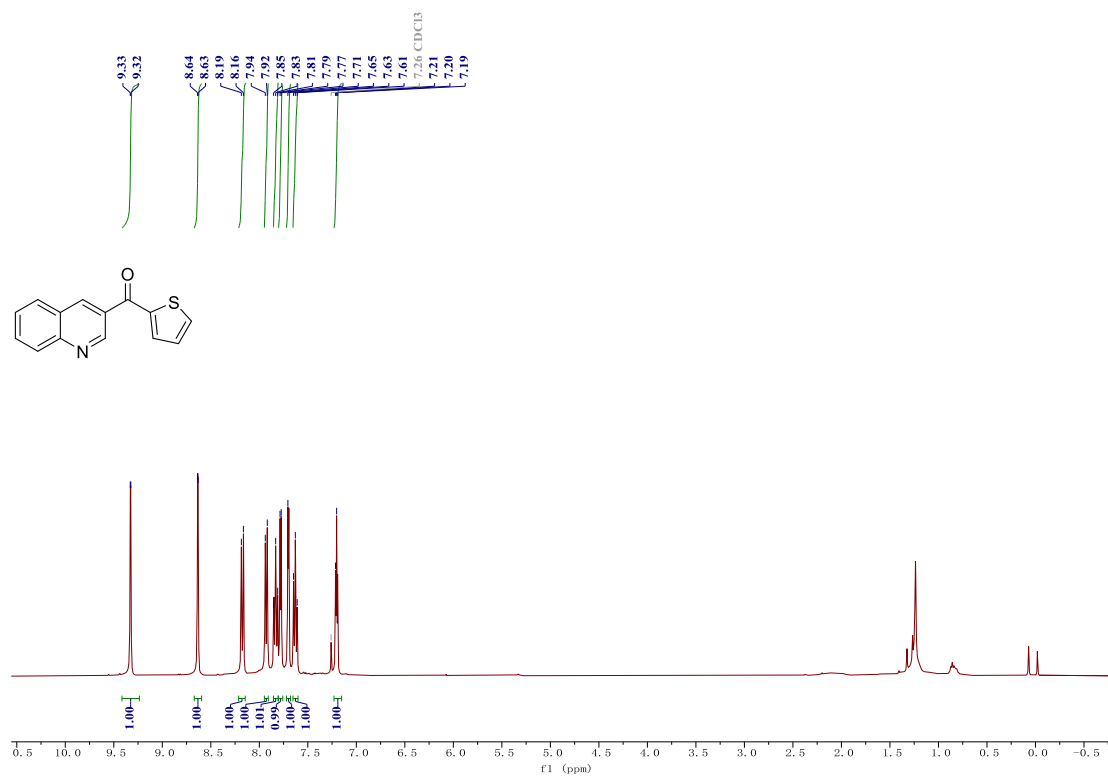

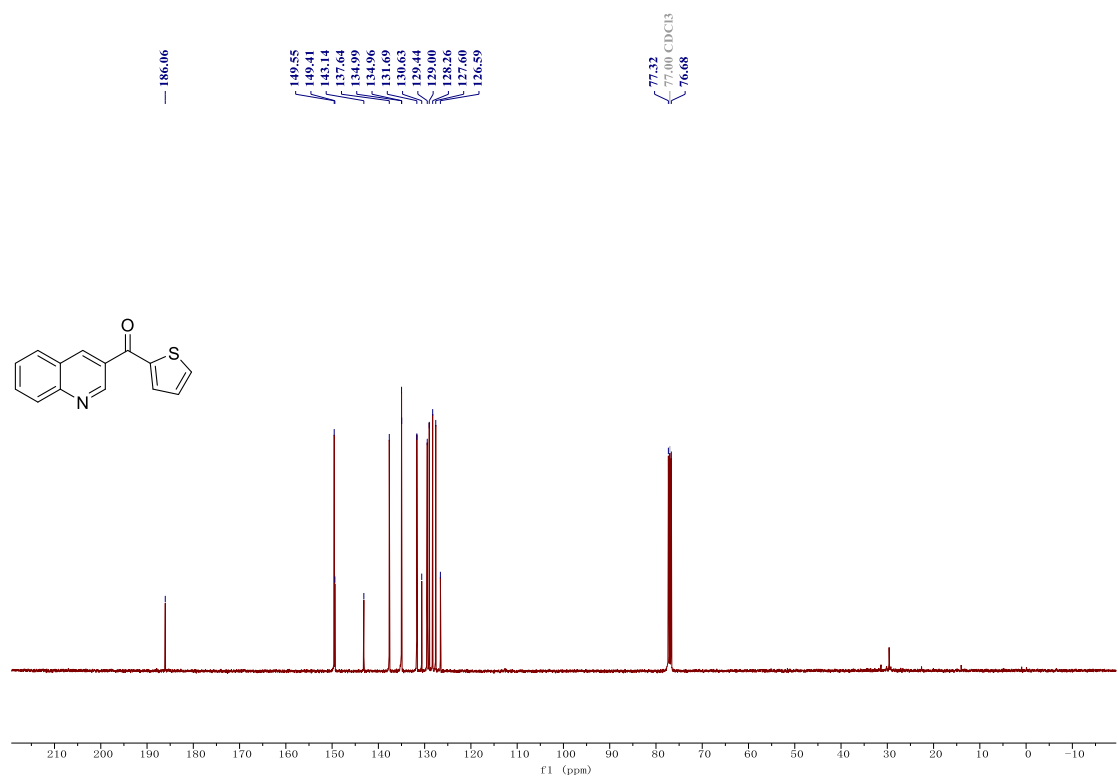

# <sup>1</sup>H NMR and <sup>13</sup>C NMR for **3ba**

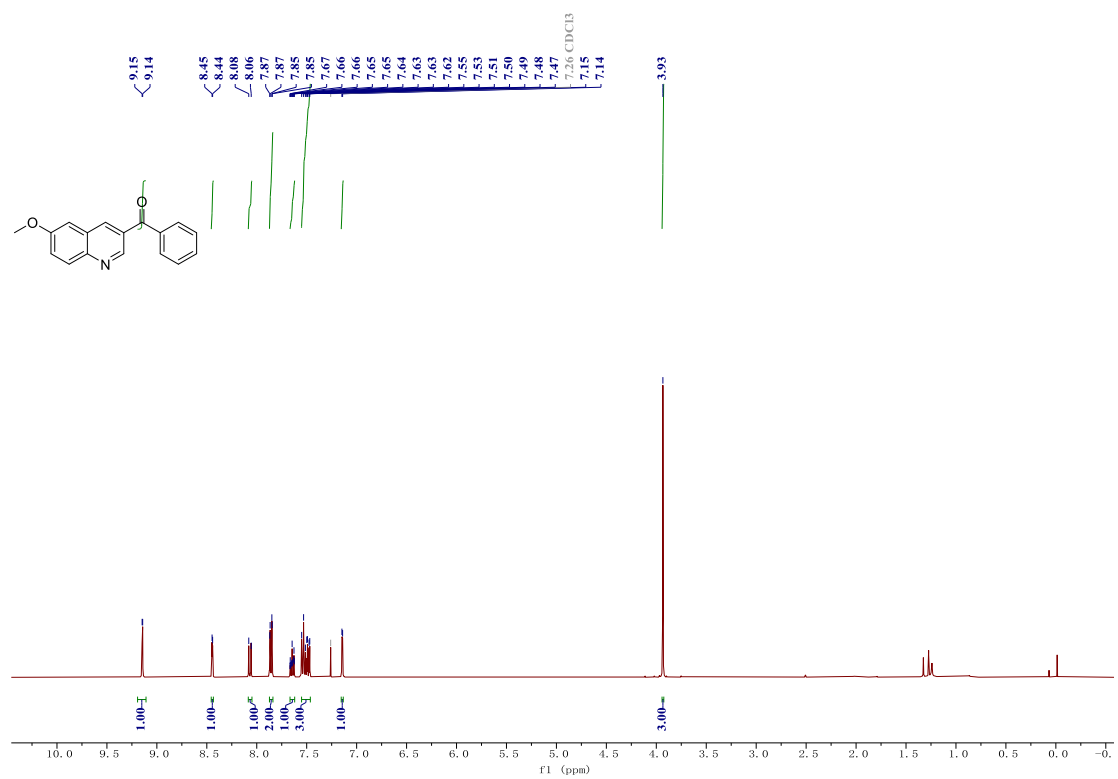

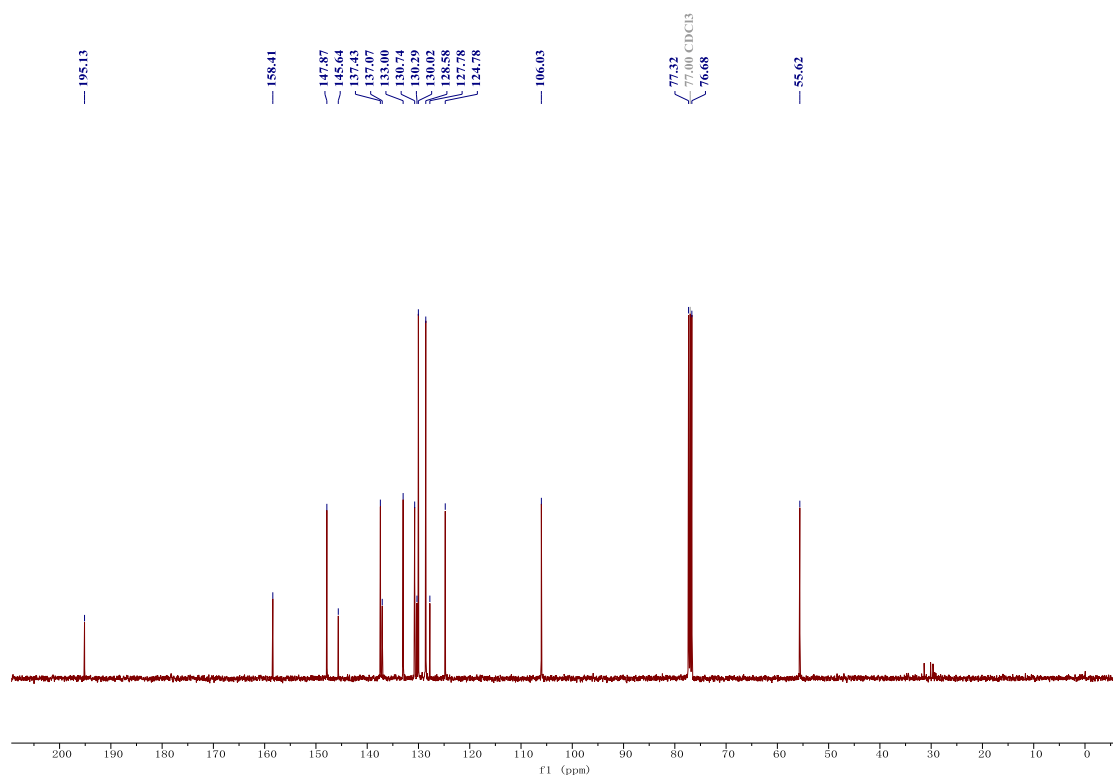

<sup>1</sup>H NMR, <sup>13</sup>C NMR and <sup>19</sup>F NMR for **3ca**

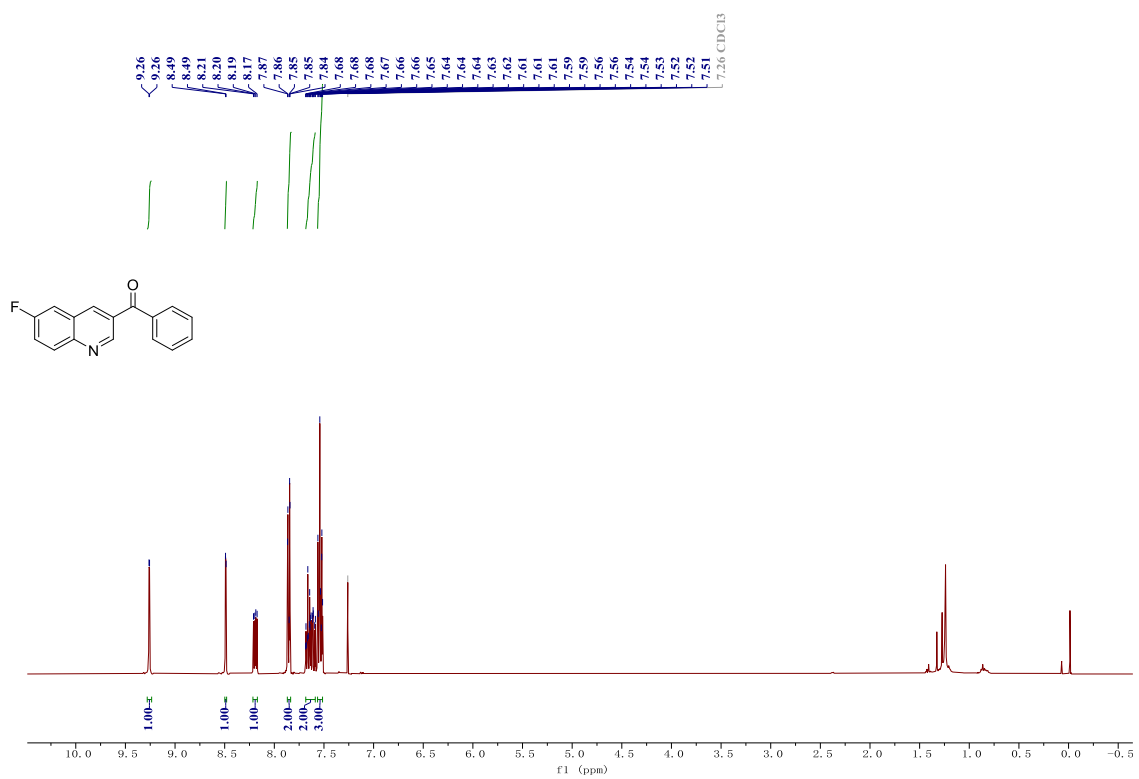

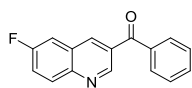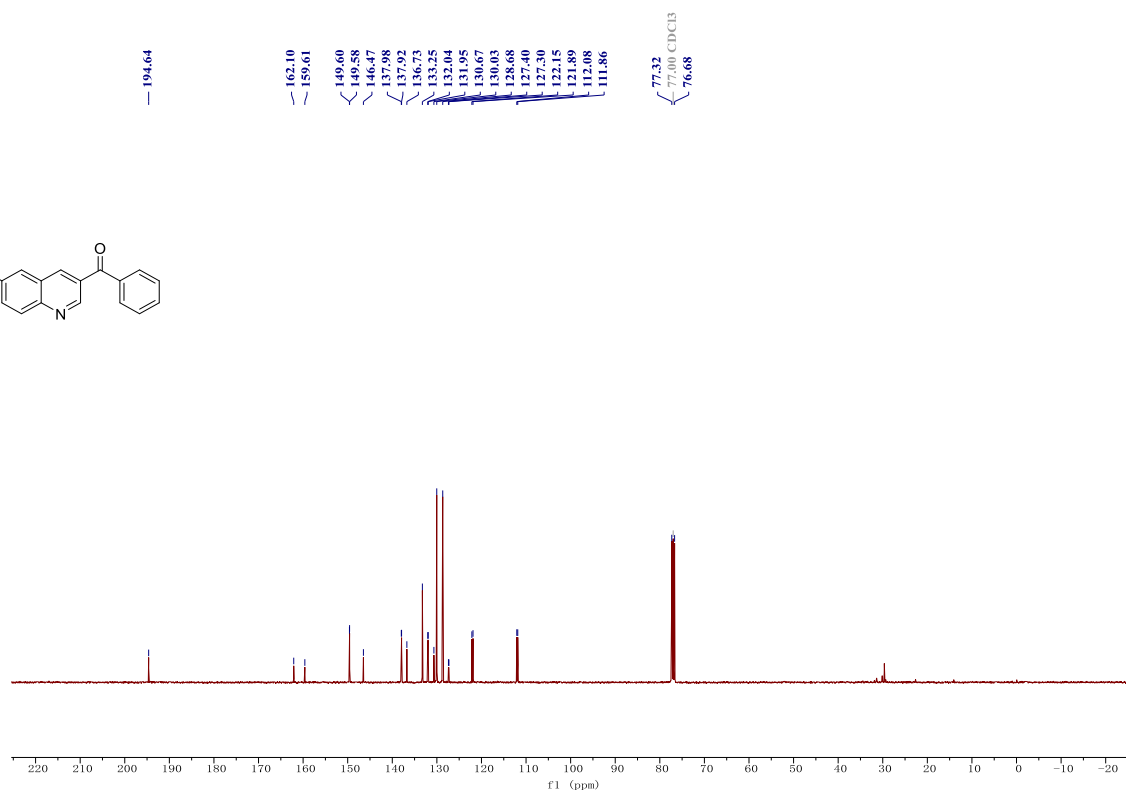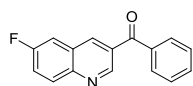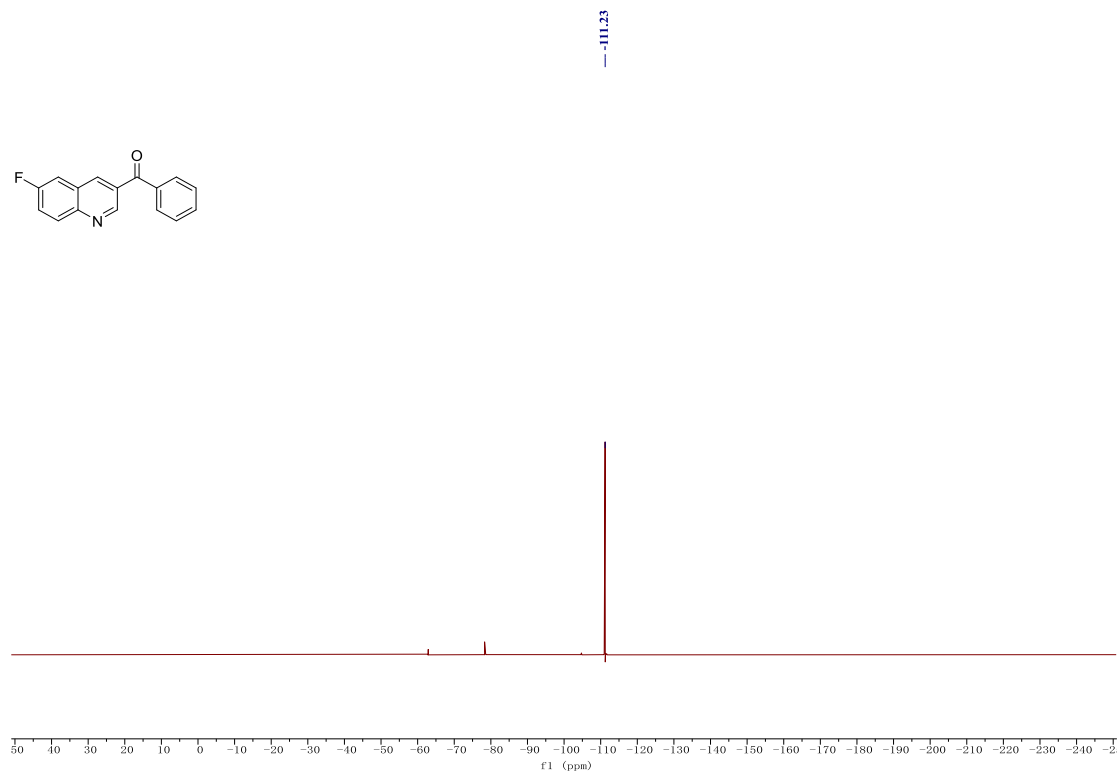

<sup>1</sup>H NMR and <sup>13</sup>C NMR for **3da**

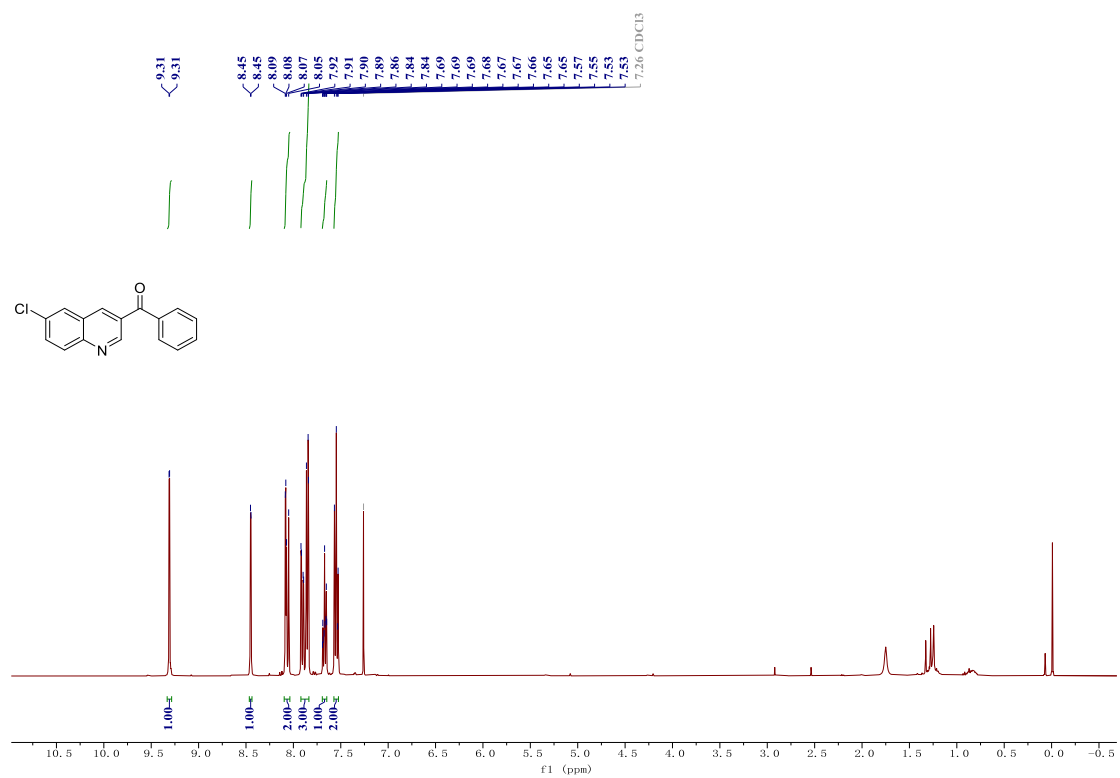

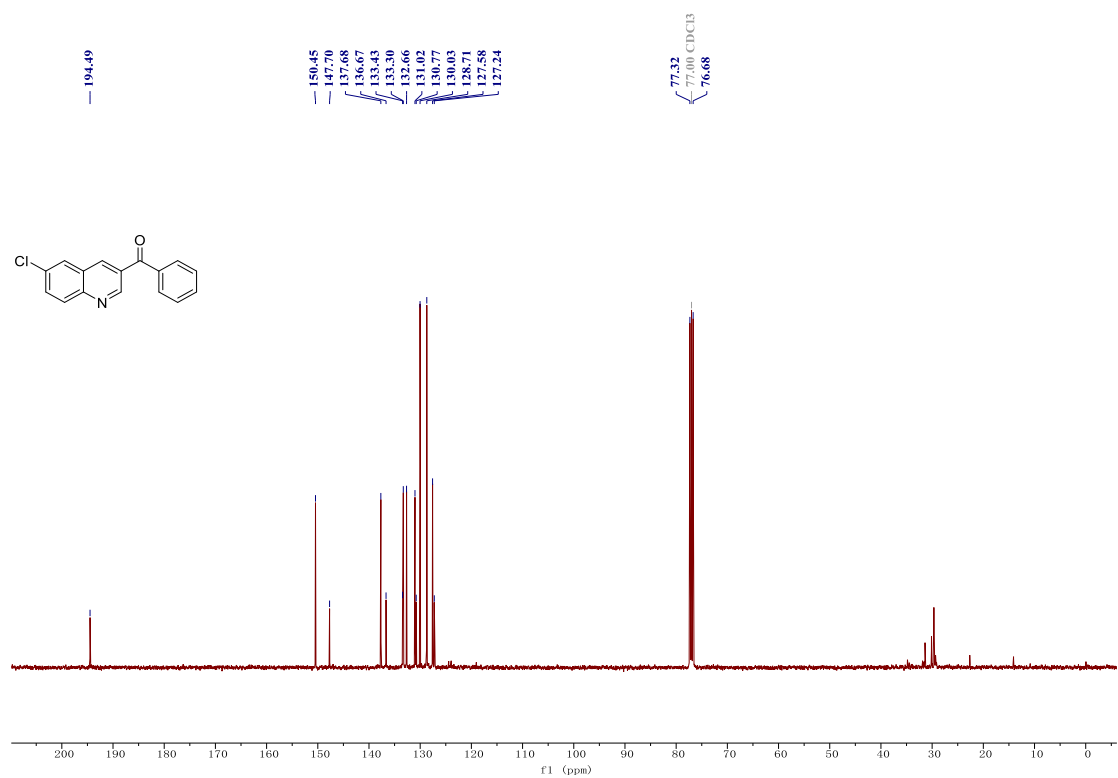

# <sup>1</sup>H NMR and <sup>13</sup>C NMR for 3ea

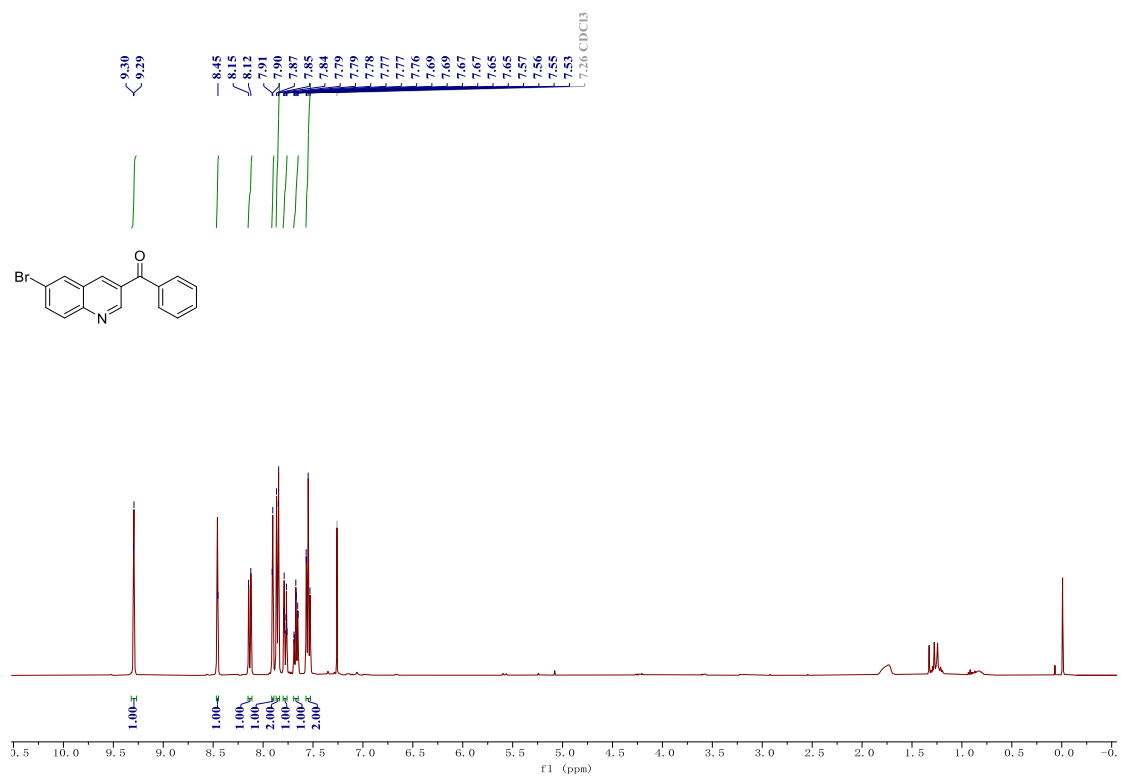

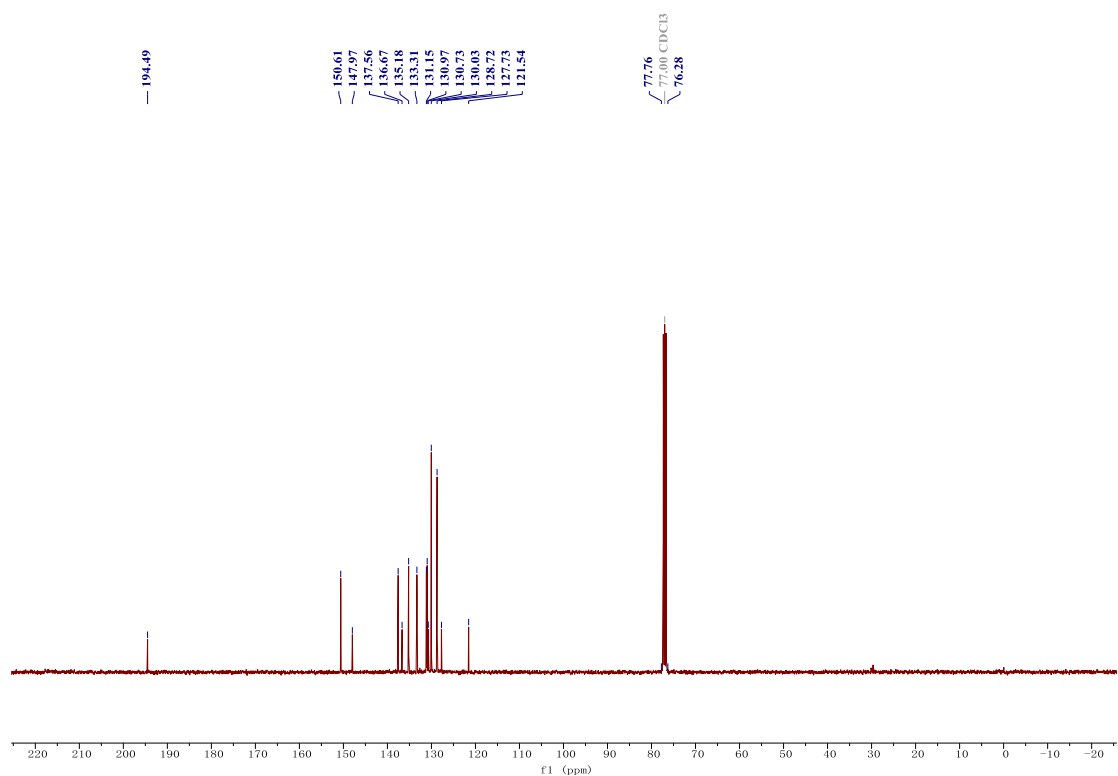

<sup>1</sup>H NMR, <sup>13</sup>C NMR and <sup>19</sup>F NMR for **3fa**

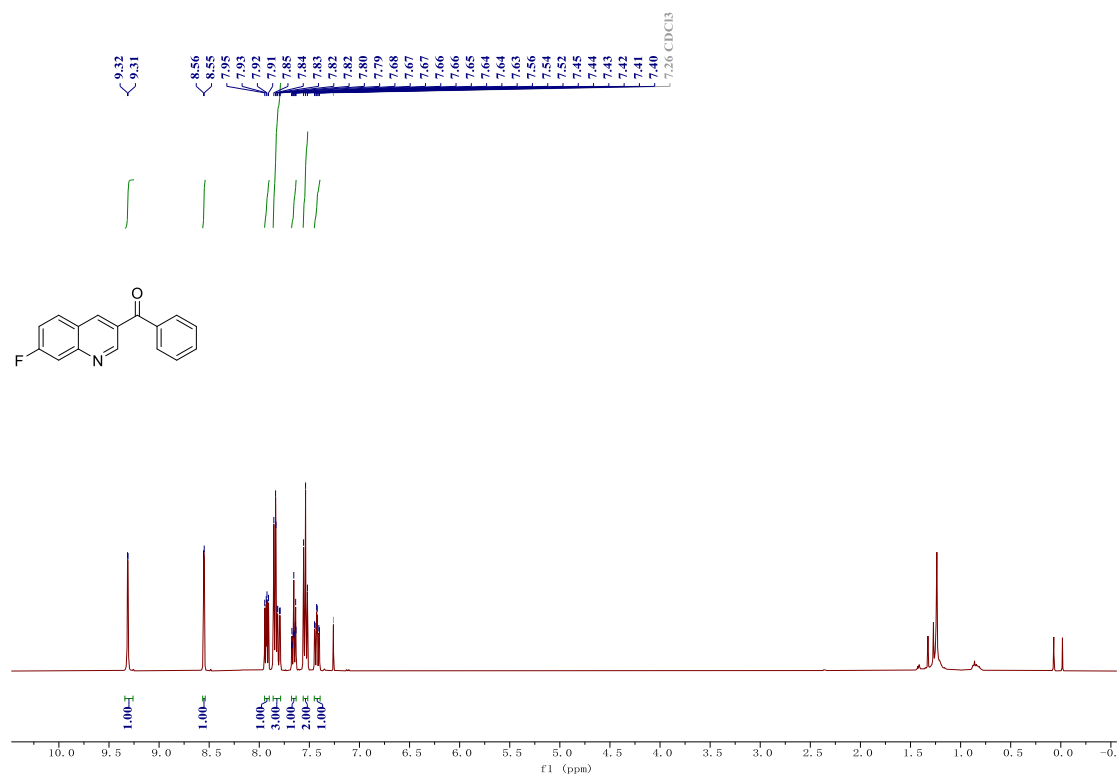

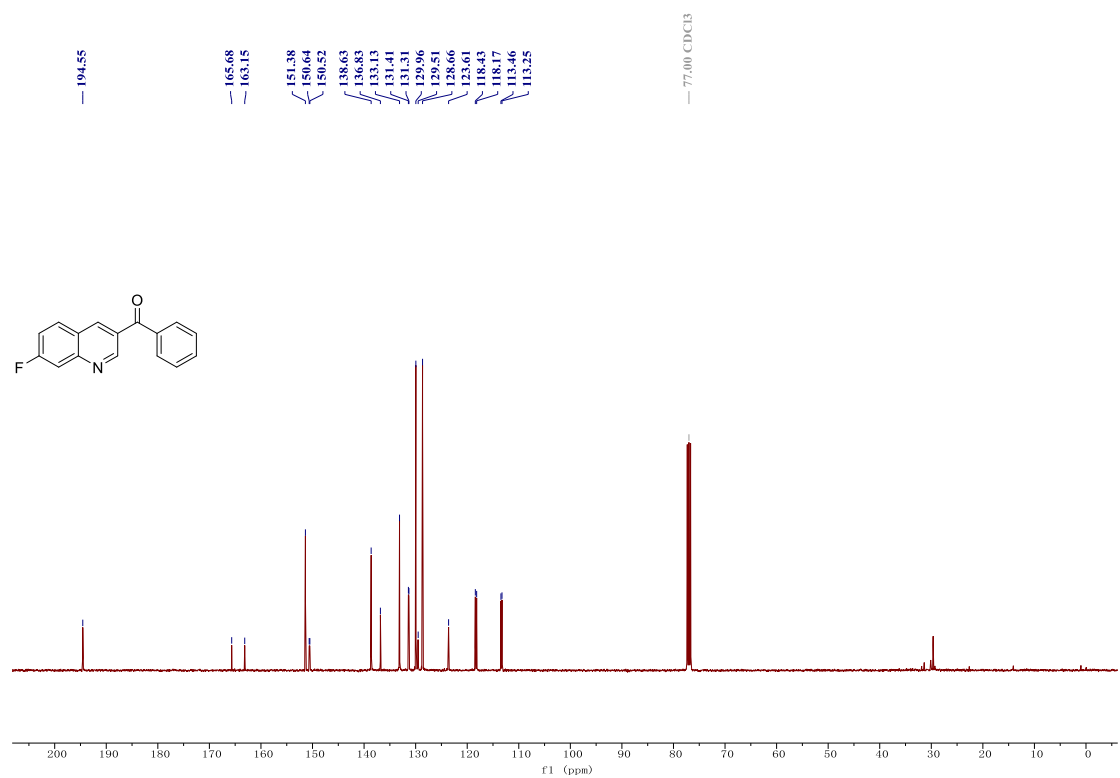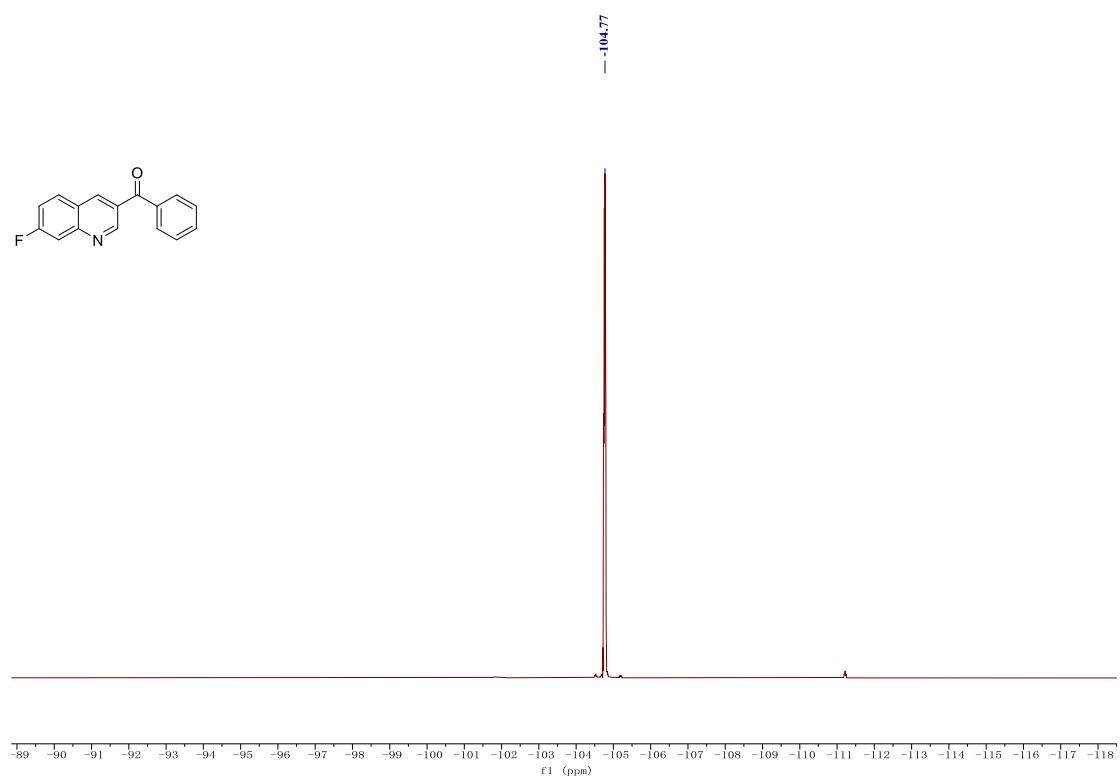

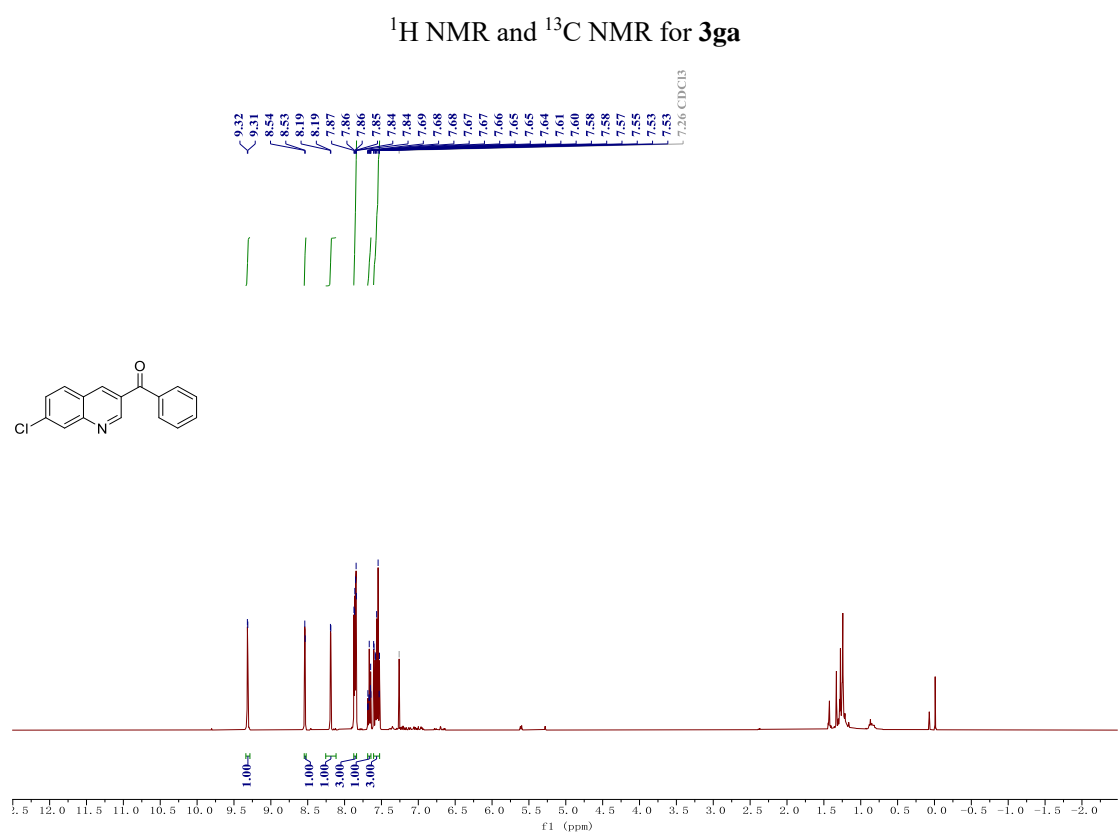

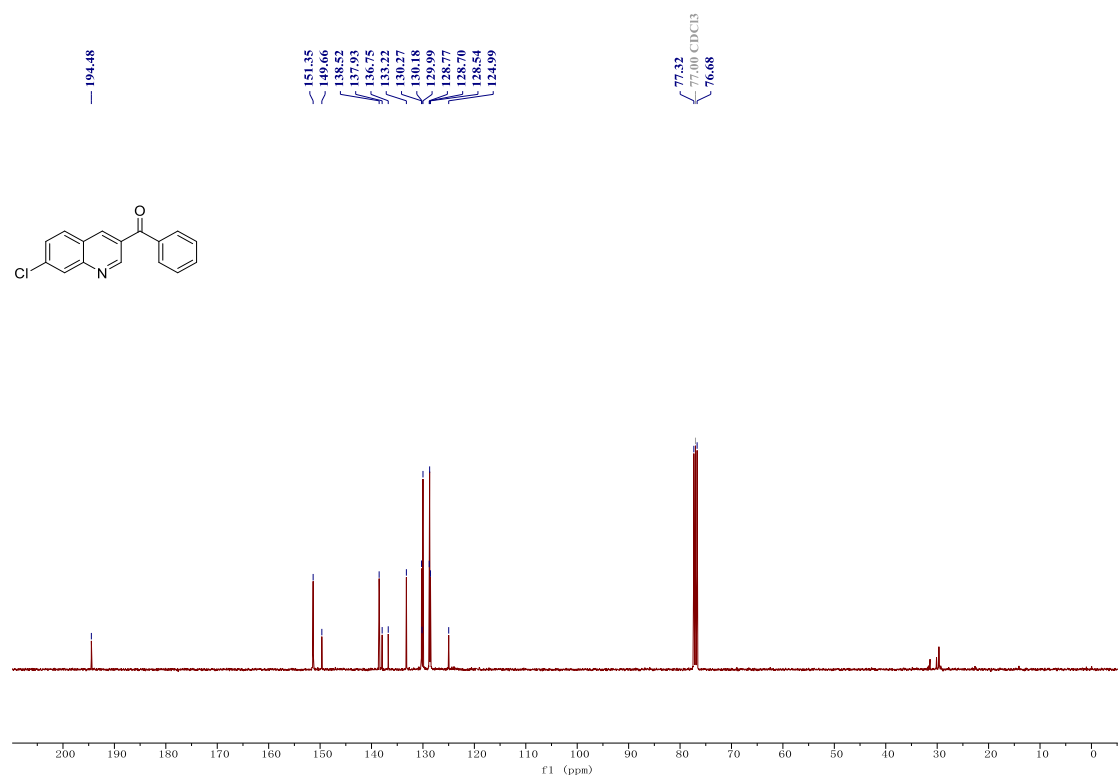

# **<sup>1</sup>H NMR and <sup>13</sup>C NMR for 3ha**

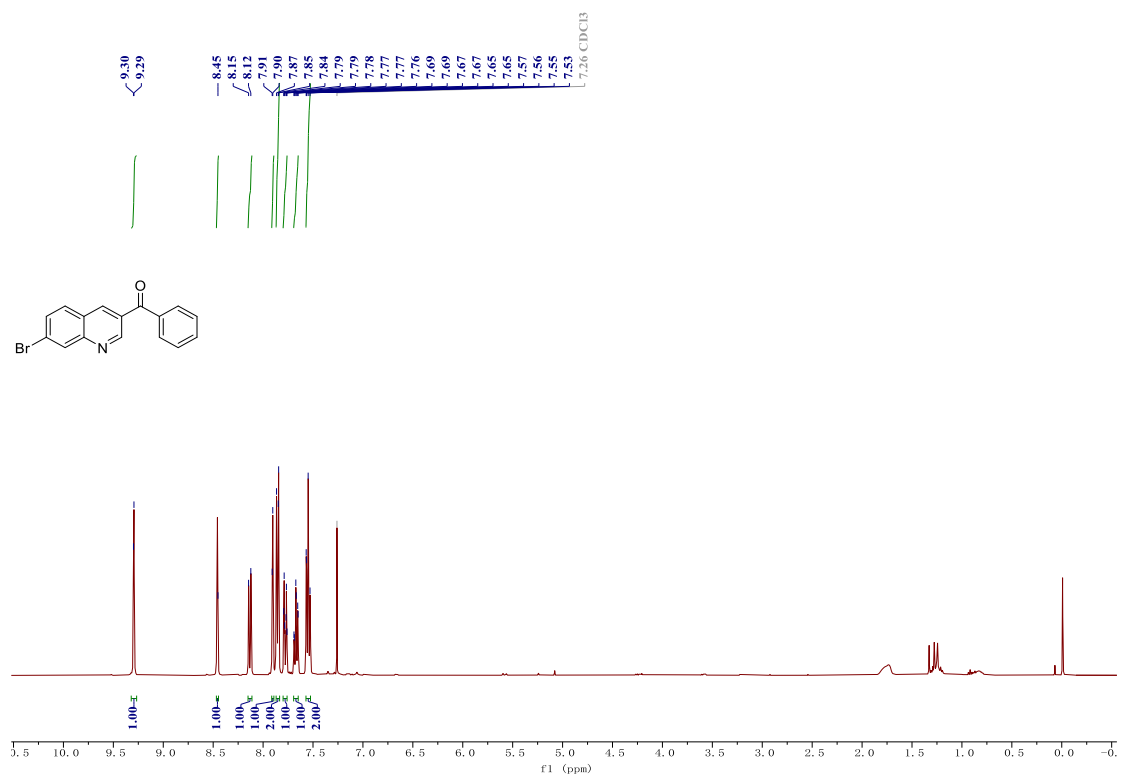

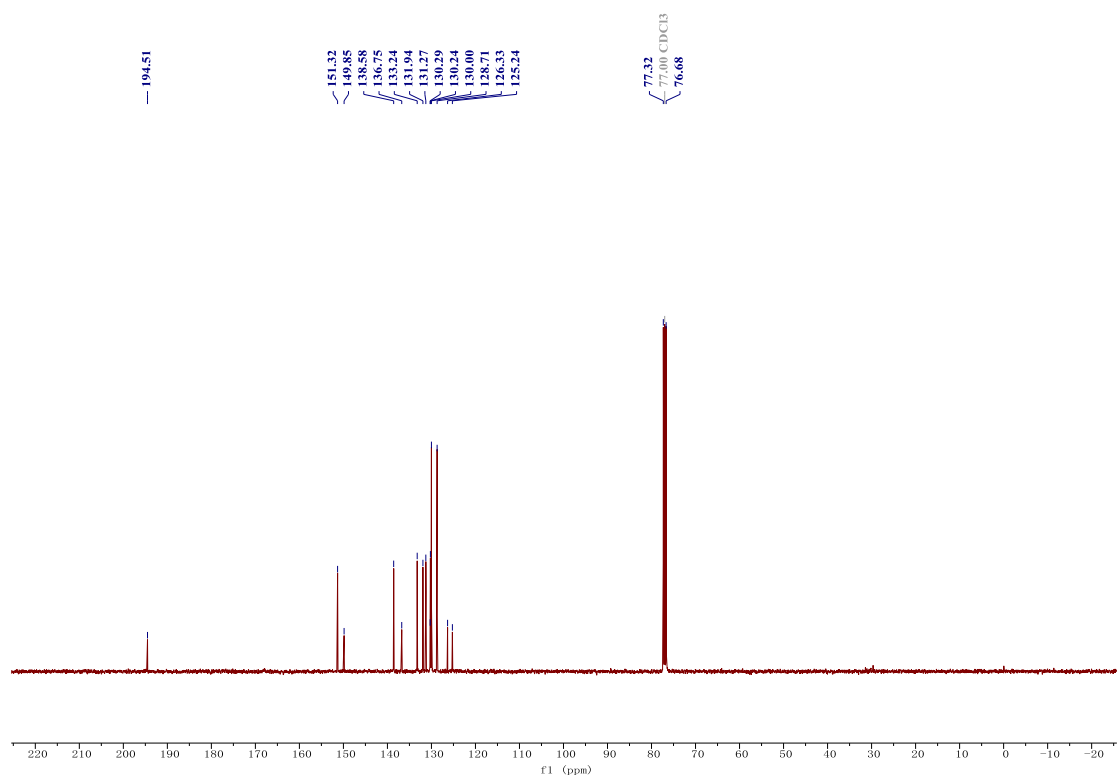

# <sup>1</sup>H NMR and <sup>13</sup>C NMR for **3ia**

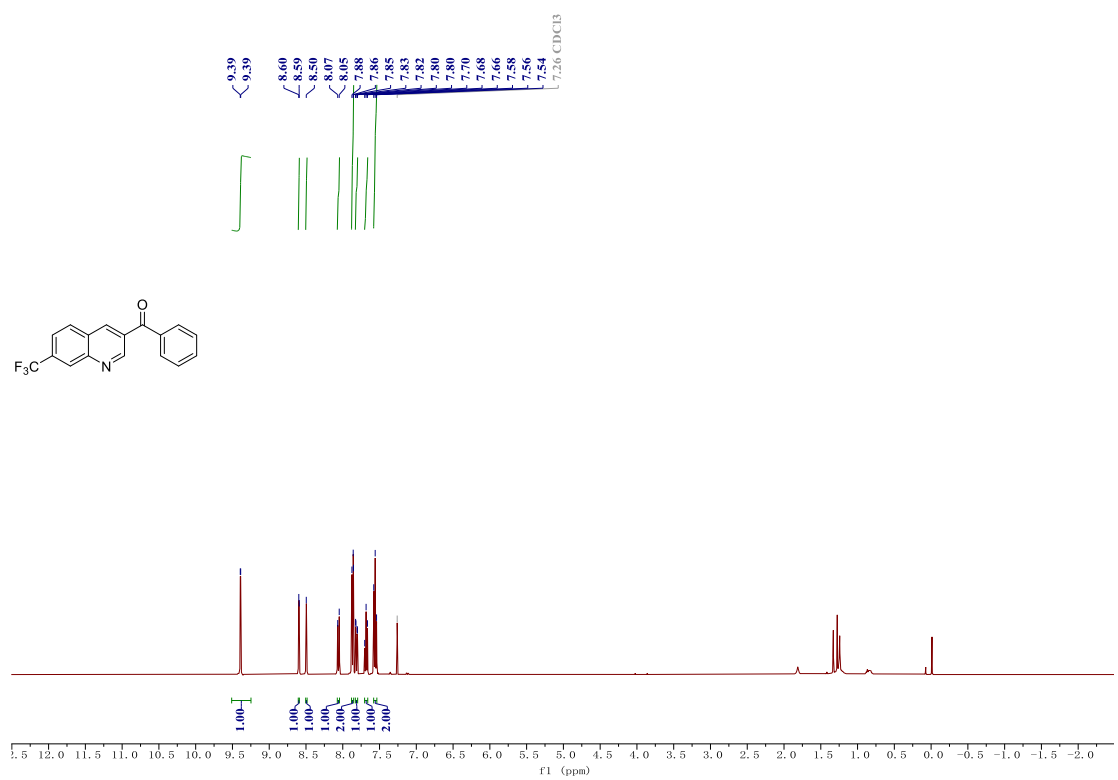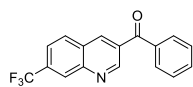

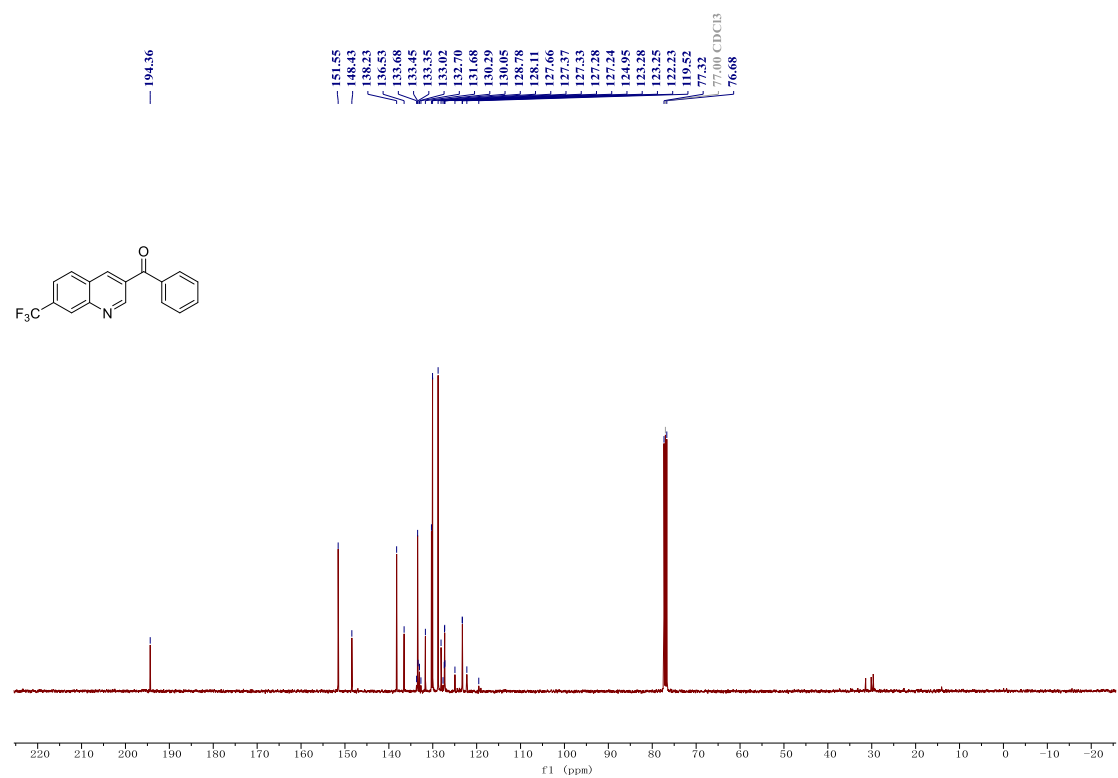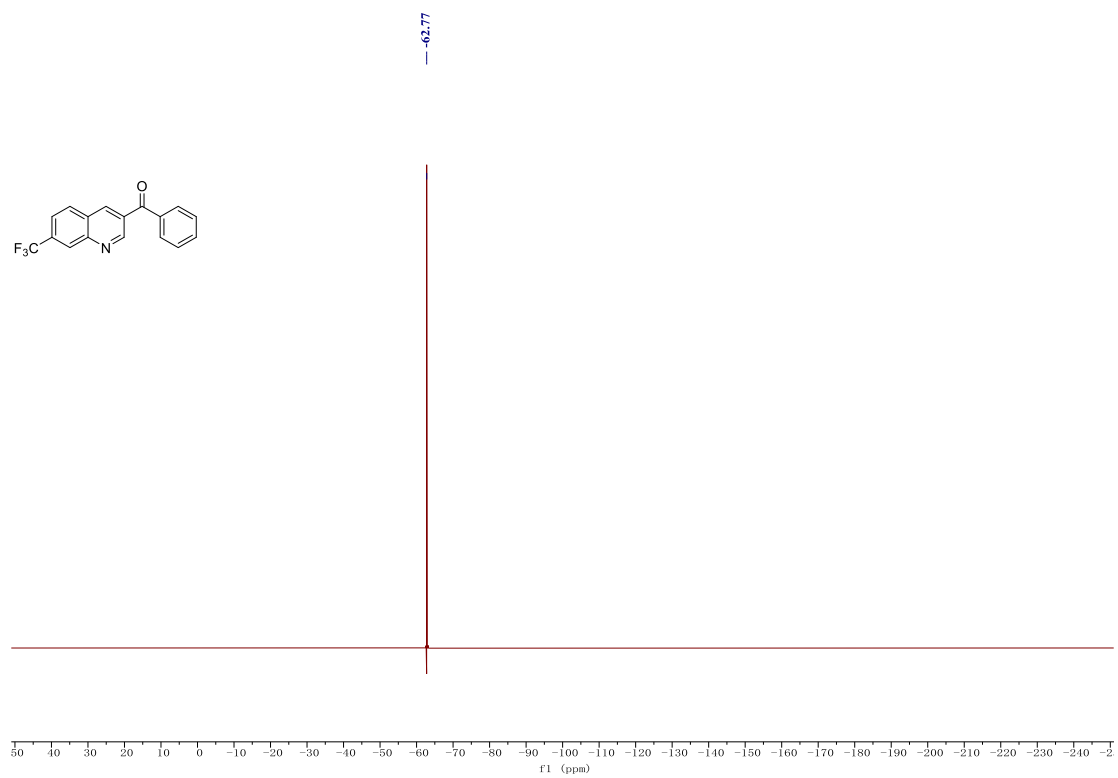

<sup>1</sup>H NMR and <sup>13</sup>C NMR for **3ja**

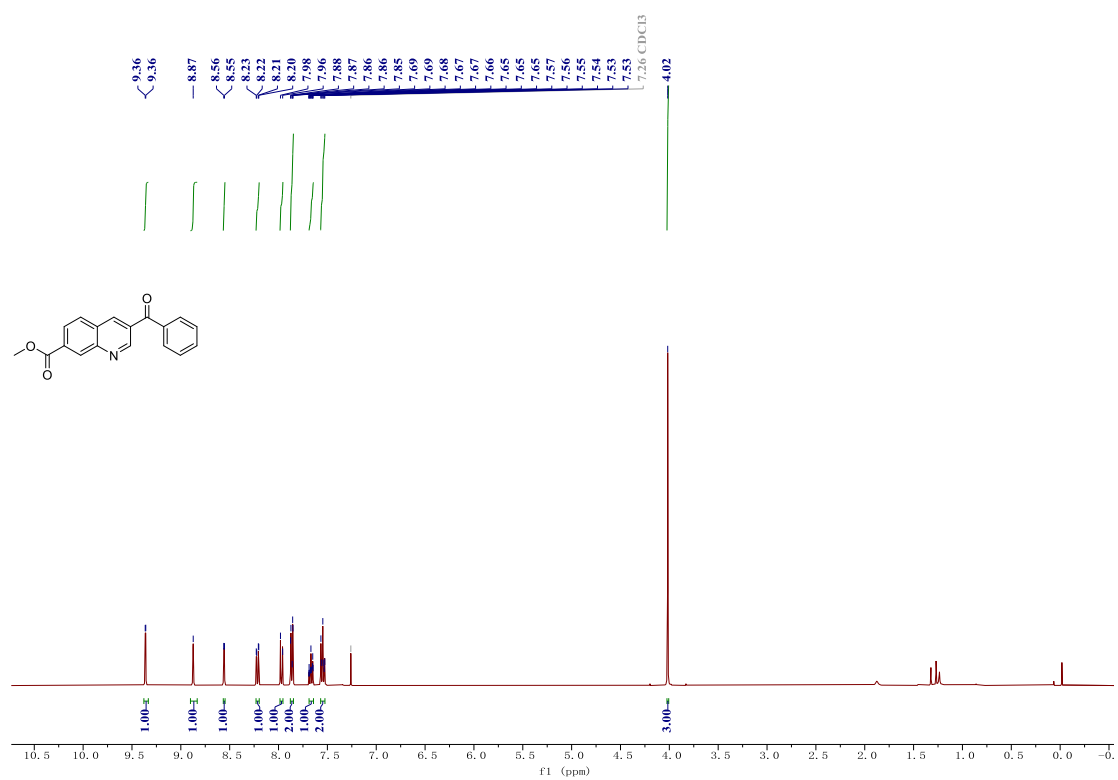

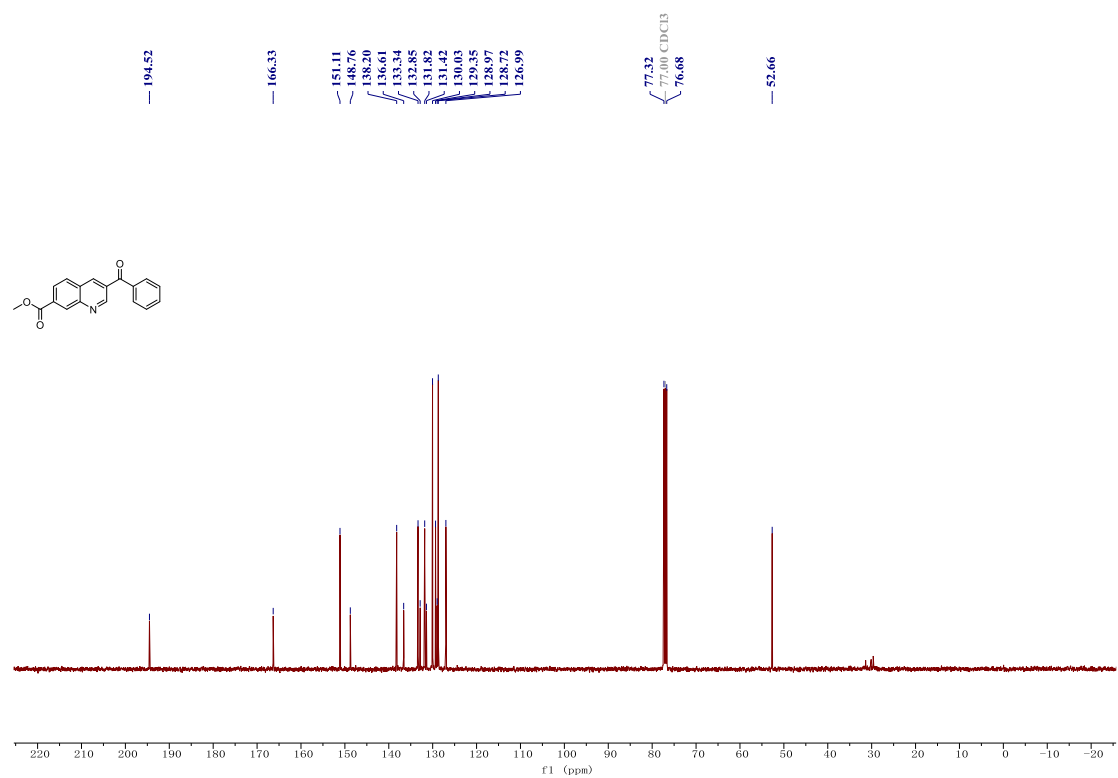

# $^1\text{H}$ NMR and $^{13}\text{C}$ NMR for **3ka**

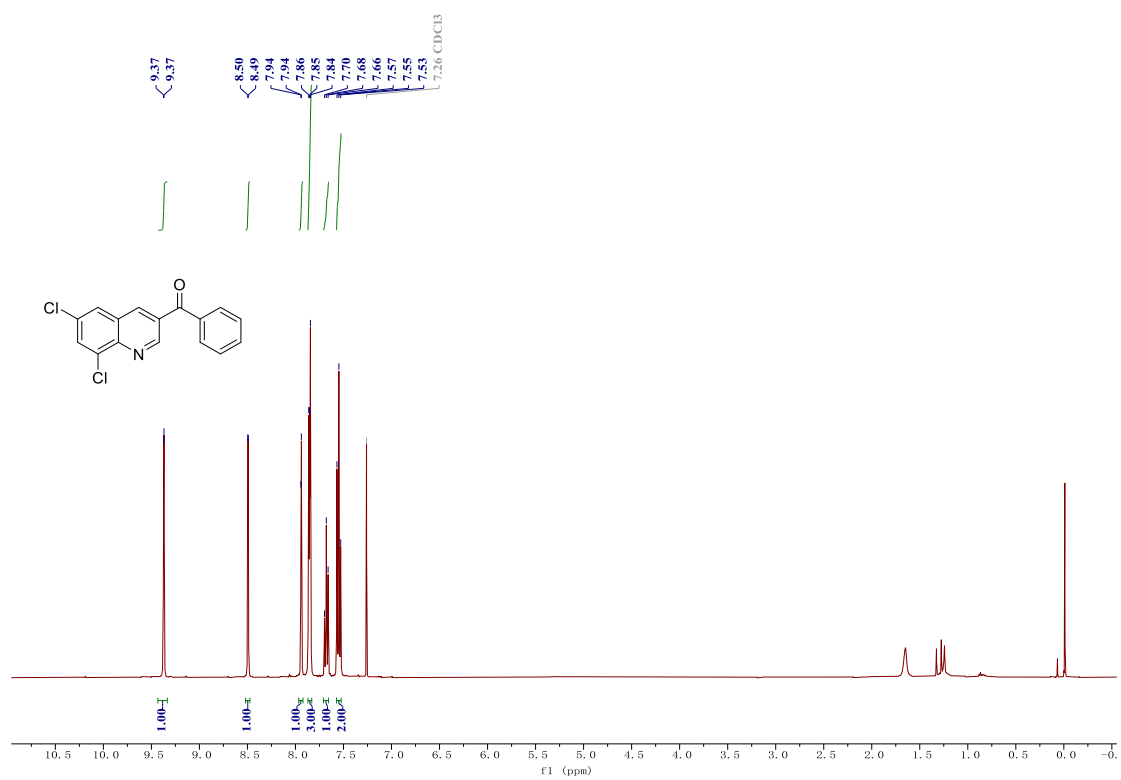

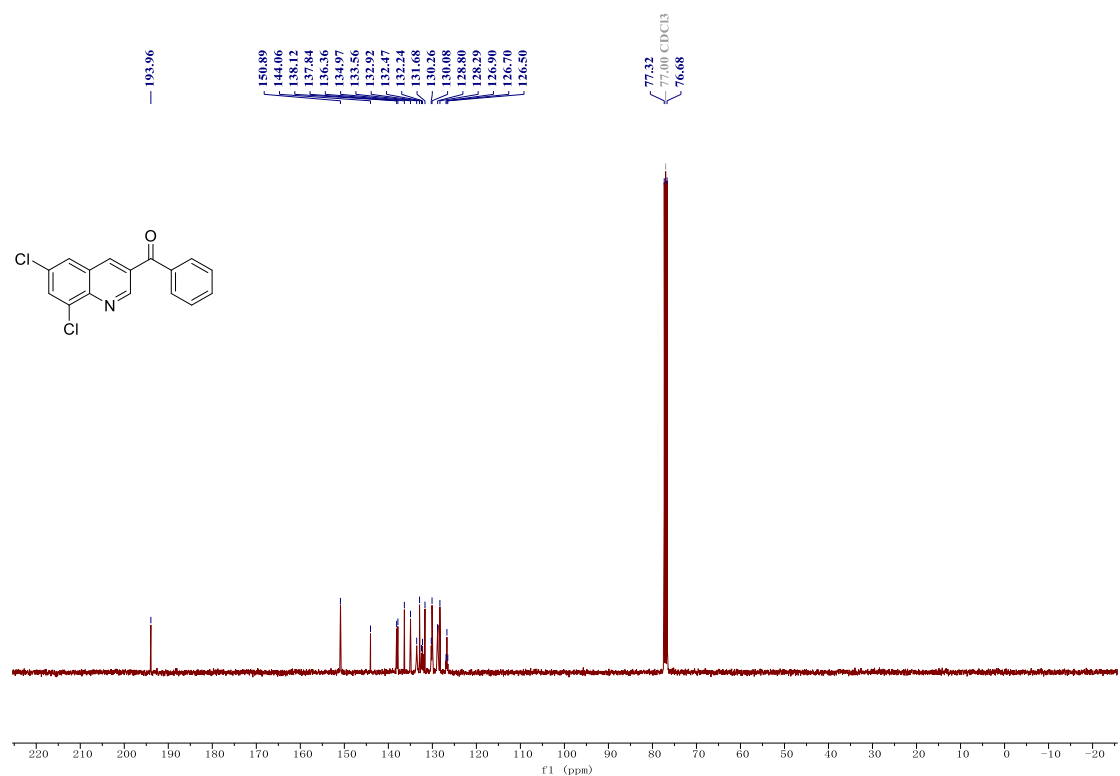

# <sup>1</sup>H NMR and <sup>13</sup>C NMR for 3la

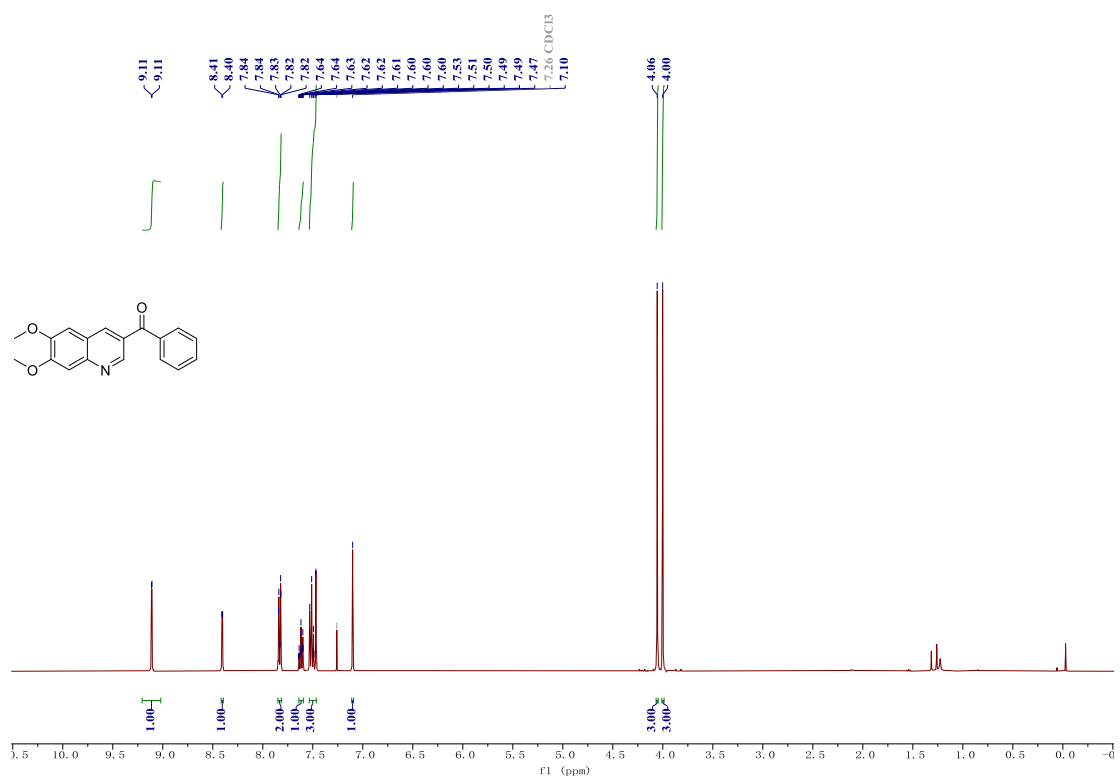

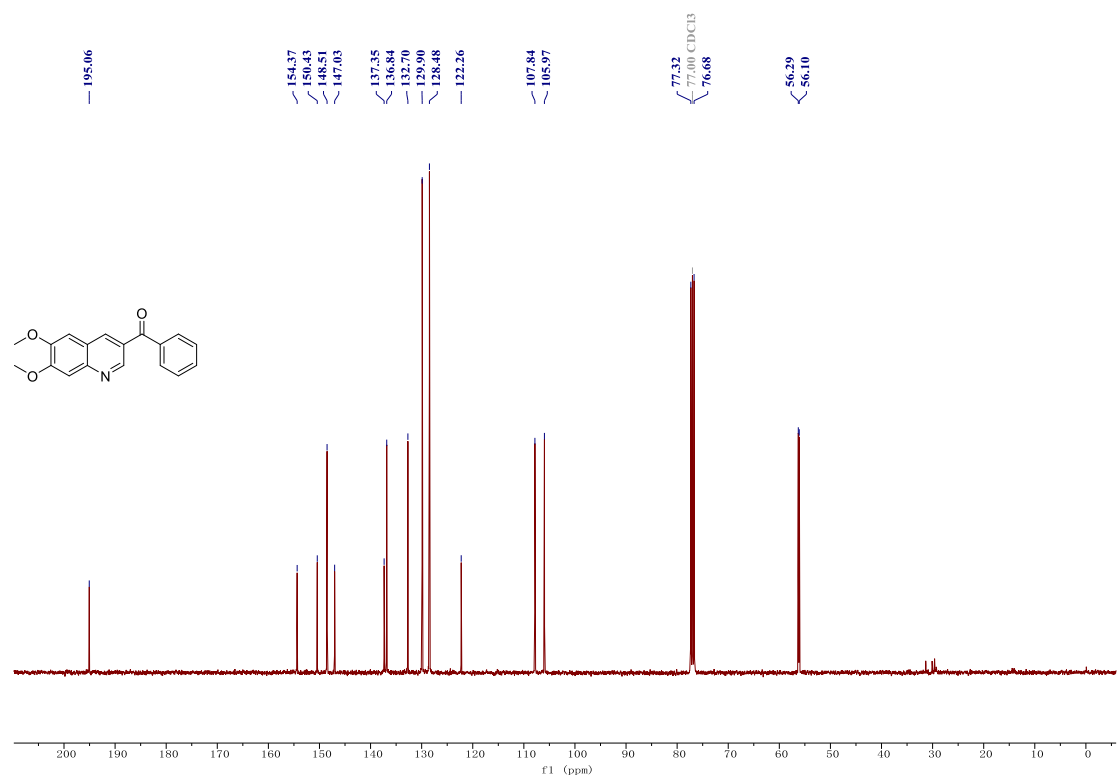

<sup>1</sup>H NMR and <sup>13</sup>C NMR for **3ma**

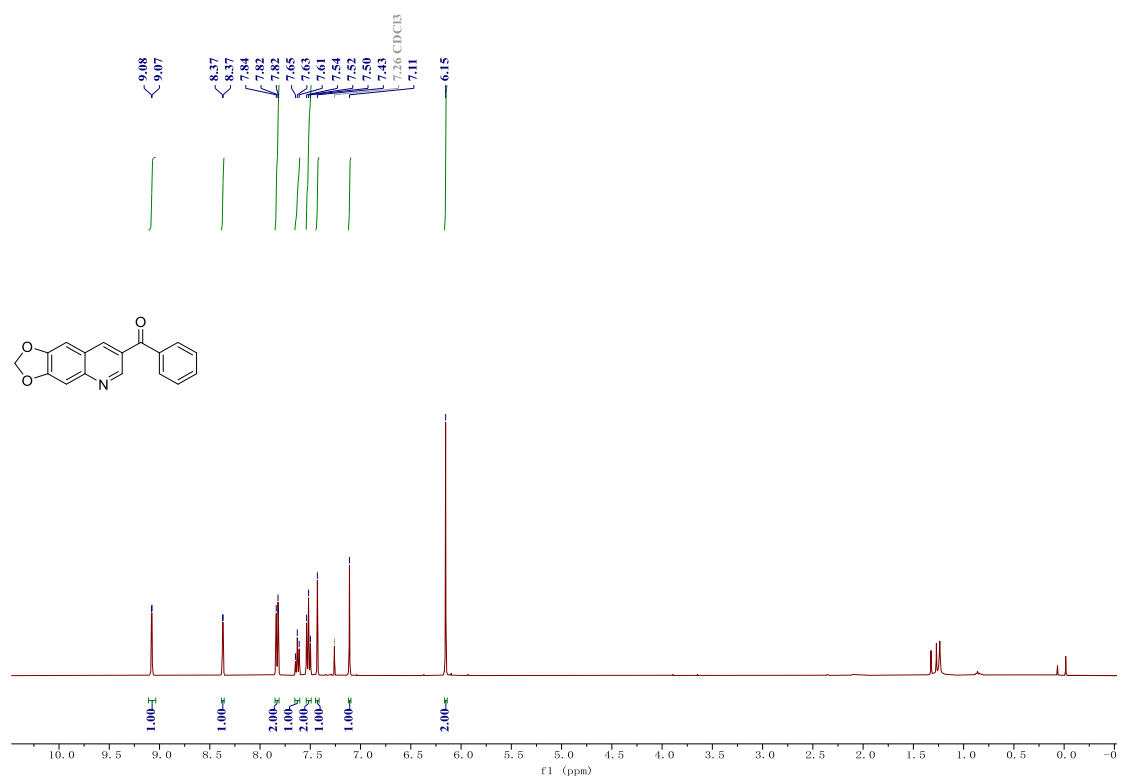

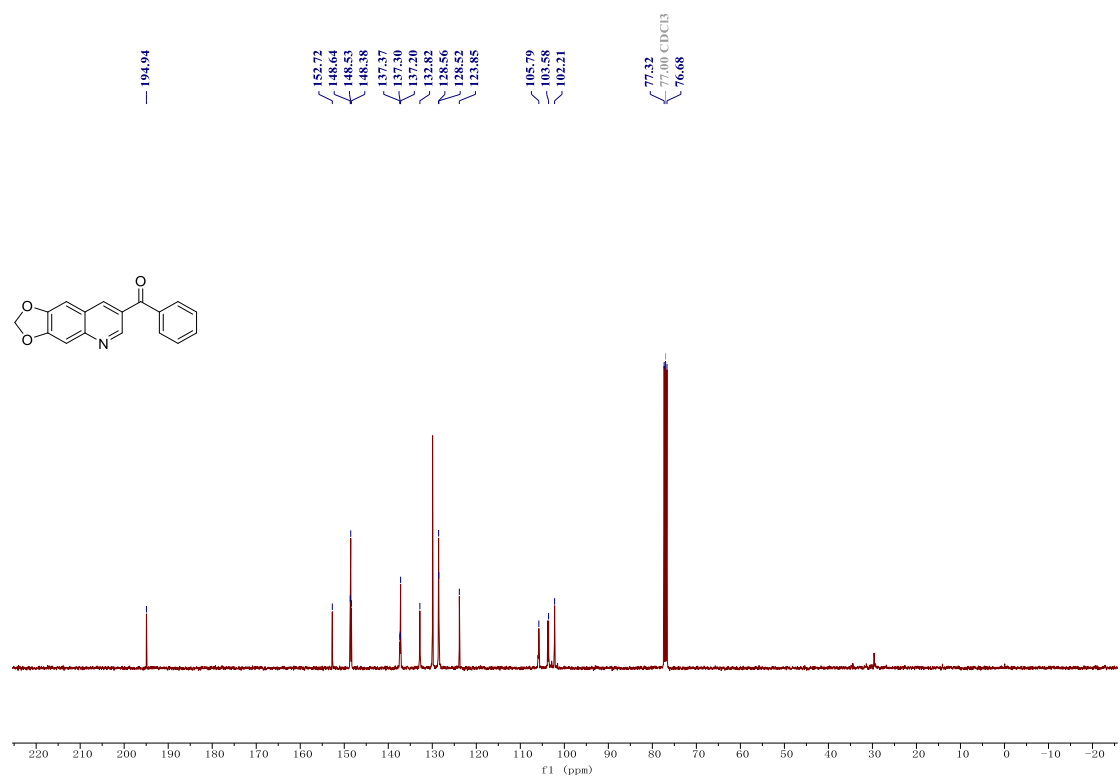

# **<sup>1</sup>H NMR and <sup>13</sup>C NMR for 3na**

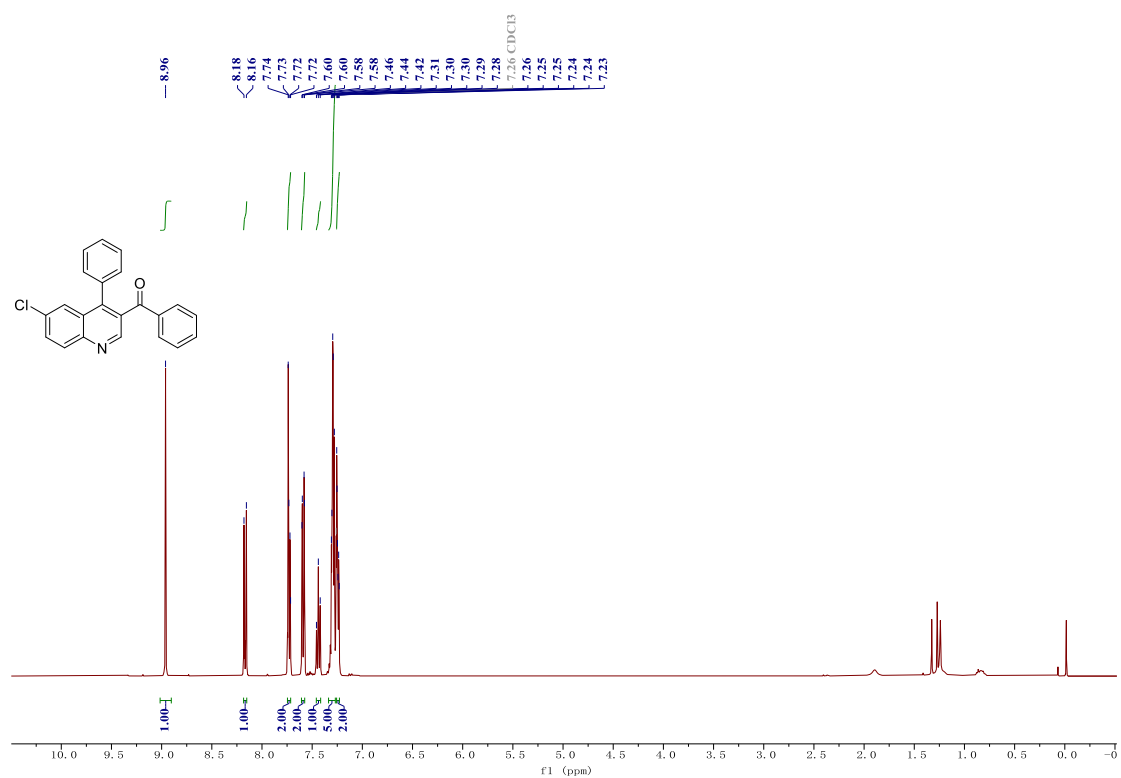

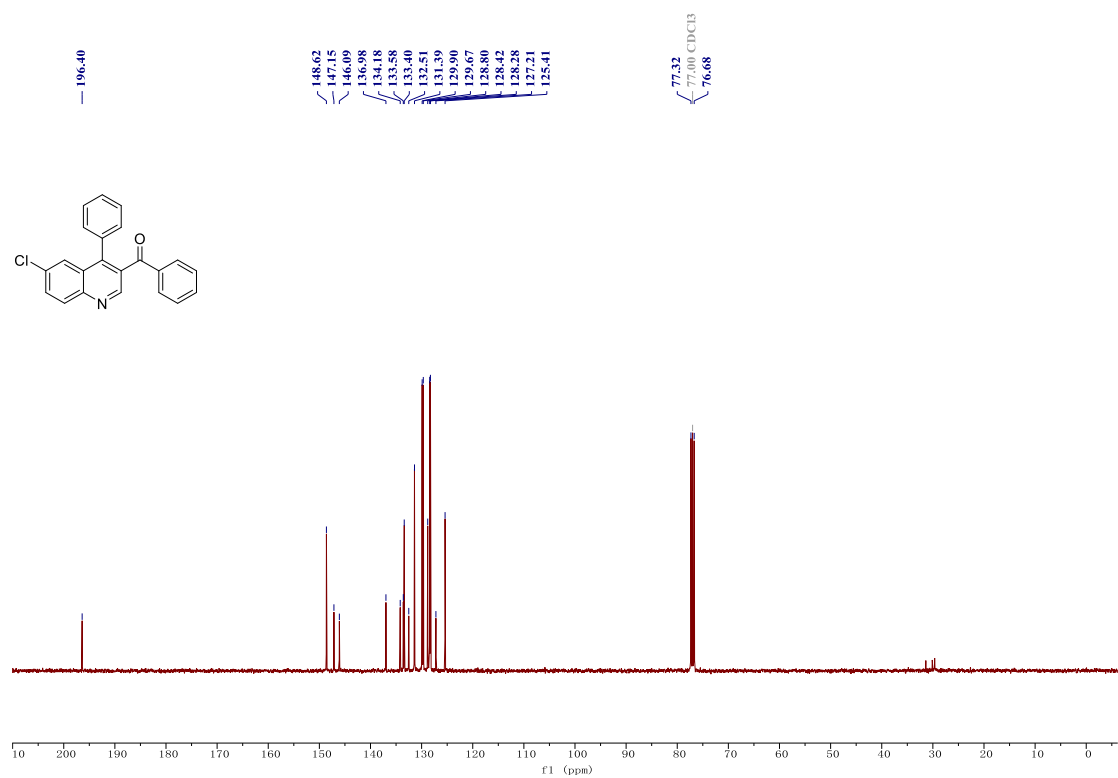

Supplement: s1 [file s1 › catalysts-2343773-supplementary.pdf]
