# Supplementary material for: Transition Metal-Free Synthesis of 3-Acylquinolines through Formal [4+2] Annulation of Anthranils and Enaminones
Source: MDPI journal article supplement (doi:10.3390/catal13040778), 2023-04-20
Supplement: s1 [file s1]

Archive with 1 entries (1 files):
- catalysts-2343773-supplementary.pdf
